# Supplementary material for: Interactive Learning: Blended Learning as a Pedagogical Approach to Enhance Educational Sustainability Based on Students’ Attitude Using SEM Approach
Source: Research Square preprint supplement (doi:10.21203/rs.3.rs-6387680/v1), 2025-09-25
Supplement: Supplementary file 1 [file 94211ba20be7c20bec35c5e5.xlsx]

## Sheet: Navigation
	SmartPLS report
	Please cite the use of SmartPLS: Ringle, C. M., Wende, S., and Becker, J.-M. 2024. "SmartPLS 4." Bönningstedt: SmartPLS, https://www.smartpls.com.
		complete
	Final results
	Path coefficients
	Indirect effects
	Total effects
	Outer loadings
	Outer weights
	Latent variables
	Residuals
	Conditional direct effects
	Conditional indirect effects
	Quality criteria
	R-square
	f-square
	Construct reliability and validity
	Discriminant validity
	Collinearity statistics (VIF)
	Model fit
	Model selection criteria
	Algorithm
	Setting
	Stop criterion changes
	Posthoc minimum sample size
	Execution log
	Model and data
	Inner model
	Outer model
	Indicator data (original)
	Indicator data (standardized)
	Indicator data (correlations)

## Sheet: complete
	SmartPLS report
	Please cite the use of SmartPLS: Ringle, C. M., Wende, S., and Becker, J.-M. 2024. "SmartPLS 4." Bönningstedt: SmartPLS, https://www.smartpls.com.
	Final results
	Path coefficients
	Matrix
		Attitude Toward Blended Learning (ABL)	Computer Self-Efficency (CSE)	Education Sustainability (ES)	Perceived Ease of Use (PEOU)	Perceived Enjoyment (PEN)	Perecived Usefulness (PU)	Student Satisfaction (SS)	Subjective Norm (SN)
	Attitude Toward Blended Learning (ABL)			0.728926
	Computer Self-Efficency (CSE)				-0.0227579		-0.189419	-0.0714988
	Education Sustainability (ES)
	Perceived Ease of Use (PEOU)	0.265912
	Perceived Enjoyment (PEN)				0.346156		0.25048	0.251155
	Perecived Usefulness (PU)	-0.1284
	Student Satisfaction (SS)	0.0557549
	Subjective Norm (SN)				-0.0277107		-0.0772377	-0.282156
	List
		Path coefficients
	Attitude Toward Blended Learning (ABL) -> Education Sustainability (ES)	0.728926
	Computer Self-Efficency (CSE) -> Perceived Ease of Use (PEOU)	-0.0227579
	Computer Self-Efficency (CSE) -> Perecived Usefulness (PU)	-0.189419
	Computer Self-Efficency (CSE) -> Student Satisfaction (SS)	-0.0714988
	Perceived Ease of Use (PEOU) -> Attitude Toward Blended Learning (ABL)	0.265912
	Perceived Enjoyment (PEN) -> Perceived Ease of Use (PEOU)	0.346156
	Perceived Enjoyment (PEN) -> Perecived Usefulness (PU)	0.25048
	Perceived Enjoyment (PEN) -> Student Satisfaction (SS)	0.251155
	Perecived Usefulness (PU) -> Attitude Toward Blended Learning (ABL)	-0.1284
	Student Satisfaction (SS) -> Attitude Toward Blended Learning (ABL)	0.0557549
	Subjective Norm (SN) -> Perceived Ease of Use (PEOU)	-0.0277107
	Subjective Norm (SN) -> Perecived Usefulness (PU)	-0.0772377
	Subjective Norm (SN) -> Student Satisfaction (SS)	-0.282156
	Indirect effects
	Total indirect effects
		Attitude Toward Blended Learning (ABL)	Computer Self-Efficency (CSE)	Education Sustainability (ES)	Perceived Ease of Use (PEOU)	Perceived Enjoyment (PEN)	Perecived Usefulness (PU)	Student Satisfaction (SS)	Subjective Norm (SN)
	Attitude Toward Blended Learning (ABL)
	Computer Self-Efficency (CSE)	0.0142834		0.0104115
	Education Sustainability (ES)
	Perceived Ease of Use (PEOU)			0.19383
	Perceived Enjoyment (PEN)	0.0738886		0.0538593
	Perecived Usefulness (PU)			-0.0935943
	Student Satisfaction (SS)			0.0406412
	Subjective Norm (SN)	-0.0131828		-0.00960931
	Specific indirect effects
		Specific indirect effects
	Perceived Enjoyment (PEN) -> Perceived Ease of Use (PEOU) -> Attitude Toward Blended Learning (ABL)	0.0920471
	Subjective Norm (SN) -> Student Satisfaction (SS) -> Attitude Toward Blended Learning (ABL)	-0.0157316
	Subjective Norm (SN) -> Perecived Usefulness (PU) -> Attitude Toward Blended Learning (ABL)	0.00991735
	Subjective Norm (SN) -> Perceived Ease of Use (PEOU) -> Attitude Toward Blended Learning (ABL)	-0.00736863
	Perceived Ease of Use (PEOU) -> Attitude Toward Blended Learning (ABL) -> Education Sustainability (ES)	0.19383
	Computer Self-Efficency (CSE) -> Student Satisfaction (SS) -> Attitude Toward Blended Learning (ABL) -> Education Sustainability (ES)	-0.0029058
	Perecived Usefulness (PU) -> Attitude Toward Blended Learning (ABL) -> Education Sustainability (ES)	-0.0935943
	Student Satisfaction (SS) -> Attitude Toward Blended Learning (ABL) -> Education Sustainability (ES)	0.0406412
	Computer Self-Efficency (CSE) -> Perecived Usefulness (PU) -> Attitude Toward Blended Learning (ABL) -> Education Sustainability (ES)	0.0177285
	Perceived Enjoyment (PEN) -> Student Satisfaction (SS) -> Attitude Toward Blended Learning (ABL) -> Education Sustainability (ES)	0.0102072
	Computer Self-Efficency (CSE) -> Perceived Ease of Use (PEOU) -> Attitude Toward Blended Learning (ABL) -> Education Sustainability (ES)	-0.00441118
	Perceived Enjoyment (PEN) -> Perecived Usefulness (PU) -> Attitude Toward Blended Learning (ABL) -> Education Sustainability (ES)	-0.0234435
	Perceived Enjoyment (PEN) -> Perceived Ease of Use (PEOU) -> Attitude Toward Blended Learning (ABL) -> Education Sustainability (ES)	0.0670955
	Subjective Norm (SN) -> Perceived Ease of Use (PEOU) -> Attitude Toward Blended Learning (ABL) -> Education Sustainability (ES)	-0.00537119
	Subjective Norm (SN) -> Perecived Usefulness (PU) -> Attitude Toward Blended Learning (ABL) -> Education Sustainability (ES)	0.00722901
	Subjective Norm (SN) -> Student Satisfaction (SS) -> Attitude Toward Blended Learning (ABL) -> Education Sustainability (ES)	-0.0114671
	Computer Self-Efficency (CSE) -> Student Satisfaction (SS) -> Attitude Toward Blended Learning (ABL)	-0.00398641
	Computer Self-Efficency (CSE) -> Perecived Usefulness (PU) -> Attitude Toward Blended Learning (ABL)	0.0243214
	Computer Self-Efficency (CSE) -> Perceived Ease of Use (PEOU) -> Attitude Toward Blended Learning (ABL)	-0.00605161
	Perceived Enjoyment (PEN) -> Student Satisfaction (SS) -> Attitude Toward Blended Learning (ABL)	0.0140031
	Perceived Enjoyment (PEN) -> Perecived Usefulness (PU) -> Attitude Toward Blended Learning (ABL)	-0.0321617
	Total effects
	Matrix
		Attitude Toward Blended Learning (ABL)	Computer Self-Efficency (CSE)	Education Sustainability (ES)	Perceived Ease of Use (PEOU)	Perceived Enjoyment (PEN)	Perecived Usefulness (PU)	Student Satisfaction (SS)	Subjective Norm (SN)
	Attitude Toward Blended Learning (ABL)			0.728926
	Computer Self-Efficency (CSE)	0.0142834		0.0104115	-0.0227579		-0.189419	-0.0714988
	Education Sustainability (ES)
	Perceived Ease of Use (PEOU)	0.265912		0.19383
	Perceived Enjoyment (PEN)	0.0738886		0.0538593	0.346156		0.25048	0.251155
	Perecived Usefulness (PU)	-0.1284		-0.0935943
	Student Satisfaction (SS)	0.0557549		0.0406412
	Subjective Norm (SN)	-0.0131828		-0.00960931	-0.0277107		-0.0772377	-0.282156
	List
		Total effects
	Attitude Toward Blended Learning (ABL) -> Education Sustainability (ES)	0.728926
	Computer Self-Efficency (CSE) -> Attitude Toward Blended Learning (ABL)	0.0142834
	Computer Self-Efficency (CSE) -> Education Sustainability (ES)	0.0104115
	Computer Self-Efficency (CSE) -> Perceived Ease of Use (PEOU)	-0.0227579
	Computer Self-Efficency (CSE) -> Perecived Usefulness (PU)	-0.189419
	Computer Self-Efficency (CSE) -> Student Satisfaction (SS)	-0.0714988
	Perceived Ease of Use (PEOU) -> Attitude Toward Blended Learning (ABL)	0.265912
	Perceived Ease of Use (PEOU) -> Education Sustainability (ES)	0.19383
	Perceived Enjoyment (PEN) -> Attitude Toward Blended Learning (ABL)	0.0738886
	Perceived Enjoyment (PEN) -> Education Sustainability (ES)	0.0538593
	Perceived Enjoyment (PEN) -> Perceived Ease of Use (PEOU)	0.346156
	Perceived Enjoyment (PEN) -> Perecived Usefulness (PU)	0.25048
	Perceived Enjoyment (PEN) -> Student Satisfaction (SS)	0.251155
	Perecived Usefulness (PU) -> Attitude Toward Blended Learning (ABL)	-0.1284
	Perecived Usefulness (PU) -> Education Sustainability (ES)	-0.0935943
	Student Satisfaction (SS) -> Attitude Toward Blended Learning (ABL)	0.0557549
	Student Satisfaction (SS) -> Education Sustainability (ES)	0.0406412
	Subjective Norm (SN) -> Attitude Toward Blended Learning (ABL)	-0.0131828
	Subjective Norm (SN) -> Education Sustainability (ES)	-0.00960931
	Subjective Norm (SN) -> Perceived Ease of Use (PEOU)	-0.0277107
	Subjective Norm (SN) -> Perecived Usefulness (PU)	-0.0772377
	Subjective Norm (SN) -> Student Satisfaction (SS)	-0.282156
	Outer loadings
	Matrix
		Attitude Toward Blended Learning (ABL)	Computer Self-Efficency (CSE)	Education Sustainability (ES)	Perceived Ease of Use (PEOU)	Perceived Enjoyment (PEN)	Perecived Usefulness (PU)	Student Satisfaction (SS)	Subjective Norm (SN)
	ABL1	0.786043
	ABL2	0.89507
	ABL3	0.906038
	CSE1		0.40554
	CSE2		0.740491
	CSE3		0.990615
	ES1			0.882077
	ES2			0.909571
	PEOU1				0.883458
	PEOU2				0.82642
	PEOU3				0.645297
	PN1					0.764397
	PN2					0.750998
	PN3					0.809295
	PN4					0.755518
	PU1						0.718014
	PU2						0.475637
	PU3						0.751387
	SN1								0.216999
	SN2								0.0513073
	SN3								-0.654149
	SS1							0.664854
	SS2							0.807445
	SS3							0.762833
	List
		Outer loadings
	ABL1 <- Attitude Toward Blended Learning (ABL)	0.786043
	ABL2 <- Attitude Toward Blended Learning (ABL)	0.89507
	ABL3 <- Attitude Toward Blended Learning (ABL)	0.906038
	CSE1 <- Computer Self-Efficency (CSE)	0.40554
	CSE2 <- Computer Self-Efficency (CSE)	0.740491
	CSE3 <- Computer Self-Efficency (CSE)	0.990615
	ES1 <- Education Sustainability (ES)	0.882077
	ES2 <- Education Sustainability (ES)	0.909571
	PEOU1 <- Perceived Ease of Use (PEOU)	0.883458
	PEOU2 <- Perceived Ease of Use (PEOU)	0.82642
	PEOU3 <- Perceived Ease of Use (PEOU)	0.645297
	PN1 <- Perceived Enjoyment (PEN)	0.764397
	PN2 <- Perceived Enjoyment (PEN)	0.750998
	PN3 <- Perceived Enjoyment (PEN)	0.809295
	PN4 <- Perceived Enjoyment (PEN)	0.755518
	PU1 <- Perecived Usefulness (PU)	0.718014
	PU2 <- Perecived Usefulness (PU)	0.475637
	PU3 <- Perecived Usefulness (PU)	0.751387
	SN1 <- Subjective Norm (SN)	0.216999
	SN2 <- Subjective Norm (SN)	0.0513073
	SN3 <- Subjective Norm (SN)	-0.654149
	SS1 <- Student Satisfaction (SS)	0.664854
	SS2 <- Student Satisfaction (SS)	0.807445
	SS3 <- Student Satisfaction (SS)	0.762833
	Outer weights
	Matrix
		Attitude Toward Blended Learning (ABL)	Computer Self-Efficency (CSE)	Education Sustainability (ES)	Perceived Ease of Use (PEOU)	Perceived Enjoyment (PEN)	Perecived Usefulness (PU)	Student Satisfaction (SS)	Subjective Norm (SN)
	ABL1	0.332294
	ABL2	0.379602
	ABL3	0.440415
	CSE1		-0.0886387
	CSE2		0.220748
	CSE3		0.880751
	ES1			0.52267
	ES2			0.592548
	PEOU1				0.52731
	PEOU2				0.401026
	PEOU3				0.314162
	PN1					0.183573
	PN2					0.377028
	PN3					0.265558
	PN4					0.478633
	PU1						0.650917
	PU2						0.243716
	PU3						0.554591
	SN1								0.618721
	SN2								0.459095
	SN3								-1.28745
	SS1							0.375452
	SS2							0.465135
	SS3							0.491337
	List
		Outer weights
	ABL1 <- Attitude Toward Blended Learning (ABL)	0.332294
	ABL2 <- Attitude Toward Blended Learning (ABL)	0.379602
	ABL3 <- Attitude Toward Blended Learning (ABL)	0.440415
	CSE1 <- Computer Self-Efficency (CSE)	-0.0886387
	CSE2 <- Computer Self-Efficency (CSE)	0.220748
	CSE3 <- Computer Self-Efficency (CSE)	0.880751
	ES1 <- Education Sustainability (ES)	0.52267
	ES2 <- Education Sustainability (ES)	0.592548
	PEOU1 <- Perceived Ease of Use (PEOU)	0.52731
	PEOU2 <- Perceived Ease of Use (PEOU)	0.401026
	PEOU3 <- Perceived Ease of Use (PEOU)	0.314162
	PN1 <- Perceived Enjoyment (PEN)	0.183573
	PN2 <- Perceived Enjoyment (PEN)	0.377028
	PN3 <- Perceived Enjoyment (PEN)	0.265558
	PN4 <- Perceived Enjoyment (PEN)	0.478633
	PU1 <- Perecived Usefulness (PU)	0.650917
	PU2 <- Perecived Usefulness (PU)	0.243716
	PU3 <- Perecived Usefulness (PU)	0.554591
	SN1 <- Subjective Norm (SN)	0.618721
	SN2 <- Subjective Norm (SN)	0.459095
	SN3 <- Subjective Norm (SN)	-1.28745
	SS1 <- Student Satisfaction (SS)	0.375452
	SS2 <- Student Satisfaction (SS)	0.465135
	SS3 <- Student Satisfaction (SS)	0.491337
	Latent variables
	Scores
		Attitude Toward Blended Learning (ABL)	Computer Self-Efficency (CSE)	Education Sustainability (ES)	Perceived Ease of Use (PEOU)	Perceived Enjoyment (PEN)	Perecived Usefulness (PU)	Student Satisfaction (SS)	Subjective Norm (SN)
	0	1.43322	1.44232	1.43299	0.490363	1.78809	1.11522	0.680749	-0.147035
	1	-0.388022	-0.25712	1.43299	-0.379499	-0.250403	1.35872	-0.338192	-1.41363
	2	0.285292	-0.179661	0.891934	0.490363	0.136563	1.11522	0.224384	0.542303
	3	-0.625328	0.535499	-0.503779	-0.677914	0.12086	0.598723	0.224384	-2.92577
	4	-0.00449578	-0.371327	0.464606	-1.4807	-0.704904	0.842224	-0.45491	0.00699743
	5	-1.86699	-0.371327	0.0372777	-0.307679	-0.847441	0.842224	0.56403	1.47719
	6	-0.625328	-0.179661	-0.503779	-0.677914	0.286891	0.78755	-0.115263	0.542303
	7	0.403945	0.343833	0.464606	-0.837438	0.541593	0.78755	0.224384	-0.374277
	8	-0.702724	0.384544	-2.01322	-0.677914	0.160058	0.78755	-0.571629	0.00699743
	9	0.693733	0.535499	0.464606	0.490363	0.541593	0.78755	-0.207784	-0.497049
	10	-1.11117	-0.25712	-0.503779	-3.01447	-1.26817	0.78755	-2.59582	-0.374277
	11	0.403945	0.535499	0.464606	-1.84619	0.541593	0.216375	-0.77036	0.00699743
	12	-1.24616	-1.35561	-1.04484	0.351472	-0.28417	-0.300125	0.680749	-0.188985
	13	-0.584071	-1.27815	-1.47216	0.191948	-1.56987	-0.300125	-0.55953	0.819108
	14	-1.2823	-1.91982	-0.503779	-2.41764	0.0959183	-0.300125	-0.55953	1.73569
	15	-0.625328	-0.371327	-0.503779	-0.173537	-0.704904	-0.300125	0.66865	0.00699743
	16	-0.258144	0.985497	0.891934	-0.0140137	-0.777869	-0.300125	0.341102	1.73569
	17	-0.625328	-0.371327	-0.503779	-0.404881	-0.704904	-0.8713	0.001455	0.161029
	18	-0.00449578	0.612958	0.0372777	0.490363	0.541593	-0.732453	0.680749	-0.878323
	19	-2.68387	-2.18498	-2.44055	-0.0140137	-3.1979	-1.92948	-0.219883	0.469093
	20	-2.68387	-2.18498	-2.44055	0.490363	-2.37213	-0.161278	0.680749	0.469093
	21	-0.00449578	0.535499	0.464606	-1.54778	-0.28417	0.598723	-1.35554	-0.497049
	22	0.403945	0.535499	-0.503779	-1.84619	0.541593	1.11522	-1.79981	0.00699743
	23	-1.6546	-1.27815	-1.47216	-0.812055	-1.9514	1.35872	-0.688347	0.315061
	24	1.43322	1.44232	1.43299	0.191948	1.78809	1.35872	-0.55953	0.665076
	25	-1.98565	-1.35561	-2.44055	-2.00571	-0.489401	1.35872	0.118173	1.35441
	26	0.403945	0.535499	0.464606	0.927668	0.541593	-0.354799	0.680749	0.00699743
	27	0.403945	0.535499	0.464606	0.629254	0.541593	-1.33313	-0.55953	0.00699743
	28	0.403945	-0.25712	0.464606	0.994739	0.541593	-1.33313	-1.34344	0.00699743
	29	0.114157	0.535499	0.350877	0.994739	0.502394	-0.404779	-0.244081	0.00699743
	30	-0.00449578	0.535499	-0.503779	0.788777	0.12086	0.111722	-0.55953	-0.374277
	31	0.403945	0.535499	0.464606	0.788777	0.541593	-0.950778	-1.12051	-0.374277
	32	-0.625328	-0.371327	-0.503779	0.788777	-0.704904	0.598723	-0.55953	0.161029
	33	0.0729006	-0.599741	0.464606	0.788777	0.160058	0.842224	0.680749	1.32315
	34	0.403945	0.535499	0.464606	0.788777	0.541593	0.842224	-3.04009	0.00699743
	35	-0.743981	-0.25712	0.0372777	0.284401	-0.0451723	0.842224	-1.79981	1.04635
	36	-0.625328	-0.371327	-0.503779	-0.0140137	-0.704904	0.842224	0.797467	0.161029
	37	-1.81451	1.21391	-2.44055	-0.0140137	-1.60024	0.842224	0.236482	-0.570259
	38	0.403945	0.535499	0.464606	-0.0140137	0.541593	0.216375	-2.15155	0.00699743
	39	-1.48347	0.727165	-0.931107	-0.0140137	1.07449	0.459876	-0.219883	-0.374277
	40	0.403945	-0.640452	0.464606	-0.0140137	0.541593	-0.111299	0.341102	3.50633
	41	-0.294284	0.343833	-0.0764511	-0.51839	0.160058	-0.111299	-0.652051	-0.497049
	42	0.812386	-0.526245	0.464606	-0.173537	0.366735	-0.682474	0.236482	2.58975
	43	0.403945	-1.43307	0.0372777	-0.677914	-1.2378	-0.925974	-0.55953	0.696335
	44	1.43322	1.44232	1.43299	-0.543772	0.580792	-0.925974	-0.991698	-0.147035
	45	0.403945	0.612958	0.464606	0.490363	0.541593	0.325724	0.680749	-0.374277
	46	0.403945	0.535499	0.464606	0.696324	0.541593	0.325724	1.58138	0.00699743
	47	-0.625328	0.535499	-0.0764511	-0.883876	-0.299874	0.0822229	0.680749	0.00699743
	48	0.403945	0.535499	0.464606	-0.0140137	0.541593	-0.161278	0.341102	0.00699743
	49	0.403945	0.535499	0.464606	-0.379499	0.707625	-0.161278	0.107665	0.12977
	50	1.43322	1.44232	1.43299	-1.24936	1.78809	-0.161278	-1.46016	1.5504
	51	0.693733	0.535499	0.464606	1.36022	0.541593	0.355223	0.785368	0.00699743
	52	0.693733	0.535499	0.464606	0.490363	0.541593	-0.459453	0.680749	0.00699743
	53	-1.52472	-0.935532	-0.931107	0.490363	-0.997769	0.271049	0.680749	-1.10557
	54	-1.6546	-2.18498	-1.47216	0.490363	-1.9906	0.271049	-0.207784	0.469093
	55	-0.915116	0.421292	0.464606	0.490363	-0.704904	0.78755	0.680749	0.00699743
	56	1.43322	1.44232	1.43299	0.788777	1.78809	0.78755	0.680749	-0.147035
	57	0.326549	-0.371327	0.0372777	1.65864	-0.118138	0.78755	1.92103	0.542303
	58	-1.69586	-1.54728	-2.44055	0.490363	-1.2613	-0.0271254	0.680749	-0.847063
	59	0.403945	1.44232	0.464606	0.490363	1.36736	0.216375	0.680749	0.469093
	60	-2.68387	-2.18498	-2.44055	-3.01447	-3.1979	0.216375	-3.04009	0.469093
	61	0.403945	0.535499	0.464606	0.490363	0.541593	0.216375	0.680749	-0.497049
	62	0.403945	0.535499	0.464606	0.490363	0.541593	-0.300125	0.680749	-0.497049
	63	0.403945	0.535499	0.464606	0.490363	0.541593	-0.300125	0.680749	0.00699743
	64	0.403945	0.535499	0.464606	0.490363	-0.118138	-0.300125	-0.219883	0.00699743
	65	-0.625328	-0.371327	-0.503779	-0.677914	-0.704904	-0.816626	-0.55953	0.161029
	66	-1.6546	-1.27815	-1.47216	-1.84619	-1.9514	-0.245451	-1.79981	0.315061
	67	0.403945	0.343833	0.464606	0.124877	0.541593	-0.761952	0.680749	-0.374277
	68	0.403945	0.535499	0.464606	0.490363	0.541593	-1.52195	0.680749	0.00699743
	69	1.43322	0.649706	1.43299	1.36022	1.78809	-0.215952	1.92103	-0.147035
	70	0.734989	0.45804	1.43299	0.994739	1.12836	-0.459453	1.0204	-0.651081
	71	-0.589188	-1.84236	-1.35844	-0.404881	0.541593	-0.215952	0.680749	-2.64896
	72	1.43322	1.44232	-1.47216	-0.606094	0.190431	-0.215952	0.680749	-0.147035
	73	0.403945	1.44232	0.350877	0.490363	1.36736	0.544049	0.680749	-1.03235
	74	0.0729006	0.45804	0.350877	0.490363	1.36736	0.78755	0.680749	-2.803
	75	1.43322	-0.293868	1.43299	0.788777	0.630263	0.78755	0.680749	-1.5364
	76	0.285292	-0.102202	0.891934	0.788777	0.136563	1.35872	1.12502	-1.5364
	77	-0.956372	0.882083	-0.503779	0.788777	0.502394	1.35872	1.92103	-1.5364
	78	0.403945	0.535499	0.464606	-2.11922	0.541593	-3.72248	0.680749	0.00699743
	79	0.403945	0.535499	0.578335	0.490363	0.541593	0.271049	0.236482	0.00699743
	80	1.02478	0.421292	0.151006	0.788777	0.541593	0.271049	0.131863	0.00699743
	81	0.734989	-0.371327	-0.817379	0.490363	-0.704904	0.271049	-0.312404	0.161029
	82	0.403945	0.727165	-0.390051	0.490363	-0.339073	0.271049	-0.207784	0.892318
	83	0.155414	0.767876	-0.931107	-0.976329	-0.299874	-1.06013	0.131863	0.00699743
	84	0.693733	-0.142913	0.0372777	-0.950946	-0.250403	-2.3913	0.236482	-0.147035
	85	0.693733	1.44232	-0.0764511	0.284401	0.286891	-0.300125	0.680749	-0.147035
	86	-0.465418	1.51978	1.00566	-0.404881	0.707625	0.271049	-3.04009	0.892318
	87	1.14343	0.229626	-0.19018	0.994739	0.923128	1.60223	0.680749	0.787848
	88	1.14343	-0.371327	0.891934	0.490363	1.03529	1.60223	0.680749	-0.251505
	89	1.43322	1.32812	1.43299	-0.606094	0.438255	-1.44247	1.12502	-1.29086
	90	0.403945	-2.18498	0.464606	1.65864	0.541593	0.842224	-1.6815	3.12505
	91	0.403945	0.535499	0.0372777	0.490363	-0.720607	-3.72248	0.680749	0.00699743
	92	1.02478	0.535499	0.151006	0.490363	0.375561	0.271049	0.341102	0.00699743
	93	0.734989	0.535499	-0.817379	1.36022	0.0434975	0.271049	0.001455	-0.878323
	94	0.403945	0.535499	-0.390051	0.855848	-0.450202	0.271049	-0.338192	0.00699743
	95	0.155414	-0.371327	-1.47216	0.490363	0.541593	0.271049	-0.899177	0.665076
	96	0.693733	-1.27815	0.578335	-0.152905	-0.157337	-1.06013	-1.79981	2.46698
	97	0.693733	1.13645	1.00566	0.994739	-0.0216775	-2.3913	-0.115263	-1.15513
	98	-2.68387	0.535499	-2.44055	0.855848	0.692956	0.544049	0.797467	0.511044
	99	0.403945	-0.717912	-0.0764511	0.490363	0.923128	0.271049	0.680749	0.161029
	100	-0.625328	-0.526245	-0.390051	-1.02277	0.541593	0.271049	-0.652051	-0.147035
	101	-1.6546	-1.51053	1.43299	-0.950946	-1.08499	1.08572	0.131863	-1.50514
	102	0.0729006	-0.334579	-0.19018	-2.11922	-0.554576	0.51455	-0.312404	-0.147035
	103	0.812386	-2.11148	0.891934	-3.01447	-1.87843	0.871723	-0.338192	-0.651081
	104	0.812386	-0.526245	0.891934	0.490363	-0.577035	0.0275487	0.680749	-1.65917
	105	1.43322	-2.3399	0.891934	0.490363	-1.6575	-0.732453	1.13711	-1.60961
	106	-0.465418	-2.3399	1.00566	0.490363	-2.49897	-2.09313	-0.652051	0.437833
	107	0.403945	0.690417	-0.0764511	0.490363	0.502394	-1.30363	0.680749	0.469093
	108	1.14343	0.307085	1.00566	1.65864	0.502394	-2.09313	1.47676	0.469093
	Correlations
		Attitude Toward Blended Learning (ABL)	Computer Self-Efficency (CSE)	Education Sustainability (ES)	Perceived Ease of Use (PEOU)	Perceived Enjoyment (PEN)	Perecived Usefulness (PU)	Student Satisfaction (SS)	Subjective Norm (SN)
	Attitude Toward Blended Learning (ABL)	1	0.488529	0.728926	0.293492	0.624418	-0.139599	0.180111	-0.0493604
	Computer Self-Efficency (CSE)	0.488529	1	0.375723	0.220175	0.688632	-0.00422238	0.147879	-0.164533
	Education Sustainability (ES)	0.728926	0.375723	1	0.207696	0.522266	-0.0713128	0.112927	-0.0650362
	Perceived Ease of Use (PEOU)	0.293492	0.220175	0.207696	1	0.331773	-0.0269192	0.432661	-0.0400675
	Perceived Enjoyment (PEN)	0.624418	0.688632	0.522266	0.331773	1	0.123632	0.215043	-0.0465143
	Perecived Usefulness (PU)	-0.139599	-0.00422238	-0.0713128	-0.0269192	0.123632	1	-0.0724746	-0.0577229
	Student Satisfaction (SS)	0.180111	0.147879	0.112927	0.432661	0.215043	-0.0724746	1	-0.282074
	Subjective Norm (SN)	-0.0493604	-0.164533	-0.0650362	-0.0400675	-0.0465143	-0.0577229	-0.282074	1
	Covariances
		Attitude Toward Blended Learning (ABL)	Computer Self-Efficency (CSE)	Education Sustainability (ES)	Perceived Ease of Use (PEOU)	Perceived Enjoyment (PEN)	Perecived Usefulness (PU)	Student Satisfaction (SS)	Subjective Norm (SN)
	Attitude Toward Blended Learning (ABL)	1	0.488529	0.728926	0.293492	0.624418	-0.139599	0.180111	-0.0493604
	Computer Self-Efficency (CSE)	0.488529	1	0.375723	0.220175	0.688632	-0.00422238	0.147879	-0.164533
	Education Sustainability (ES)	0.728926	0.375723	1	0.207696	0.522266	-0.0713128	0.112927	-0.0650362
	Perceived Ease of Use (PEOU)	0.293492	0.220175	0.207696	1	0.331773	-0.0269192	0.432661	-0.0400675
	Perceived Enjoyment (PEN)	0.624418	0.688632	0.522266	0.331773	1	0.123632	0.215043	-0.0465143
	Perecived Usefulness (PU)	-0.139599	-0.00422238	-0.0713128	-0.0269192	0.123632	1	-0.0724746	-0.0577229
	Student Satisfaction (SS)	0.180111	0.147879	0.112927	0.432661	0.215043	-0.0724746	1	-0.282074
	Subjective Norm (SN)	-0.0493604	-0.164533	-0.0650362	-0.0400675	-0.0465143	-0.0577229	-0.282074	1
	Descriptives
		Mean	Median	Observed min	Observed max	Standard deviation	Excess kurtosis	Skewness	Number of observations used	Cramér-von Mises test statistic	Cramér-von Mises p value
	Attitude Toward Blended Learning (ABL)	1.24263e-16	0.403945	-2.68387	1.43322	1	0.366839	-0.882098	109	0.681422	8.20341e-08
	Computer Self-Efficency (CSE)	-1.67552e-16	0.421292	-2.3399	1.51978	1	-0.10274	-0.758681	109	0.713218	4.87948e-08
	Education Sustainability (ES)	-1.22226e-17	0.350877	-2.44055	1.43299	1	0.356123	-0.865281	109	0.546577	9.93555e-07
	Perceived Ease of Use (PEOU)	-1.44635e-16	0.490363	-3.01447	1.65864	1	1.13155	-1.13416	109	0.752514	2.66228e-08
	Perceived Enjoyment (PEN)	1.14078e-16	0.286891	-3.1979	1.78809	1	1.15725	-0.939556	109	0.659632	1.18899e-07
	Perecived Usefulness (PU)	1.99636e-16	0.216375	-3.72248	1.60223	1	2.45623	-1.27489	109	0.36347	6.24466e-05
	Student Satisfaction (SS)	-5.29648e-17	0.224384	-3.04009	1.92103	1	1.29503	-1.008	109	0.589029	4.30642e-07
	Subjective Norm (SN)	2.38341e-16	0.00699743	-2.92577	3.50633	1	2.70461	0.305822	109	0.673532	9.36997e-08
	Residuals
	Outer model scores
	Case index	ABL1	ABL2	ABL3	CSE1	CSE2	CSE3	ES1	ES2	PEOU1	PEOU2	PEOU3	PN1	PN2	PN3	PN4	PU1	PU2	PU3	SN1	SN2	SN3	SS1	SS2	SS3
	0	0.065543	-0.0907164	0.0287378	0.665764	0.302066	-0.00870625	-0.0038742	0.00341732	0.0143255	0.0379007	-0.0724249	-0.0142884	0.0126079	-0.0150623	0.00390563	0.253855	-1.00708	0.144618	1.33237	1.3409	1.11847	0.0204668	-0.0725961	0.0530851
	1	-1.99122	-0.204746	1.67885	0.481081	0.692232	-0.125082	-0.0038742	0.00341732	-0.173696	-0.154604	0.488894	-1.16941	1.54351	0.587088	-1.09307	0.0790179	-0.123785	-0.0383447	0.792562	-0.255095	0.289924	-2.01599	0.750142	0.830366
	2	0.967863	0.0646743	-0.785997	-0.424207	0.634874	-0.201815	0.47338	-0.417555	0.0143255	0.0379007	-0.0724249	-0.560761	-0.771004	-0.773675	1.25166	0.253855	-1.00708	0.144618	-0.446533	0.475041	-0.0451977	0.323883	-0.685252	0.401215
	3	-0.0605181	0.00765951	0.0390591	0.159642	0.105305	-0.0103268	0.0693321	-0.0611559	0.089941	0.0920115	-0.268415	0.35569	0.252742	0.286627	-0.494537	0.62471	-0.761418	-0.398608	-1.32328	-0.177511	-0.699241	0.323883	-0.685252	0.401215
	4	0.323565	0.324055	-0.523438	-0.346479	-0.0914562	-0.0119473	0.032729	-0.0288693	-0.157335	0.755454	-0.700252	0.0824538	-0.139065	-0.0926798	0.129341	0.449873	0.121881	-0.581571	0.484287	0.502506	0.411929	-1.03375	-0.13676	0.919403
	5	-0.828684	-0.625131	1.16405	-0.346479	-0.0914562	-0.0119473	-0.407922	0.359816	0.719362	-2.03671	1.39242	0.191409	-0.0320196	1.07027	-0.642002	0.449873	0.121881	-0.581571	-0.649401	-2.06439	-1.04824	1.0027	-0.959499	0.142122
	6	-0.0605181	0.00765951	0.0390591	-0.424207	0.634874	-0.201815	0.0693321	-0.0611559	0.089941	0.0920115	-0.268415	1.13322	0.128052	0.152258	-0.619977	-0.388363	0.147886	0.390828	-0.446533	0.475041	-0.0451977	-0.354935	-0.411006	0.660309
	7	0.00251246	-0.0415284	0.0338984	0.237371	-0.621025	0.17954	0.032729	-0.0288693	1.18738	-0.687531	-1.11535	0.0340827	-0.0632284	-0.0538711	0.0666234	-0.388363	0.147886	0.390828	0.567023	-0.308421	0.162519	0.323883	-0.685252	0.401215
	8	0.000318782	0.949018	-0.818216	-2.40077	-1.51943	0.139211	0.583189	-0.514414	0.089941	0.0920115	-0.268415	0.325727	-0.788649	0.254903	0.35488	-0.388363	0.147886	0.390828	0.484287	0.502506	0.411929	-0.0515188	-1.02366	1.00844
	9	0.64681	-0.300909	-0.22866	0.159642	0.105305	-0.0103268	0.032729	-0.0288693	0.0143255	0.0379007	-0.0724249	0.0340827	-0.0632284	-0.0538711	0.0666234	-0.388363	0.147886	0.390828	-0.220994	0.528368	0.0822074	0.611212	0.644845	-1.07751
	10	0.321371	1.3146	-1.37555	0.481081	0.692232	-0.125082	0.0693321	-0.0611559	0.241172	0.200233	-0.660395	0.513016	0.28395	1.41077	-1.20316	-0.388363	0.147886	0.390828	0.567023	-0.308421	0.162519	-0.514994	-0.370385	0.744162
	11	0.00251246	-0.0415284	0.0338984	0.159642	0.105305	-0.0103268	0.032729	-0.0288693	0.165556	0.146122	-0.464405	0.0340827	-0.0632284	-0.0538711	0.0666234	-0.855745	0.419558	0.820002	0.484287	0.502506	0.411929	-1.72866	2.08024	-0.648359
	12	-0.444601	-0.308736	0.601556	0.0526884	-0.230859	0.0631643	0.546586	-0.482128	-0.819479	1.06406	0.017201	-0.239154	-0.455035	-0.433178	0.690502	-0.48489	0.665225	0.276775	-1.91716	-1.14842	-1.33087	0.0204668	-0.0725961	0.0530851
	13	-0.965031	0.842816	0.00167905	-0.8526	-0.288217	-0.0135679	0.105935	-0.0934425	0.277963	0.284517	-0.829734	-0.160819	0.51052	-0.440263	-0.0961973	-0.48489	0.665225	0.276775	-0.506599	-1.20014	-0.671423	-0.0595628	-0.0522855	0.0950117
	14	-1.28828	1.46778	-0.293099	2.02925	1.92344	-0.277861	0.0693321	-0.0611559	-0.286102	-0.292999	0.854224	0.374755	-2.76438	1.3544	1.28237	-0.48489	0.665225	0.276775	-1.52015	-0.416678	-0.87914	-0.0595628	-0.0522855	0.0950117
	15	-0.0605181	0.00765951	0.0390591	-0.346479	-0.0914562	-0.0119473	0.0693321	-0.0611559	0.600854	-0.324815	-0.593887	0.0824538	-0.139065	-0.0926798	0.129341	-0.48489	0.665225	0.276775	0.484287	0.502506	0.411929	0.0285108	-1.04397	0.966513
	16	0.522943	-1.19308	0.633776	-2.64448	-2.83269	0.443834	0.47338	-0.417555	-0.496587	0.454727	0.253048	1.04268	-1.09622	-1.08122	1.0635	-0.48489	0.665225	0.276775	-1.52015	-0.416678	-0.87914	-0.658352	0.20165	0.312179
	17	-0.0605181	0.00765951	0.0390591	-0.346479	-0.0914562	-0.0119473	0.0693321	-0.0611559	0.805237	0.777748	-2.34435	0.0824538	-0.139065	-0.0926798	0.129341	-0.952271	0.936897	0.705948	-0.363796	-0.335886	-0.294608	-1.33717	0.475896	0.571273
	18	0.323565	0.324055	-0.523438	-0.745646	0.0479469	-0.087059	-0.407922	0.359816	0.0143255	0.0379007	-0.0724249	0.0340827	-0.0632284	-0.0538711	0.0666234	0.70302	-1.12738	-0.329697	-0.138258	-0.28256	-0.167203	0.0204668	-0.0725961	0.0530851
	19	-0.186579	0.106035	0.0493804	-1.35872	-0.484978	-0.0151884	0.142538	-0.125729	-0.496587	0.454727	0.253048	0.179196	-0.290737	-0.170297	0.254777	-1.06998	-0.558031	1.50105	-2.05996	-2.01267	-1.70768	0.619256	-0.326532	-0.164082
	20	-0.186579	0.106035	0.0493804	-1.35872	-0.484978	-0.0151884	0.142538	-0.125729	0.0143255	0.0379007	-0.0724249	0.452432	0.101069	0.209009	-0.369102	1.1704	-1.39905	-0.758871	-2.05996	-2.01267	-1.70768	0.0204668	-0.0725961	0.0530851
	21	0.323565	0.324055	-0.523438	0.159642	0.105305	-0.0103268	0.032729	-0.0288693	-0.0980806	-0.100494	0.292904	-0.239154	-0.455035	-0.433178	0.690502	0.62471	-0.761418	-0.398608	-0.220994	0.528368	0.0822074	-0.434965	-0.390696	0.702236
	22	0.00251246	-0.0415284	0.0338984	0.159642	0.105305	-0.0103268	0.0693321	-0.0611559	0.165556	0.146122	-0.464405	0.0340827	-0.0632284	-0.0538711	0.0666234	0.253855	-1.00708	0.144618	0.484287	0.502506	0.411929	-0.139592	-0.031975	0.136938
	23	-0.123549	0.0568475	0.0442197	-0.8526	-0.288217	-0.0135679	0.105935	-0.0934425	0.208449	-1.61988	1.7179	0.130825	-0.214901	-0.131489	0.192059	0.0790179	-0.123785	-0.0383447	-1.21188	-1.17428	-1.00114	0.930716	-1.91057	1.09748
	24	0.065543	-0.0907164	0.0287378	0.665764	0.302066	-0.00870625	-0.0038742	0.00341732	0.277963	0.284517	-0.829734	-0.0142884	0.0126079	-0.0150623	0.00390563	0.0790179	-0.123785	-0.0383447	0.341485	-0.361748	0.0351136	-0.0595628	-0.0522855	0.0950117
	25	0.136667	-0.518928	0.344158	0.0526884	-0.230859	0.0631643	0.142538	-0.125729	1.263	-0.63342	-1.31134	-0.986724	0.711045	-0.267085	-0.0334751	0.0790179	-0.123785	-0.0383447	-1.43742	-1.22761	-1.12855	-2.31941	1.3628	0.482236
	26	0.00251246	-0.0415284	0.0338984	0.159642	0.105305	-0.0103268	0.032729	-0.0288693	0.584493	-1.23487	0.595258	0.0340827	-0.0632284	-0.0538711	0.0666234	-1.32313	0.69123	1.24917	0.484287	0.502506	0.411929	0.0204668	-0.0725961	0.0530851
	27	0.00251246	-0.0415284	0.0338984	0.159642	0.105305	-0.0103268	0.032729	-0.0288693	0.84813	-0.988258	-0.162051	0.0340827	-0.0632284	-0.0538711	0.0666234	0.256819	1.15656	-0.809677	0.484287	0.502506	0.411929	-0.0595628	-0.0522855	0.0950117
	28	0.00251246	-0.0415284	0.0338984	0.481081	0.692232	-0.125082	0.032729	-0.0288693	0.525238	-0.378926	-0.397897	0.0340827	-0.0632284	-0.0538711	0.0666234	0.256819	1.15656	-0.809677	0.484287	0.502506	0.411929	-0.443009	0.580681	-0.211192
	29	-0.641786	0.217852	0.296457	0.159642	0.105305	-0.0103268	0.950633	-0.838526	0.525238	-0.378926	-0.397897	0.064046	0.978162	-0.0221478	-0.782794	1.34524	-2.28235	-0.575907	0.484287	0.502506	0.411929	0.635344	-2.26929	1.66277
	30	0.323565	0.324055	-0.523438	0.159642	0.105305	-0.0103268	0.0693321	-0.0611559	-0.249312	-0.208715	0.684884	0.35569	0.252742	0.286627	-0.494537	0.974383	-2.52802	-0.0326813	0.567023	-0.308421	0.162519	-0.0595628	-0.0522855	0.0950117
	31	0.00251246	-0.0415284	0.0338984	0.159642	0.105305	-0.0103268	0.032729	-0.0288693	-0.249312	-0.208715	0.684884	0.0340827	-0.0632284	-0.0538711	0.0666234	1.73727	-0.024418	-2.02829	0.567023	-0.308421	0.162519	1.21804	-0.580467	-0.381249
	32	-0.0605181	0.00765951	0.0390591	-0.346479	-0.0914562	-0.0119473	0.0693321	-0.0611559	-0.249312	-0.208715	0.684884	0.0824538	-0.139065	-0.0926798	0.129341	0.62471	-0.761418	-0.398608	-0.363796	-0.335886	-0.294608	-0.0595628	-0.0522855	0.0950117
	33	0.262728	-0.617304	0.333837	-2.0016	-1.65883	0.214323	0.032729	-0.0288693	-0.249312	-0.208715	0.684884	0.325727	-0.788649	0.254903	0.35488	0.449873	0.121881	-0.581571	0.198682	-1.226	-0.341702	0.0204668	-0.0725961	0.0530851
	34	0.00251246	-0.0415284	0.0338984	0.159642	0.105305	-0.0103268	0.032729	-0.0288693	-0.249312	-0.208715	0.684884	0.0340827	-0.0632284	-0.0538711	0.0666234	0.449873	0.121881	-0.581571	0.484287	0.502506	0.411929	-0.219622	-0.0116644	0.178865
	35	0.904832	0.113862	-0.780836	0.481081	0.692232	-0.125082	-0.407922	0.359816	-0.760224	0.208112	1.01036	-0.421843	0.377431	0.420995	-0.369097	0.449873	0.121881	-0.581571	0.258748	0.44918	0.284524	-0.139592	-0.031975	0.136938
	36	-0.0605181	0.00765951	0.0390591	-0.346479	-0.0914562	-0.0119473	0.0693321	-0.0611559	-0.496587	0.454727	0.253048	0.0824538	-0.139065	-0.0926798	0.129341	0.449873	0.121881	-0.581571	-0.363796	-0.335886	-0.294608	-0.961768	0.814306	-0.0359515
	37	1.74631	-0.672106	-0.738295	-0.989357	-1.26531	0.217564	0.142538	-0.125729	-0.496587	0.454727	0.253048	-1.04205	0.533329	1.6795	-0.952283	0.449873	0.121881	-0.581571	-1.83442	-1.95935	-1.58028	0.315839	0.286125	-0.512212
	38	0.00251246	-0.0415284	0.0338984	0.159642	0.105305	-0.0103268	0.032729	-0.0288693	-0.496587	0.454727	0.253048	0.0340827	-0.0632284	-0.0538711	0.0666234	-0.855745	0.419558	0.820002	0.484287	0.502506	0.411929	-0.810367	-0.729106	1.30946
	39	1.4861	-0.0963302	-1.03823	0.0819141	0.831635	-0.200194	-0.371318	0.327529	-0.496587	0.454727	0.253048	-1.27771	-0.463434	0.56245	0.543042	-1.03058	1.30286	0.637038	0.567023	-0.308421	0.162519	0.619256	-0.326532	-0.164082
	40	0.00251246	-0.0415284	0.0338984	0.636538	-0.760429	0.254652	0.032729	-0.0288693	-0.496587	0.454727	0.253048	0.0340827	-0.0632284	-0.0538711	0.0666234	-1.49796	1.57453	1.06621	-0.275065	1.15345	0.279124	-0.658352	0.20165	0.312179
	41	-0.320733	0.583435	-0.26088	0.237371	-0.621025	0.17954	0.509983	-0.449841	-1.0075	0.871554	0.57852	0.325727	-0.788649	0.254903	0.35488	-1.49796	1.57453	1.06621	-0.220994	0.528368	0.0822074	0.906584	1.00357	-1.64281
	42	-0.31854	-0.407112	0.591235	1.4641	0.0232594	0.141517	0.032729	-0.0288693	0.600854	-0.324815	-0.593887	0.167744	1.08004	-2.00754	0.198732	-1.96534	1.8462	1.49538	0.738491	0.369992	0.48684	0.315839	0.286125	-0.512212
	43	0.00251246	-0.0415284	0.0338984	0.957977	-0.173502	0.139897	-0.407922	0.359816	0.089941	0.0920115	-0.268415	1.39425	0.261141	-0.709001	-0.347077	-1.79051	0.962902	1.67835	-1.29462	-0.363351	-0.751734	-0.0595628	-0.0522855	0.0950117
	44	0.065543	-0.0907164	0.0287378	0.665764	0.302066	-0.00870625	-0.0038742	0.00341732	-0.0285675	1.80391	-2.25473	0.00411936	-1.10462	-0.0855943	0.91604	-1.79051	0.962902	1.67835	1.33237	1.3409	1.11847	0.227766	1.27781	-1.38371
	45	0.00251246	-0.0415284	0.0338984	-0.745646	0.0479469	-0.087059	0.032729	-0.0288693	0.0143255	0.0379007	-0.0724249	0.0340827	-0.0632284	-0.0538711	0.0666234	0.820727	0.367548	-1.1248	0.567023	-0.308421	0.162519	0.0204668	-0.0725961	0.0530851
	46	0.00251246	-0.0415284	0.0338984	0.159642	0.105305	-0.0103268	0.032729	-0.0288693	0.788875	-0.13231	-1.15521	0.0340827	-0.0632284	-0.0538711	0.0666234	0.820727	0.367548	-1.1248	0.484287	0.502506	0.411929	-0.578322	0.181339	0.270252
	47	-0.0605181	0.00765951	0.0390591	0.159642	0.105305	-0.0103268	0.509983	-0.449841	-0.684609	0.262222	0.814367	0.677298	0.568711	0.627124	-1.0557	0.995564	-0.515751	-0.941834	0.484287	0.502506	0.411929	0.0204668	-0.0725961	0.0530851
	48	0.00251246	-0.0415284	0.0338984	0.159642	0.105305	-0.0103268	0.032729	-0.0288693	-0.496587	0.454727	0.253048	0.0340827	-0.0632284	-0.0538711	0.0666234	1.1704	-1.39905	-0.758871	0.484287	0.502506	0.411929	-0.658352	0.20165	0.312179
	49	0.00251246	-0.0415284	0.0338984	0.159642	0.105305	-0.0103268	0.032729	-0.0288693	-0.173696	-0.154604	0.488894	0.811616	-0.187918	-0.18824	-0.0588166	1.1704	-1.39905	-0.758871	1.2723	-0.334283	0.49224	1.30612	-1.57215	0.490252
	50	0.065543	-0.0907164	0.0287378	0.665764	0.302066	-0.00870625	-0.0038742	0.00341732	-0.361718	-0.34711	1.05021	-0.0142884	0.0126079	-0.0150623	0.00390563	1.1704	-1.39905	-0.758871	0.964029	0.423319	0.614245	0.539226	-0.306221	-0.122155
	51	0.64681	-0.300909	-0.22866	0.159642	0.105305	-0.0103268	0.032729	-0.0288693	0.202347	0.230406	-0.633744	0.0340827	-0.0632284	-0.0538711	0.0666234	0.799546	-1.64472	-0.215644	0.484287	0.502506	0.411929	-0.953724	-0.157071	0.877476
	52	0.64681	-0.300909	-0.22866	0.159642	0.105305	-0.0103268	0.032729	-0.0288693	0.0143255	0.0379007	-0.0724249	0.0340827	-0.0632284	-0.0538711	0.0666234	0.507002	-2.25635	0.396492	0.484287	0.502506	0.411929	0.0204668	-0.0725961	0.0530851
	53	2.39061	-0.931486	-1.00085	1.63008	2.06285	-0.352973	-0.371318	0.327529	0.0143255	0.0379007	-0.0724249	-1.50258	-0.931076	0.144335	1.22964	-0.0175087	0.393553	-0.152398	-0.903605	-1.93188	-1.12315	0.0204668	-0.0725961	0.0530851
	54	-0.123549	0.0568475	0.0442197	-1.35872	-0.484978	-0.0151884	0.105935	-0.0934425	0.0143255	0.0379007	-0.0724249	0.160788	0.82649	-0.0997653	-0.657358	-0.0175087	0.393553	-0.152398	-2.05996	-2.01267	-1.70768	0.611212	0.644845	-1.07751
	55	-0.704816	0.26704	0.301618	-0.667918	-0.678383	0.102808	0.032729	-0.0288693	0.0143255	0.0379007	-0.0724249	0.0824538	-0.139065	-0.0926798	0.129341	-0.388363	0.147886	0.390828	0.484287	0.502506	0.411929	0.0204668	-0.0725961	0.0530851
	56	0.065543	-0.0907164	0.0287378	0.665764	0.302066	-0.00870625	-0.0038742	0.00341732	-0.249312	-0.208715	0.684884	-0.0142884	0.0126079	-0.0150623	0.00390563	-0.388363	0.147886	0.390828	1.33237	1.3409	1.11847	0.0204668	-0.0725961	0.0530851
	57	0.0633494	0.89983	-0.823377	-0.346479	-0.0914562	-0.0119473	-0.407922	0.359816	-0.06129	-0.01621	0.123565	0.538379	-0.579724	-0.567546	0.565062	-0.388363	0.147886	0.390828	-0.446533	0.475041	-0.0451977	0.100496	-0.0929067	0.0111585
	58	0.780965	-0.778309	0.0815998	0.130417	-0.95719	0.253032	0.142538	-0.125729	0.0143255	0.0379007	-0.0724249	0.507759	0.278785	-1.73758	0.549706	-0.680908	-0.463741	1.00296	-1.77436	-0.284164	-0.954051	0.0204668	-0.0725961	0.0530851
	59	0.00251246	-0.0415284	0.0338984	0.665764	0.302066	-0.00870625	0.032729	-0.0288693	0.0143255	0.0379007	-0.0724249	0.307319	0.328578	0.325435	-0.557255	-0.855745	0.419558	0.820002	-2.05996	-2.01267	-1.70768	0.0204668	-0.0725961	0.0530851
	60	-0.186579	0.106035	0.0493804	-1.35872	-0.484978	-0.0151884	0.142538	-0.125729	0.241172	0.200233	-0.660395	0.179196	-0.290737	-0.170297	0.254777	-0.855745	0.419558	0.820002	-2.05996	-2.01267	-1.70768	-0.219622	-0.0116644	0.178865
	61	0.00251246	-0.0415284	0.0338984	0.159642	0.105305	-0.0103268	0.032729	-0.0288693	0.0143255	0.0379007	-0.0724249	0.0340827	-0.0632284	-0.0538711	0.0666234	-0.855745	0.419558	0.820002	-0.220994	0.528368	0.0822074	0.0204668	-0.0725961	0.0530851
	62	0.00251246	-0.0415284	0.0338984	0.159642	0.105305	-0.0103268	0.032729	-0.0288693	0.0143255	0.0379007	-0.0724249	0.0340827	-0.0632284	-0.0538711	0.0666234	-0.48489	0.665225	0.276775	-0.220994	0.528368	0.0822074	0.0204668	-0.0725961	0.0530851
	63	0.00251246	-0.0415284	0.0338984	0.159642	0.105305	-0.0103268	0.032729	-0.0288693	0.0143255	0.0379007	-0.0724249	0.0340827	-0.0632284	-0.0538711	0.0666234	-0.48489	0.665225	0.276775	0.484287	0.502506	0.411929	0.0204668	-0.0725961	0.0530851
	64	0.00251246	-0.0415284	0.0338984	0.159642	0.105305	-0.0103268	0.032729	-0.0288693	0.0143255	0.0379007	-0.0724249	0.538379	-0.579724	-0.567546	0.565062	-0.48489	0.665225	0.276775	0.484287	0.502506	0.411929	0.619256	-0.326532	-0.164082
	65	-0.0605181	0.00765951	0.0390591	-0.346479	-0.0914562	-0.0119473	0.0693321	-0.0611559	0.089941	0.0920115	-0.268415	0.0824538	-0.139065	-0.0926798	0.129341	-0.114035	0.910892	-0.266451	-0.363796	-0.335886	-0.294608	-0.0595628	-0.0522855	0.0950117
	66	-0.123549	0.0568475	0.0442197	-0.8526	-0.288217	-0.0135679	0.105935	-0.0934425	0.165556	0.146122	-0.464405	0.130825	-0.214901	-0.131489	0.192059	0.353346	0.63922	-0.695624	-1.21188	-1.17428	-1.00114	-0.139592	-0.031975	0.136938
	67	0.00251246	-0.0415284	0.0338984	0.237371	-0.621025	0.17954	0.032729	-0.0288693	0.337217	-0.571431	0.163422	0.0340827	-0.0632284	-0.0538711	0.0666234	0.724201	0.884887	-1.23885	0.567023	-0.308421	0.162519	0.0204668	-0.0725961	0.0530851
	68	0.00251246	-0.0415284	0.0338984	0.159642	0.105305	-0.0103268	0.032729	-0.0288693	0.0143255	0.0379007	-0.0724249	0.0340827	-0.0632284	-0.0538711	0.0666234	1.26989	0.247254	-1.59911	0.484287	0.502506	0.411929	0.0204668	-0.0725961	0.0530851
	69	0.065543	-0.0907164	0.0287378	0.987202	0.888993	-0.123462	-0.0038742	0.00341732	0.202347	0.230406	-0.633744	-0.0142884	0.0126079	-0.0150623	0.00390563	0.332165	-1.37305	0.213529	1.33237	1.3409	1.11847	0.100496	-0.0929067	0.0111585
	70	-0.257703	0.534247	-0.26604	1.06493	0.162663	0.0664054	-0.0038742	0.00341732	0.525238	-0.378926	-0.397897	0.490008	-0.503888	-0.528738	0.502344	0.507002	-2.25635	0.396492	0.62709	1.36676	0.788744	0.699285	-0.346842	-0.206009
	71	0.783158	-1.76886	0.933714	1.12396	1.86609	-0.354594	-0.811969	0.716215	0.805237	0.777748	-2.34435	0.0340827	-0.0632284	-0.0538711	0.0666234	0.332165	-1.37305	0.213529	-1.38335	-1.85269	-1.32547	0.0204668	-0.0725961	0.0530851
	72	0.065543	-0.0907164	0.0287378	0.665764	0.302066	-0.00870625	0.105935	-0.0934425	0.982999	-1.79009	0.635115	1.20696	-0.811459	-1.86486	1.21096	0.332165	-1.37305	0.213529	1.33237	1.3409	1.11847	0.0204668	-0.0725961	0.0530851
	73	0.00251246	-0.0415284	0.0338984	0.665764	0.302066	-0.00870625	0.950633	-0.838526	0.0143255	0.0379007	-0.0724249	0.307319	0.328578	0.325435	-0.557255	-0.213526	-0.735413	0.573792	0.709826	0.555833	0.539334	0.0204668	-0.0725961	0.0530851
	74	0.262728	-0.617304	0.333837	1.06493	0.162663	0.0664054	0.950633	-0.838526	0.0143255	0.0379007	-0.0724249	0.307319	0.328578	0.325435	-0.557255	-0.388363	0.147886	0.390828	-0.535263	-1.0143	-0.618929	0.0204668	-0.0725961	0.0530851
	75	0.065543	-0.0907164	0.0287378	-1.25177	-0.148814	-0.0886795	-0.0038742	0.00341732	-0.249312	-0.208715	0.684884	-1.84259	-0.129819	-0.125631	0.878664	-0.388363	0.147886	0.390828	0.00454503	0.581694	0.209613	0.0204668	-0.0725961	0.0530851
	76	0.967863	0.0646743	-0.785997	-1.3295	0.577516	-0.278547	0.47338	-0.417555	-0.249312	-0.208715	0.684884	-0.560761	-0.771004	-0.773675	1.25166	0.0790179	-0.123785	-0.0383447	0.00454503	0.581694	0.209613	-0.274906	-0.431317	0.618383
	77	0.199697	-0.568116	0.338998	-1.72866	0.716919	-0.353658	0.0693321	-0.0611559	-0.249312	-0.208715	0.684884	0.064046	0.978162	-0.0221478	-0.782794	0.0790179	-0.123785	-0.0383447	0.00454503	0.581694	0.209613	0.100496	-0.0929067	0.0111585
	78	0.00251246	-0.0415284	0.0338984	0.159642	0.105305	-0.0103268	0.032729	-0.0288693	-0.549739	-0.539615	1.61153	0.0340827	-0.0632284	-0.0538711	0.0666234	0.217422	-0.70433	0.0543328	0.484287	0.502506	0.411929	0.0204668	-0.0725961	0.0530851
	79	0.00251246	-0.0415284	0.0338984	0.159642	0.105305	-0.0103268	-0.885175	0.780788	0.0143255	0.0379007	-0.0724249	0.0340827	-0.0632284	-0.0538711	0.0666234	-0.0175087	0.393553	-0.152398	0.484287	0.502506	0.411929	0.315839	0.286125	-0.512212
	80	0.386595	0.274867	-0.528599	-0.667918	-0.678383	0.102808	-1.32583	1.16947	-0.249312	-0.208715	0.684884	0.0340827	-0.0632284	-0.0538711	0.0666234	-0.0175087	0.393553	-0.152398	0.484287	0.502506	0.411929	1.29003	0.370599	-1.3366
	81	-0.257703	0.534247	-0.26604	-0.346479	-0.0914562	-0.0119473	-1.28922	1.13719	0.0143255	0.0379007	-0.0724249	0.0824538	-0.139065	-0.0926798	0.129341	-0.0175087	0.393553	-0.152398	-0.363796	-0.335886	-0.294608	1.5854	0.72932	-1.9019
	82	0.00251246	-0.0415284	0.0338984	0.0819141	0.831635	-0.200194	-0.848572	0.748501	0.0143255	0.0379007	-0.0724249	0.707261	1.6101	0.658848	-1.90512	-0.0175087	0.393553	-0.152398	1.10683	1.28757	0.991061	0.611212	0.644845	-1.07751
	83	-1.5463	1.05301	0.259077	-2.55622	-0.0667687	-0.240523	-0.371318	0.327529	0.353578	0.338627	-1.02572	0.677298	0.568711	0.627124	-1.0557	0.0608017	0.0275921	-0.0834876	0.484287	0.502506	0.411929	1.29003	0.370599	-1.3366
	84	0.64681	-0.300909	-0.22866	1.30864	1.47592	-0.238217	-0.407922	0.359816	-0.625355	-0.593725	1.80752	-1.16941	1.54351	0.587088	-1.09307	0.139112	-0.338369	-0.0145774	1.33237	1.3409	1.11847	0.315839	0.286125	-0.512212
	85	0.64681	-0.300909	-0.22866	0.665764	0.302066	-0.00870625	0.509983	-0.449841	-0.760224	0.208112	1.01036	1.13322	0.128052	0.152258	-0.619977	-0.48489	0.665225	0.276775	1.33237	1.3409	1.11847	0.0204668	-0.0725961	0.0530851
	86	-1.93038	0.736613	0.821574	-0.239525	0.244708	-0.0854384	-0.444525	0.392103	0.805237	0.777748	-2.34435	0.811616	-0.187918	-0.18824	-0.0588166	-0.0175087	0.393553	-0.152398	1.10683	1.28757	0.991061	-0.219622	-0.0116644	0.178865
	87	-0.578755	0.168664	0.291296	-0.590189	-1.40471	0.292676	1.42789	-1.2595	0.525238	-0.378926	-0.397897	-0.257562	0.662192	-0.362646	-0.221633	-0.095819	0.759514	-0.221308	1.1295	-1.19854	0.115425	0.0204668	-0.0725961	0.0530851
	88	-0.578755	0.168664	0.291296	-0.346479	-0.0914562	-0.0119473	0.47338	-0.417555	0.0143255	0.0379007	-0.0724249	-1.24775	0.577957	0.594173	-0.306375	-0.095819	0.759514	-0.221308	1.35504	-1.14521	0.24283	0.0204668	-0.0725961	0.0530851
	89	0.065543	-0.0907164	0.0287378	-0.161797	-0.481622	0.104429	-0.0038742	0.00341732	0.982999	-1.79009	0.635115	0.113074	-0.997574	1.07735	0.144697	-1.41965	1.20857	1.13512	1.58058	-1.09188	0.370235	-0.274906	-0.431317	0.618383
	90	0.00251246	-0.0415284	0.0338984	-1.35872	-0.484978	-0.0151884	0.032729	-0.0288693	-0.06129	-0.01621	0.123565	0.0340827	-0.0632284	-0.0538711	0.0666234	0.449873	0.121881	-0.581571	-0.192329	0.342527	0.0297136	2.49565	-1.10865	-0.85751
	91	0.00251246	-0.0415284	0.0338984	0.159642	0.105305	-0.0103268	-0.407922	0.359816	0.0143255	0.0379007	-0.0724249	0.998905	0.884681	0.967622	-1.61686	0.217422	-0.70433	0.0543328	0.484287	0.502506	0.411929	0.0204668	-0.0725961	0.0530851
	92	0.386595	0.274867	-0.528599	0.159642	0.105305	-0.0103268	-1.32583	1.16947	0.0143255	0.0379007	-0.0724249	-0.743451	0.0614612	0.0804978	0.192063	-0.0175087	0.393553	-0.152398	0.484287	0.502506	0.411929	-0.658352	0.20165	0.312179
	93	-0.257703	0.534247	-0.26604	0.159642	0.105305	-0.0103268	-1.28922	1.13719	0.202347	0.230406	-0.633744	-2.29852	0.31084	0.349235	0.442943	-0.0175087	0.393553	-0.152398	-0.138258	-0.28256	-0.167203	-1.33717	0.475896	0.571273
	94	0.00251246	-0.0415284	0.0338984	0.159642	0.105305	-0.0103268	-0.848572	0.748501	-0.308566	0.647233	-0.308272	-1.01669	-0.330345	-0.298809	0.815942	-0.0175087	0.393553	-0.152398	0.484287	0.502506	0.411929	-2.01599	0.750142	0.830366
	95	-1.5463	1.05301	0.259077	-0.346479	-0.0914562	-0.0119473	0.105935	-0.0934425	0.0143255	0.0379007	-0.0724249	0.0340827	-0.0632284	-0.0538711	0.0666234	-0.0175087	0.393553	-0.152398	0.341485	-0.361748	0.0351136	-0.738381	0.221961	0.354105
	96	0.64681	-0.300909	-0.22866	-0.8526	-0.288217	-0.0135679	-0.885175	0.780788	-1.33039	1.48089	0.342674	0.568343	0.461666	-0.535823	-0.284355	0.0608017	0.0275921	-0.0834876	-0.0495266	1.20678	0.406529	-0.139592	-0.031975	0.136938
	97	0.64681	-0.300909	-0.22866	-0.0840682	-1.20795	0.294296	-0.444525	0.392103	0.525238	-0.378926	-0.397897	0.464645	0.359787	1.44957	-1.26588	0.139112	-0.338369	-0.0145774	-0.0781912	1.39262	0.459023	-0.354935	-0.411006	0.660309
	98	-0.186579	0.106035	0.0493804	0.159642	0.105305	-0.0103268	0.142538	-0.125729	-0.308566	0.647233	-0.308272	-0.986066	-1.18885	0.871224	0.831298	-0.213526	-0.735413	0.573792	1.18957	0.476645	0.74165	-0.961768	0.814306	-0.0359515
	99	0.00251246	-0.0415284	0.0338984	1.54183	-0.703071	0.331384	0.509983	-0.449841	0.0143255	0.0379007	-0.0724249	-0.257562	0.662192	-0.362646	-0.221633	-0.0175087	0.393553	-0.152398	-0.363796	-0.335886	-0.294608	0.0204668	-0.0725961	0.0530851
	100	-0.0605181	0.00765951	0.0390591	1.4641	0.0232594	0.141517	-0.848572	0.748501	-1.51841	1.28838	0.903993	0.0340827	-0.0632284	-0.0538711	0.0666234	-0.0175087	0.393553	-0.152398	1.33237	1.3409	1.11847	0.906584	1.00357	-1.64281
	101	-0.123549	0.0568475	0.0442197	1.86327	-0.116144	0.216629	-0.0038742	0.00341732	-0.625355	-0.593725	1.80752	-0.531455	2.17029	-1.88026	-0.462528	0.275036	1.00518	-0.764534	-1.63156	0.58009	-0.577236	1.29003	0.370599	-1.3366
	102	0.262728	-0.617304	0.333837	1.38637	0.74959	-0.0483502	1.42789	-1.2595	-0.549739	-0.539615	1.61153	1.77644	0.759992	0.833253	-1.7423	-0.192346	1.27685	-0.335361	1.33237	1.3409	1.11847	1.5854	0.72932	-1.9019
	103	-0.31854	-0.407112	0.591235	2.10698	1.19711	-0.0879942	0.47338	-0.417555	0.241172	0.200233	-0.660395	-0.829398	0.742254	0.857053	-0.7421	0.428692	-1.89038	0.327582	0.62709	1.36676	0.788744	-2.01599	0.750142	0.830366
	104	-0.31854	-0.407112	0.591235	1.4641	0.0232594	0.141517	0.47338	-0.417555	0.0143255	0.0379007	-0.0724249	-1.82418	-1.24705	-0.196163	1.7908	0.157328	-0.489746	0.0305655	-0.783472	1.41848	0.129301	0.0204668	-0.0725961	0.0530851
	105	0.065543	-0.0907164	0.0287378	0.451856	-0.370263	0.138276	0.47338	-0.417555	0.0143255	0.0379007	-0.0724249	-0.998279	-1.44757	-0.369341	1.72808	0.70302	-1.12738	-0.329697	-1.60889	-1.90602	-1.45287	-0.28295	0.54006	-0.295045
	106	-1.93038	0.736613	0.821574	0.451856	-0.370263	0.138276	-0.444525	0.392103	0.0143255	0.0379007	-0.0724249	-0.355064	-0.815632	0.311655	0.605755	0.802511	0.518926	-1.16994	-0.423863	-2.01107	-0.920833	0.906584	1.00357	-1.64281
	107	0.00251246	-0.0415284	0.0338984	-1.65093	-0.00941086	-0.163791	0.509983	-0.449841	0.0143255	0.0379007	-0.0724249	0.064046	0.978162	-0.0221478	-0.782794	0.235639	-0.855707	0.0994756	-2.05996	-2.01267	-1.70768	0.0204668	-0.0725961	0.0530851
	108	-0.578755	0.168664	0.291296	-1.49548	-1.46207	0.215943	-0.444525	0.392103	-0.06129	-0.01621	0.123565	0.064046	0.978162	-0.0221478	-0.782794	0.802511	0.518926	-1.16994	-2.05996	-2.01267	-1.70768	0.395869	0.265814	-0.554139
	Outer model correlations
		ABL1	ABL2	ABL3	CSE1	CSE2	CSE3	ES1	ES2	PEOU1	PEOU2	PEOU3	PN1	PN2	PN3	PN4	PU1	PU2	PU3	SN1	SN2	SN3	SS1	SS2	SS3
	ABL1	1	-0.519254	-0.630522	0.0603031	0.10587	-0.0898841	-0.0462862	0.0462862	-0.190535	0.0617675	0.13802	-0.11411	-0.0524808	-0.0319052	0.10061	-0.00717341	-0.101663	0.0684371	-0.0628903	0.0509575	-0.0150145	0.0175035	-0.0921354	0.0641282
	ABL2	-0.519254	1	-0.33593	-0.125274	-0.0126259	-0.0687538	-0.103062	0.103062	0.00486095	0.0422137	-0.04472	0.0678061	-0.161406	0.141392	0.0322155	-0.0159976	0.0834576	-0.0290858	0.121876	0.0858522	0.116015	0.06871	-0.0366531	-0.0289968
	ABL3	-0.630522	-0.33593	1	0.0473142	-0.105214	0.161505	0.144614	-0.144614	0.205577	-0.106413	-0.111499	0.0641798	0.20443	-0.0932497	-0.140142	0.022435	0.0362477	-0.0490095	-0.0413768	-0.134132	-0.0888179	-0.0816938	0.134832	-0.0443414
	CSE1	0.0603031	-0.125274	0.0473142	1	0.585763	-0.0488411	0.00234832	-0.00234832	-0.00983845	-0.0421563	0.0497897	-0.122988	0.0295832	0.00265114	0.0216163	-0.0662898	-0.0419281	0.10663	0.25792	0.318762	0.310057	-0.0822348	0.182986	-0.0854556
	CSE2	0.10587	-0.0126259	-0.105214	0.585763	1	-0.838124	-0.13876	0.13876	0.0141221	0.00249177	-0.0168814	-0.154076	0.022845	0.18665	-0.0528332	0.0617684	-0.181828	0.0300482	0.244196	0.236008	0.262581	-0.0654114	0.0479645	0.0163149
	CSE3	-0.0898841	-0.0687538	0.161505	-0.0488411	-0.838124	1	0.172583	-0.172583	-0.0240251	-0.0314432	0.054314	0.107103	-0.00824286	-0.228236	0.079658	-0.120736	0.195859	0.0347352	-0.127349	-0.0763099	-0.114916	0.0252639	0.0640456	-0.0776201
	ES1	-0.0462862	-0.103062	0.144614	0.00234832	-0.13876	0.172583	1	-1	0.0320273	-0.120402	0.0803104	0.148849	-0.0239535	-0.0466796	-0.0139445	-0.0181951	-0.0804117	0.0696325	-0.0295027	-0.0678347	-0.0502377	-0.0240618	-0.199101	0.19321
	ES2	0.0462862	0.103062	-0.144614	-0.00234832	0.13876	-0.172583	-1	1	-0.0320273	0.120402	-0.0803104	-0.148849	0.0239535	0.0466796	0.0139445	0.0181951	0.0804117	-0.0696325	0.0295027	0.0678347	0.0502377	0.0240618	0.199101	-0.19321
	PEOU1	-0.190535	0.00486095	0.205577	-0.00983845	0.0141221	-0.0240251	0.0320273	-0.0320273	1	-0.487774	-0.570465	0.0347637	-0.0120115	-0.0526248	0.0225938	-0.0277681	-0.0516935	0.0646603	0.0385524	-0.158202	-0.0505754	-0.171789	-0.159505	0.289419
	PEOU2	0.0617675	0.0422137	-0.106413	-0.0421563	0.00249177	-0.0314432	-0.120402	0.120402	-0.487774	1	-0.438731	-0.0596073	-0.078142	0.0077563	0.0806811	-0.142635	0.0553695	0.144148	-0.0830256	0.100671	-0.00409612	-0.172825	0.352779	-0.15214
	PEOU3	0.13802	-0.04472	-0.111499	0.0497897	-0.0168814	0.054314	0.0803104	-0.0803104	-0.570465	-0.438731	1	0.0202957	0.0858833	0.0468735	-0.0991653	0.162781	0.0011186	-0.20218	0.0384284	0.0681349	0.0559151	0.339436	-0.167716	-0.154783
	PN1	-0.11411	0.0678061	0.0641798	-0.122988	-0.154076	0.107103	0.148849	-0.148849	0.0347637	-0.0596073	0.0202957	1	0.0257119	-0.0914241	-0.35239	-0.0744809	3.29129e-05	0.0921893	0.0554078	0.140424	0.100483	0.297385	-0.175032	-0.111342
	PN2	-0.0524808	-0.161406	0.20443	0.0295832	0.022845	-0.00824286	-0.0239535	0.0239535	-0.0120115	-0.078142	0.0858833	0.0257119	1	-0.00173776	-0.802785	0.130748	-0.0183573	-0.151114	0.0406183	0.0425107	0.0452087	0.0327957	0.0603808	-0.0811035
	PN3	-0.0319052	0.141392	-0.0932497	0.00265114	0.18665	-0.228236	-0.0466796	0.0466796	-0.0526248	0.0077563	0.0468735	-0.0914241	-0.00173776	1	-0.46158	0.109457	-0.0265414	-0.119961	0.145189	-0.10411	0.0410333	-0.0549526	0.0193109	0.0318311
	PN4	0.10061	0.0322155	-0.140142	0.0216163	-0.0528332	0.079658	-0.0139445	0.0139445	0.0225938	0.0806811	-0.0991653	-0.35239	-0.802785	-0.46158	1	-0.130145	0.0277658	0.144856	-0.12539	-0.0349637	-0.0942339	-0.110951	0.00852147	0.0905835
	PU1	-0.00717341	-0.0159976	0.022435	-0.0662898	0.0617684	-0.120736	-0.0181951	0.0181951	-0.0277681	-0.142635	0.162781	-0.0744809	0.130748	0.109457	-0.130145	1	-0.603836	-0.884278	0.0467056	-0.0593761	0.0010123	0.0943957	-0.216486	0.103655
	PU2	-0.101663	0.0834576	0.0362477	-0.0419281	-0.181828	0.195859	-0.0804117	0.0804117	-0.0516935	0.0553695	0.0011186	3.29129e-05	-0.0183573	-0.0265414	0.0277658	-0.603836	1	0.16174	-0.0391767	-0.0707522	-0.0576116	0.0588217	0.273064	-0.287779
	PU3	0.0684371	-0.0290858	-0.0490095	0.10663	0.0300482	0.0347352	0.0696325	-0.0696325	0.0646603	0.144148	-0.20218	0.0921893	-0.151114	-0.119961	0.144856	-0.884278	0.16174	1	-0.0348719	0.114957	0.0324967	-0.151322	0.108047	0.0402598
	SN1	-0.0628903	0.121876	-0.0413768	0.25792	0.244196	-0.127349	-0.0295027	0.0295027	0.0385524	-0.0830256	0.0384284	0.0554078	0.0406183	0.145189	-0.12539	0.0467056	-0.0391767	-0.0348719	1	0.673929	0.93755	-0.0247535	0.00761394	0.0152752
	SN2	0.0509575	0.0858522	-0.134132	0.318762	0.236008	-0.0763099	-0.0678347	0.0678347	-0.158202	0.100671	0.0681349	0.140424	0.0425107	-0.10411	-0.0349637	-0.0593761	-0.0707522	0.114957	0.673929	1	0.888833	-0.0366499	0.0581735	-0.0178926
	SN3	-0.0150145	0.116015	-0.0888179	0.310057	0.262581	-0.114916	-0.0502377	0.0502377	-0.0505754	-0.00409612	0.0559151	0.100483	0.0452087	0.0410333	-0.0942339	0.0010123	-0.0576116	0.0324967	0.93755	0.888833	1	-0.0326092	0.0321126	0.00104981
	SS1	0.0175035	0.06871	-0.0816938	-0.0822348	-0.0654114	0.0252639	-0.0240618	0.0240618	-0.171789	-0.172825	0.339436	0.297385	0.0327957	-0.0549526	-0.110951	0.0943957	0.0588217	-0.151322	-0.0247535	-0.0366499	-0.0326092	1	-0.344475	-0.585236
	SS2	-0.0921354	-0.0366531	0.134832	0.182986	0.0479645	0.0640456	-0.199101	0.199101	-0.159505	0.352779	-0.167716	-0.175032	0.0603808	0.0193109	0.00852147	-0.216486	0.273064	0.108047	0.00761394	0.0581735	0.0321126	-0.344475	1	-0.559635
	SS3	0.0641282	-0.0289968	-0.0443414	-0.0854556	0.0163149	-0.0776201	0.19321	-0.19321	0.289419	-0.15214	-0.154783	-0.111342	-0.0811035	0.0318311	0.0905835	0.103655	-0.287779	0.0402598	0.0152752	-0.0178926	0.00104981	-0.585236	-0.559635	1
	Outer model descriptives
		Mean	Median	Observed min	Observed max	Standard deviation	Excess kurtosis	Skewness	Number of observations used	Cramér-von Mises test statistic	Cramér-von Mises p value
	ABL1	4.7872e-17	0.00251246	-1.99122	2.39061	0.618171	4.23909	-0.260412	109	1.34648	7.37e-10
	ABL2	7.66461e-17	-0.0415284	-1.76886	1.46778	0.445925	3.50805	0.115897	109	1.16855	7.37e-10
	ABL3	-1.30884e-16	0.0338984	-1.37555	1.67885	0.423197	3.14927	0.116535	109	1.60642	7.37e-10
	CSE1	-1.07967e-16	0.159642	-2.64448	2.10698	0.914077	0.760039	-0.447526	109	0.485851	3.56281e-06
	CSE2	-3.05566e-17	0.105305	-2.83269	2.06285	0.672067	3.86045	-0.371261	109	0.823771	9.82717e-09
	CSE3	9.16698e-18	-0.0103268	-0.354594	0.443834	0.136684	1.40903	0.127722	109	1.48119	7.37e-10
	ES1	1.11022e-16	0.032729	-1.32583	1.42789	0.471106	2.18072	-0.309872	109	1.42347	7.37e-10
	ES2	-1.24263e-16	-0.0288693	-1.2595	1.16947	0.415549	2.18072	0.309872	109	1.42347	7.37e-10
	PEOU1	1.22226e-16	0.0143255	-1.51841	1.263	0.468509	1.20835	-0.0474648	109	0.460447	6.25329e-06
	PEOU2	5.60204e-18	0.0379007	-2.03671	1.80391	0.563054	3.71884	-0.655144	109	0.847325	7.27644e-09
	PEOU3	-1.7621e-16	-0.0724249	-2.34435	1.80752	0.763932	2.04538	-0.481108	109	0.455659	6.96582e-06
	PN1	9.87997e-17	0.0340827	-2.29852	1.77644	0.644745	2.15543	-0.807	109	1.21227	7.37e-10
	PN2	-1.16115e-16	-0.0632284	-2.76438	2.17029	0.660305	3.14974	-0.180385	109	0.671789	9.65143e-08
	PN3	-3.92143e-17	-0.0538711	-2.00754	1.6795	0.587402	3.27107	-0.454704	109	1.18876	7.37e-10
	PN4	-6.11132e-18	0.0666234	-1.90512	1.7908	0.655128	1.03194	-0.136168	109	0.671309	9.73049e-08
	PU1	2.03711e-17	0.0608017	-1.96534	1.73727	0.696029	0.513099	-0.423944	109	0.146676	0.0258382
	PU2	1.13059e-16	0.147886	-2.52802	1.8462	0.879642	0.42313	-0.777582	109	0.514372	1.93264e-06
	PU3	1.8334e-17	-0.0383447	-2.02829	1.67835	0.659862	0.683629	0.0253867	109	0.128256	0.0455989
	SN1	1.38523e-16	0.484287	-2.05996	1.58058	0.976172	-0.369507	-0.689797	109	0.612954	2.74431e-07
	SN2	-8.96327e-17	0.476645	-2.06439	1.41848	0.998683	-0.399836	-0.680678	109	0.852613	6.81517e-09
	SN3	3.66679e-17	0.209613	-1.70768	1.11847	0.756365	-0.00134088	-0.827274	109	0.831324	8.91052e-09
	SS1	1.78756e-16	0.0204668	-2.31941	2.49565	0.746973	2.14275	-0.290912	109	0.839425	8.03519e-09
	SS2	1.01855e-18	-0.0725961	-2.26929	2.08024	0.589943	3.50597	-0.348697	109	1.03795	1.08472e-09
	SS3	-1.8334e-17	0.0530851	-1.9019	1.66277	0.646596	1.57629	-0.903552	109	1.20013	7.37e-10
	Inner model scores
		Attitude Toward Blended Learning (ABL)	Education Sustainability (ES)	Perceived Ease of Use (PEOU)	Perecived Usefulness (PU)	Student Satisfaction (SS)
	0	1.40806	0.388281	-0.0998449	0.929191	0.293299
	1	-0.0937918	1.71583	-0.337845	1.26356	-0.692549
	2	0.285583	0.683977	0.454029	1.08887	0.330253
	3	-0.380696	-0.0479616	-0.788638	0.443905	-0.593205
	4	0.522748	0.467883	-1.24496	0.948992	-0.302445
	5	-1.70848	1.39818	0.0181508	1.09825	1.16712
	6	-0.337514	-0.0479616	-0.766284	0.723545	-0.0471492
	7	0.715241	0.17016	-1.02746	0.688112	0.00733897
	8	-0.389466	-1.50099	-0.724374	0.820839	-0.582359
	9	0.676046	-0.0410739	0.3013	0.714935	-0.445766
	10	-0.0637292	0.306178	-2.5917	1.02759	-2.4013
	11	0.965604	0.17016	-2.02129	0.182691	-0.866122
	12	-1.41611	-0.136478	0.413751	-0.500322	0.601872
	13	-0.642452	-1.04642	0.728976	-0.0857463	-0.0255207
	14	-0.646759	0.430922	-2.44643	-0.55374	-0.231151
	15	-0.654999	-0.0479616	0.0622122	-0.193357	0.821115
	16	-0.311972	1.0801	0.325775	0.215447	1.09666
	17	-0.629621	-0.0479616	-0.164863	-0.752635	0.197381
	18	-0.266892	0.0405548	0.292498	-0.819844	0.340727
	19	-2.91563	-0.484205	1.05623	-1.50611	0.559419
	20	-2.87293	-0.484205	1.27476	0.0552489	1.25266
	21	0.559532	0.467883	-1.451	0.732945	-1.38613
	22	1.13841	-0.798225	-2.02129	1.08154	-1.89557
	23	-1.22583	-0.266083	-0.156924	1.62974	-0.200733
	24	1.58783	0.388281	-0.375755	1.23542	-0.717838
	25	-1.28443	-0.993161	-1.82962	1.32914	0.52632
	26	0.0737549	0.17016	0.752574	-0.388483	0.584987
	27	0.0966412	0.17016	0.454159	-1.36681	-0.655292
	28	0.043161	0.17016	0.801606	-1.51695	-1.49588
	29	-0.188721	0.267665	0.833213	-0.428644	-0.329998
	30	-0.1687	-0.500502	0.748757	0.153974	-0.657201
	31	0.134593	0.17016	0.603117	-1.01391	-1.32386
	32	-0.727001	-0.0479616	1.0288	0.717389	-0.363604
	33	-0.0666584	0.411467	0.756389	0.790728	0.971004
	34	0.471841	0.17016	0.613683	0.80854	-3.13585
	35	-0.611117	0.579585	0.323181	0.885653	-1.51161
	36	-0.557922	-0.0479616	0.226004	0.960889	0.993393
	37	-1.71583	-1.11791	0.551742	1.42894	0.564282
	38	0.555414	0.17016	-0.189108	0.182691	-2.24732
	39	-1.40843	0.150229	-0.379778	0.299568	-0.54336
	40	0.374362	0.17016	-0.118902	-0.0974496	1.14862
	41	-0.134373	0.13806	-0.579744	-0.124653	-0.807912
	42	0.757717	-0.127563	-0.240697	-0.673988	0.837461
	43	0.496512	-0.257168	-0.262759	-0.833597	-0.154638
	44	1.51421	0.388281	-0.716067	-0.809604	-1.07593
	45	0.277419	0.17016	0.306465	0.277263	0.482946
	46	0.172437	0.17016	0.52123	0.29204	1.48562
	47	-0.417692	0.379367	-0.767692	0.259309	0.796326
	48	0.367945	0.17016	-0.189108	-0.194962	0.24534
	49	0.478148	0.17016	-0.608665	-0.227067	0.0048442
	50	1.82614	0.388281	-1.79253	-0.216205	-1.36867
	51	0.333855	-0.0410739	1.18513	0.321539	0.689606
	52	0.46639	-0.0410739	0.315268	-0.493137	0.584987
	53	-1.65827	0.180302	0.783819	0.258371	0.552513
	54	-1.73861	-0.266083	1.14269	0.39201	0.268299
	55	-0.982343	1.13166	0.744151	1.04445	0.889885
	56	1.28664	0.388281	0.19857	0.601517	0.293299
	57	-0.120489	-0.200752	1.70611	0.788691	2.07716
	58	-1.86769	-1.2044	0.868282	-0.0697052	0.647898
	59	0.263379	0.17016	0.0628678	0.183316	0.572812
	60	-1.68501	-0.484205	-1.94422	0.639739	-2.26079
	61	0.263379	0.17016	0.3013	0.14376	0.442767
	62	0.19706	0.17016	0.3013	-0.372741	0.442767
	63	0.19706	0.17016	0.315268	-0.333809	0.584987
	64	0.247275	0.17016	0.543638	-0.16856	-0.14995
	65	-0.518721	-0.0479616	-0.437896	-0.697961	-0.363604
	66	-1.09484	-0.266083	-1.19106	0.0255632	-1.31219
	67	0.234949	0.17016	-0.0651448	-0.86139	0.463704
	68	0.040177	0.17016	0.315268	-1.55564	0.584987
	69	0.936682	0.388281	0.751979	-0.552122	1.47691
	70	0.35459	0.897238	0.596534	-0.70561	0.586046
	71	-0.547209	-0.928961	-0.70769	-0.905187	-0.334422
	72	1.5287	-2.51687	-0.643262	-0.00180432	0.694559
	73	0.305452	0.0564312	0.0212615	0.395021	0.14917
	74	0.00567363	0.297738	-0.0502045	0.31532	-0.420802
	75	1.28664	0.388281	0.521346	0.45535	0.0679396
	76	0.187282	0.683977	0.696605	1.18649	0.649905
	77	-1.09876	0.193345	0.59237	1.2813	1.42441
	78	0.45155	0.17016	-2.29432	-3.75616	0.584987
	79	0.295169	0.283889	0.315268	0.237365	0.14072
	80	0.842482	-0.59598	0.611084	0.215733	0.0279352
	81	0.656817	-1.35313	0.730381	0.389715	-0.116478
	82	0.319939	-0.684496	0.64901	0.562639	0.18114
	83	0.271559	-1.04439	-0.854856	-0.839024	0.264054
	84	0.626372	-0.468402	-0.871595	-2.36701	0.247668
	85	0.541616	-0.582131	0.213842	-0.110139	0.670333
	86	-0.153453	1.34492	-0.590516	0.4506	-2.85738
	87	1.04669	-1.02366	0.702251	1.47535	0.687614
	88	1.18081	0.0584583	0.11657	1.25314	0.323217
	89	1.34645	0.388281	-0.763343	-1.40038	0.745682
	90	0.164786	0.17016	1.50804	0.534062	-1.092
	91	-0.242371	-0.257168	0.752186	-3.44001	0.901995
	92	0.910168	-0.59598	0.372741	0.278953	0.28704
	93	0.40801	-1.35313	1.33302	0.293748	-0.219006
	94	0.230023	-0.684496	1.02407	0.48579	-0.184859
	95	0.109957	-1.58545	0.312866	0.116424	-0.874095
	96	0.698619	0.0726549	-0.0591679	-1.07228	-1.15561
	97	0.128602	0.499983	0.996097	-2.25983	-0.35449
	98	-2.88606	-0.484205	0.642326	0.511383	0.805909
	99	0.270399	-0.370897	0.158941	-0.0837235	0.443006
	100	-0.282204	0.0657672	-1.22629	0.0243542	-0.867187
	101	-1.26968	2.63907	-0.651455	0.955117	-0.128321
	102	0.719915	-0.243319	-1.93894	0.578728	-0.238528
	103	1.74476	0.299765	-2.43033	0.89199	-0.201088
	104	0.647574	0.299765	0.632154	-0.0557472	0.319903
	105	1.14538	-0.152775	0.966261	-0.884826	0.931943
	106	-0.828215	1.34492	1.31428	-1.87659	-0.0681848
	107	0.0682101	-0.370897	0.345167	-1.26246	0.736291
	108	0.351282	0.172187	1.50472	-2.12457	1.5049
	Inner model correlation
		Attitude Toward Blended Learning (ABL)	Education Sustainability (ES)	Perceived Ease of Use (PEOU)	Perecived Usefulness (PU)	Student Satisfaction (SS)
	Attitude Toward Blended Learning (ABL)	1	0.0101833	-0.199893	-0.0623167	-0.128866
	Education Sustainability (ES)	0.0101833	1	-0.0462084	0.0224781	-0.0655297
	Perceived Ease of Use (PEOU)	-0.199893	-0.0462084	1	-0.0771459	0.40065
	Perecived Usefulness (PU)	-0.0623167	0.0224781	-0.0771459	1	-0.130651
	Student Satisfaction (SS)	-0.128866	-0.0655297	0.40065	-0.130651	1
	Inner model descriptives
		Mean	Median	Observed min	Observed max	Standard deviation	Excess kurtosis	Skewness	Number of observations used	Cramér-von Mises test statistic	Cramér-von Mises p value
	Attitude Toward Blended Learning (ABL)	-7.63915e-17	0.187282	-2.91563	1.82614	0.945511	1.09114	-0.845258	109	0.315207	0.000214936
	Education Sustainability (ES)	8.6577e-18	0.17016	-2.51687	2.63907	0.684593	3.08082	-0.0765956	109	0.62091	2.37017e-07
	Perceived Ease of Use (PEOU)	-6.31503e-17	0.3013	-2.5917	1.70611	0.942897	0.396123	-0.892507	109	0.39503	2.87511e-05
	Perecived Usefulness (PU)	1.42597e-16	0.183316	-3.75616	1.62974	0.98172	2.1816	-1.20255	109	0.27351	0.000656402
	Student Satisfaction (SS)	7.33358e-17	0.197381	-3.13585	2.07716	0.93647	1.24788	-0.94093	109	0.289568	0.000424742
	Conditional direct effects
	Matrix
	Conditional indirect effects
	Matrix
	Quality criteria
	R-square
	Overview
		R-square	R-square adjusted
	Attitude Toward Blended Learning (ABL)	0.10601	0.0804672
	Education Sustainability (ES)	0.531333	0.526953
	Perceived Ease of Use (PEOU)	0.110945	0.0855431
	Perecived Usefulness (PU)	0.0362256	0.00868917
	Student Satisfaction (SS)	0.123025	0.0979684
	f-square
	Matrix
		Attitude Toward Blended Learning (ABL)	Computer Self-Efficency (CSE)	Education Sustainability (ES)	Perceived Ease of Use (PEOU)	Perceived Enjoyment (PEN)	Perecived Usefulness (PU)	Student Satisfaction (SS)	Subjective Norm (SN)
	Attitude Toward Blended Learning (ABL)			1.13371
	Computer Self-Efficency (CSE)				0.000296049		0.018919	0.00296236
	Education Sustainability (ES)
	Perceived Ease of Use (PEOU)	0.0642865
	Perceived Enjoyment (PEN)				0.0702458		0.0339293	0.0374889
	Perecived Usefulness (PU)	0.0183443
	Student Satisfaction (SS)	0.00281343
	Subjective Norm (SN)				0.000833		0.00596981	0.0875523
	List
		f-square
	Attitude Toward Blended Learning (ABL) -> Education Sustainability (ES)	1.13371
	Computer Self-Efficency (CSE) -> Perceived Ease of Use (PEOU)	0.000296049
	Computer Self-Efficency (CSE) -> Perecived Usefulness (PU)	0.018919
	Computer Self-Efficency (CSE) -> Student Satisfaction (SS)	0.00296236
	Perceived Ease of Use (PEOU) -> Attitude Toward Blended Learning (ABL)	0.0642865
	Perceived Enjoyment (PEN) -> Perceived Ease of Use (PEOU)	0.0702458
	Perceived Enjoyment (PEN) -> Perecived Usefulness (PU)	0.0339293
	Perceived Enjoyment (PEN) -> Student Satisfaction (SS)	0.0374889
	Perecived Usefulness (PU) -> Attitude Toward Blended Learning (ABL)	0.0183443
	Student Satisfaction (SS) -> Attitude Toward Blended Learning (ABL)	0.00281343
	Subjective Norm (SN) -> Perceived Ease of Use (PEOU)	0.000833
	Subjective Norm (SN) -> Perecived Usefulness (PU)	0.00596981
	Subjective Norm (SN) -> Student Satisfaction (SS)	0.0875523
	Construct reliability and validity
	Overview
		Cronbach's alpha	Composite reliability (rho_a)	Composite reliability (rho_c)	Average variance extracted (AVE)
	Attitude Toward Blended Learning (ABL)	0.829406	0.849669	0.898023	0.74664
	Computer Self-Efficency (CSE)	0.799573	1.31177	0.777574	0.564702
	Education Sustainability (ES)	0.755092	0.763298	0.890524	0.802689
	Perceived Ease of Use (PEOU)	0.699837	0.758999	0.831989	0.626626
	Perceived Enjoyment (PEN)	0.784491	0.805209	0.853699	0.593517
	Perecived Usefulness (PU)	0.405883	0.376594	0.690761	0.435452
	Student Satisfaction (SS)	0.604304	0.616001	0.790489	0.558637
	Subjective Norm (SN)	0.82961	-2.97772	0.0557323	0.159211
	Discriminant validity
	Heterotrait-monotrait ratio (HTMT) - Matrix
		Attitude Toward Blended Learning (ABL)	Computer Self-Efficency (CSE)	Education Sustainability (ES)	Perceived Ease of Use (PEOU)	Perceived Enjoyment (PEN)	Perecived Usefulness (PU)	Student Satisfaction (SS)	Subjective Norm (SN)
	Attitude Toward Blended Learning (ABL)
	Computer Self-Efficency (CSE)	0.633621
	Education Sustainability (ES)	0.908096	0.574102
	Perceived Ease of Use (PEOU)	0.377502	0.176546	0.289102
	Perceived Enjoyment (PEN)	0.755941	0.910061	0.660403	0.392654
	Perecived Usefulness (PU)	0.247316	0.149562	0.173742	0.253056	0.190084
	Student Satisfaction (SS)	0.260789	0.174621	0.191811	0.680774	0.2966	0.347579
	Subjective Norm (SN)	0.661289	0.824276	0.58476	0.0829888	0.679458	0.162571	0.165025
	Heterotrait-monotrait ratio (HTMT) - List
		Heterotrait-monotrait ratio (HTMT)
	Computer Self-Efficency (CSE) <-> Attitude Toward Blended Learning (ABL)	0.633621
	Education Sustainability (ES) <-> Attitude Toward Blended Learning (ABL)	0.908096
	Education Sustainability (ES) <-> Computer Self-Efficency (CSE)	0.574102
	Perceived Ease of Use (PEOU) <-> Attitude Toward Blended Learning (ABL)	0.377502
	Perceived Ease of Use (PEOU) <-> Computer Self-Efficency (CSE)	0.176546
	Perceived Ease of Use (PEOU) <-> Education Sustainability (ES)	0.289102
	Perceived Enjoyment (PEN) <-> Attitude Toward Blended Learning (ABL)	0.755941
	Perceived Enjoyment (PEN) <-> Computer Self-Efficency (CSE)	0.910061
	Perceived Enjoyment (PEN) <-> Education Sustainability (ES)	0.660403
	Perceived Enjoyment (PEN) <-> Perceived Ease of Use (PEOU)	0.392654
	Perecived Usefulness (PU) <-> Attitude Toward Blended Learning (ABL)	0.247316
	Perecived Usefulness (PU) <-> Computer Self-Efficency (CSE)	0.149562
	Perecived Usefulness (PU) <-> Education Sustainability (ES)	0.173742
	Perecived Usefulness (PU) <-> Perceived Ease of Use (PEOU)	0.253056
	Perecived Usefulness (PU) <-> Perceived Enjoyment (PEN)	0.190084
	Student Satisfaction (SS) <-> Attitude Toward Blended Learning (ABL)	0.260789
	Student Satisfaction (SS) <-> Computer Self-Efficency (CSE)	0.174621
	Student Satisfaction (SS) <-> Education Sustainability (ES)	0.191811
	Student Satisfaction (SS) <-> Perceived Ease of Use (PEOU)	0.680774
	Student Satisfaction (SS) <-> Perceived Enjoyment (PEN)	0.2966
	Student Satisfaction (SS) <-> Perecived Usefulness (PU)	0.347579
	Subjective Norm (SN) <-> Attitude Toward Blended Learning (ABL)	0.661289
	Subjective Norm (SN) <-> Computer Self-Efficency (CSE)	0.824276
	Subjective Norm (SN) <-> Education Sustainability (ES)	0.58476
	Subjective Norm (SN) <-> Perceived Ease of Use (PEOU)	0.0829888
	Subjective Norm (SN) <-> Perceived Enjoyment (PEN)	0.679458
	Subjective Norm (SN) <-> Perecived Usefulness (PU)	0.162571
	Subjective Norm (SN) <-> Student Satisfaction (SS)	0.165025
	Fornell-Larcker criterion
		Attitude Toward Blended Learning (ABL)	Computer Self-Efficency (CSE)	Education Sustainability (ES)	Perceived Ease of Use (PEOU)	Perceived Enjoyment (PEN)	Perecived Usefulness (PU)	Student Satisfaction (SS)	Subjective Norm (SN)
	Attitude Toward Blended Learning (ABL)	0.864083
	Computer Self-Efficency (CSE)	0.488529	0.751467
	Education Sustainability (ES)	0.728926	0.375723	0.895929
	Perceived Ease of Use (PEOU)	0.293492	0.220175	0.207696	0.791597
	Perceived Enjoyment (PEN)	0.624418	0.688632	0.522266	0.331773	0.7704
	Perecived Usefulness (PU)	-0.139599	-0.00422238	-0.0713128	-0.0269192	0.123632	0.659888
	Student Satisfaction (SS)	0.180111	0.147879	0.112927	0.432661	0.215043	-0.0724746	0.747421
	Subjective Norm (SN)	-0.0493604	-0.164533	-0.0650362	-0.0400675	-0.0465143	-0.0577229	-0.282074	0.399012
	Cross loadings
		Attitude Toward Blended Learning (ABL)	Computer Self-Efficency (CSE)	Education Sustainability (ES)	Perceived Ease of Use (PEOU)	Perceived Enjoyment (PEN)	Perecived Usefulness (PU)	Student Satisfaction (SS)	Subjective Norm (SN)
	ABL1	0.786043	0.469339	0.514206	0.284901	0.536466	-0.0648044	0.239056	-0.152437
	ABL2	0.89507	0.435455	0.631333	0.224418	0.536928	-0.134693	0.0410888	0.0365954
	ABL3	0.906038	0.379804	0.722962	0.25801	0.550241	-0.151983	0.193174	-0.0286052
	CSE1	0.399634	0.40554	0.414756	-0.0778652	0.49143	-0.0244722	0.0645609	-0.246411
	CSE2	0.392856	0.740491	0.335169	0.0356112	0.631853	0.0321354	0.0740942	-0.287022
	CSE3	0.496429	0.990615	0.384329	0.233224	0.672961	-0.0153113	0.155827	-0.139671
	ES1	0.610266	0.324814	0.882077	0.11965	0.472512	0.0250322	0.150075	-0.098128
	ES2	0.691856	0.34757	0.909571	0.244973	0.464599	-0.14243	0.0582014	-0.0232009
	PEOU1	0.304126	0.223431	0.172721	0.883458	0.309441	-0.0238705	0.428922	-0.0732654
	PEOU2	0.199062	0.144538	0.129168	0.82642	0.265021	-0.0200865	0.240828	-0.00538277
	PEOU3	0.169639	0.141311	0.206323	0.645297	0.198373	-0.0199796	0.349846	0.00230684
	PN1	0.475456	0.614113	0.375114	0.151267	0.764397	-0.03818	0.0966714	0.128951
	PN2	0.482397	0.544266	0.40258	0.25858	0.750998	0.102103	0.175142	-0.0575296
	PN3	0.440336	0.644893	0.389949	0.181286	0.809295	0.0631315	0.129712	-0.100564
	PN4	0.497928	0.416682	0.413818	0.330881	0.755518	0.157492	0.202279	-0.045526
	PU1	-0.0734937	0.0144278	0.0030248	0.0862071	0.112168	0.718014	-0.0204957	-0.132628
	PU2	-0.128899	-0.059606	-0.0338802	-0.0618776	0.0040304	0.475637	-0.157114	0.169878
	PU3	-0.108812	0.00164669	-0.117248	-0.122527	0.0895037	0.751387	-0.0375815	-0.0230711
	SN1	0.512055	0.510627	0.398223	0.0264624	0.524923	0.027941	-0.0918162	0.216999
	SN2	0.455818	0.430517	0.414789	-0.0037718	0.432338	0.00513905	-0.0616124	0.0513073
	SN3	0.446964	0.526714	0.389805	0.0424939	0.442565	0.0600956	0.153	-0.654149
	SS1	0.129015	0.0669417	0.111158	0.413283	0.16378	-0.133105	0.664854	-0.134339
	SS2	0.167814	0.0801285	0.0775428	0.272334	0.123928	-0.0843468	0.807445	-0.230919
	SS3	0.109122	0.173963	0.0714877	0.306961	0.195198	0.0340553	0.762833	-0.252836
	Collinearity statistics (VIF)
	Outer model - List
		VIF
	ABL1	1.54173
	ABL2	2.44831
	ABL3	2.39724
	CSE1	1.78031
	CSE2	2.63938
	CSE3	1.7655
	ES1	1.58202
	ES2	1.58202
	PEOU1	1.64014
	PEOU2	1.61191
	PEOU3	1.1879
	PN1	1.88794
	PN2	1.86382
	PN3	1.98122
	PN4	1.34172
	PU1	1.02838
	PU2	1.26838
	PU3	1.29033
	SN1	1.89531
	SN2	2.22768
	SN3	1.76885
	SS1	1.18206
	SS2	1.33945
	SS3	1.20143
	Inner model - Matrix
		Attitude Toward Blended Learning (ABL)	Computer Self-Efficency (CSE)	Education Sustainability (ES)	Perceived Ease of Use (PEOU)	Perceived Enjoyment (PEN)	Perecived Usefulness (PU)	Student Satisfaction (SS)	Subjective Norm (SN)
	Attitude Toward Blended Learning (ABL)			1
	Computer Self-Efficency (CSE)				1.96776		1.96776	1.96776
	Education Sustainability (ES)
	Perceived Ease of Use (PEOU)	1.23034
	Perceived Enjoyment (PEN)				1.91864		1.91864	1.91864
	Perecived Usefulness (PU)	1.0053
	Student Satisfaction (SS)	1.23594
	Subjective Norm (SN)				1.03687		1.03687	1.03687
	Inner model - List
		VIF
	Attitude Toward Blended Learning (ABL) -> Education Sustainability (ES)	1
	Computer Self-Efficency (CSE) -> Perceived Ease of Use (PEOU)	1.96776
	Computer Self-Efficency (CSE) -> Perecived Usefulness (PU)	1.96776
	Computer Self-Efficency (CSE) -> Student Satisfaction (SS)	1.96776
	Perceived Ease of Use (PEOU) -> Attitude Toward Blended Learning (ABL)	1.23034
	Perceived Enjoyment (PEN) -> Perceived Ease of Use (PEOU)	1.91864
	Perceived Enjoyment (PEN) -> Perecived Usefulness (PU)	1.91864
	Perceived Enjoyment (PEN) -> Student Satisfaction (SS)	1.91864
	Perecived Usefulness (PU) -> Attitude Toward Blended Learning (ABL)	1.0053
	Student Satisfaction (SS) -> Attitude Toward Blended Learning (ABL)	1.23594
	Subjective Norm (SN) -> Perceived Ease of Use (PEOU)	1.03687
	Subjective Norm (SN) -> Perecived Usefulness (PU)	1.03687
	Subjective Norm (SN) -> Student Satisfaction (SS)	1.03687
	Model fit
	Fit summary
		Saturated model	Estimated model
	SRMR	0.1801	0.215359
	d_ULS	9.73082	13.9138
	d_G	1.51557	1.64077
	Chi-square	819.985	873.938
	NFI	0.415656	0.377207
	Model selection criteria
	Matrix
		BIC (Bayesian information criterion)
	Attitude Toward Blended Learning (ABL)	5.54618
	Education Sustainability (ES)	-74.2289
	Perceived Ease of Use (PEOU)	4.94283
	Perecived Usefulness (PU)	13.7389
	Student Satisfaction (SS)	3.45163
	Algorithm
	Setting
	Data file
		Setting
	Data file	Survey-data
	Weighting vector	-
	PLS-SEM algorithm
		Setting
	Initial weights	1.0
	Max. number of iterations	3000
	Stop criterion	10⁻⁷
	Type of results	Standardized
	Use Lohmoeller settings?	No
	Vary copula by binary categories	yes
	Weighting scheme	Path
	Construct outer weighting mode
		Setting
	Attitude Toward Blended Learning (ABL)	AUTOMATIC
	Computer Self-Efficency (CSE)	AUTOMATIC
	Education Sustainability (ES)	AUTOMATIC
	Perceived Ease of Use (PEOU)	AUTOMATIC
	Perceived Enjoyment (PEN)	AUTOMATIC
	Perecived Usefulness (PU)	AUTOMATIC
	Student Satisfaction (SS)	AUTOMATIC
	Subjective Norm (SN)	AUTOMATIC
	Stop criterion changes
	Matrix
		ABL1	ABL2	ABL3	CSE1	CSE2	CSE3	ES1	ES2	PEOU1	PEOU2	PEOU3	PN1	PN2	PN3	PN4	PU1	PU2	PU3	SN1	SN2	SN3	SS1	SS2	SS3
	Iteration 1	0.386032	0.386032	0.386032	0.394526	0.394526	0.394526	0.557877	0.557877	0.42168	0.42168	0.42168	0.320793	0.320793	0.320793	0.320793	0.493089	0.493089	0.493089	0.385974	0.385974	0.385974	0.446143	0.446143	0.446143
	Iteration 2	0.335308	0.377813	0.439564	0.049393	0.238729	0.801512	0.520403	0.594745	0.51345	0.418692	0.310345	0.200092	0.377242	0.262884	0.464395	0.505265	0.581919	0.399083	0.583926	0.190995	0.375327	0.512649	0.373179	0.456505
	Iteration 3	0.33372	0.379786	0.438994	-0.0910221	0.220836	0.881658	0.522641	0.592576	0.526877	0.41328	0.298864	0.206057	0.372489	0.259457	0.466722	0.50107	0.479827	0.499291	0.958064	0.265476	-0.300398	0.46555	0.392195	0.484412
	Iteration 4	0.332824	0.379828	0.439731	-0.107166	0.217599	0.890517	0.522611	0.592606	0.5312	0.409744	0.297468	0.200132	0.3712	0.260062	0.473461	0.493527	0.446497	0.533281	0.792228	0.522637	-1.14049	0.422801	0.415455	0.500813
	Iteration 5	0.33269	0.379664	0.440009	-0.100072	0.22036	0.885664	0.522641	0.592577	0.533504	0.398599	0.308758	0.195022	0.371165	0.260884	0.477832	0.528461	0.403663	0.543373	0.714576	0.516718	-1.22422	0.385066	0.450504	0.498317
	Iteration 6	0.332671	0.37948	0.440208	-0.0885592	0.221052	0.880491	0.522653	0.592565	0.531192	0.399265	0.311092	0.189016	0.373563	0.262389	0.479948	0.558058	0.369576	0.547331	0.690145	0.495737	-1.24837	0.380158	0.456772	0.496047
	Iteration 7	0.332596	0.379492	0.440262	-0.0867143	0.22067	0.88002	0.522662	0.592556	0.529577	0.400327	0.311949	0.187154	0.374511	0.263124	0.48011	0.581624	0.342686	0.548451	0.676901	0.489278	-1.25769	0.378342	0.459691	0.494564
	Iteration 8	0.332531	0.379515	0.440295	-0.0868074	0.220337	0.880307	0.522664	0.592554	0.529048	0.400564	0.312371	0.18605	0.375176	0.263707	0.479945	0.598433	0.320953	0.550052	0.666177	0.484259	-1.26442	0.377643	0.460824	0.49398
	Iteration 9	0.332467	0.379541	0.440324	-0.0872577	0.22024	0.880565	0.522665	0.592553	0.528701	0.400656	0.31273	0.185402	0.375608	0.264124	0.479727	0.610908	0.303839	0.551291	0.657018	0.480068	-1.26964	0.377121	0.461678	0.493535
	Iteration 10	0.332421	0.379559	0.440347	-0.0876238	0.220243	0.880712	0.522667	0.592552	0.528433	0.400714	0.313023	0.184943	0.375933	0.264445	0.479525	0.620287	0.290455	0.552193	0.649323	0.476272	-1.27374	0.376735	0.462362	0.49315
	Iteration 11	0.332387	0.379572	0.440364	-0.0878918	0.220292	0.880785	0.522667	0.592551	0.528208	0.400767	0.313264	0.184609	0.376181	0.264695	0.47935	0.627407	0.280019	0.552828	0.642992	0.472978	-1.27692	0.376436	0.462931	0.49281
	Iteration 12	0.332363	0.37958	0.440376	-0.0880836	0.220357	0.880816	0.522668	0.59255	0.528022	0.400814	0.313457	0.18436	0.376373	0.264888	0.479204	0.63284	0.271892	0.553281	0.637861	0.470198	-1.27937	0.376206	0.463395	0.49252
	Iteration 13	0.332345	0.379586	0.440385	-0.0882225	0.220422	0.880824	0.522669	0.59255	0.527871	0.400855	0.313612	0.184173	0.376521	0.265039	0.479084	0.636999	0.26557	0.553608	0.633748	0.467905	-1.28124	0.376031	0.463768	0.492279
	Iteration 14	0.332333	0.37959	0.440392	-0.0883244	0.220482	0.880821	0.522669	0.59255	0.52775	0.40089	0.313733	0.184032	0.376636	0.265156	0.478988	0.64019	0.260657	0.553849	0.630479	0.466044	-1.28268	0.375896	0.464065	0.492082
	Iteration 15	0.332323	0.379593	0.440398	-0.0884	0.220533	0.880814	0.522669	0.592549	0.527654	0.400918	0.313828	0.183925	0.376725	0.265247	0.478911	0.642644	0.256842	0.554027	0.627897	0.464552	-1.28378	0.375794	0.4643	0.491923
	Iteration 16	0.332316	0.379595	0.440402	-0.0884567	0.220577	0.880804	0.522669	0.592549	0.527578	0.400941	0.313903	0.183843	0.376794	0.265317	0.47885	0.644533	0.253881	0.554161	0.625867	0.463364	-1.28462	0.375715	0.464485	0.491796
	Iteration 17	0.332311	0.379597	0.440405	-0.0884995	0.220613	0.880795	0.52267	0.592549	0.527519	0.40096	0.313961	0.183781	0.376847	0.265372	0.478802	0.645988	0.251586	0.554262	0.624277	0.462427	-1.28527	0.375654	0.464629	0.491696
	Iteration 18	0.332307	0.379598	0.440407	-0.0885319	0.220642	0.880787	0.52267	0.592549	0.527472	0.400974	0.314006	0.183733	0.376888	0.265414	0.478764	0.64711	0.249807	0.554338	0.623035	0.461689	-1.28577	0.375608	0.464742	0.491617
	Iteration 19	0.332304	0.379599	0.440409	-0.0885567	0.220665	0.88078	0.52267	0.592549	0.527436	0.400985	0.314041	0.183696	0.37692	0.265446	0.478735	0.647976	0.248429	0.554397	0.622068	0.461112	-1.28615	0.375572	0.46483	0.491555
	Iteration 20	0.332301	0.3796	0.44041	-0.0885756	0.220683	0.880774	0.52267	0.592549	0.527408	0.400994	0.314069	0.183668	0.376945	0.265472	0.478712	0.648645	0.247362	0.554442	0.621315	0.460661	-1.28645	0.375545	0.464899	0.491506
	Iteration 21	0.3323	0.3796	0.440412	-0.0885901	0.220697	0.880769	0.52267	0.592549	0.527386	0.401001	0.31409	0.183646	0.376964	0.265491	0.478694	0.649161	0.246536	0.554476	0.620731	0.46031	-1.28668	0.375524	0.464952	0.491468
	Iteration 22	0.332298	0.3796	0.440412	-0.0886012	0.220709	0.880765	0.52267	0.592549	0.527369	0.401007	0.314106	0.183629	0.376978	0.265506	0.47868	0.64956	0.245897	0.554502	0.620277	0.460037	-1.28685	0.375507	0.464993	0.491439
	Iteration 23	0.332297	0.379601	0.440413	-0.0886098	0.220717	0.880762	0.52267	0.592549	0.527355	0.401011	0.314119	0.183616	0.37699	0.265518	0.47867	0.649868	0.245403	0.554523	0.619926	0.459825	-1.28699	0.375495	0.465025	0.491416
	Iteration 24	0.332296	0.379601	0.440414	-0.0886164	0.220724	0.880759	0.52267	0.592549	0.527345	0.401014	0.314128	0.183606	0.376999	0.265527	0.478661	0.650106	0.245021	0.554538	0.619653	0.45966	-1.28709	0.375485	0.46505	0.491398
	Iteration 25	0.332296	0.379601	0.440414	-0.0886215	0.22073	0.880758	0.52267	0.592549	0.527337	0.401017	0.314136	0.183599	0.377005	0.265534	0.478655	0.65029	0.244725	0.55455	0.619442	0.459533	-1.28717	0.375478	0.465069	0.491385
	Iteration 26	0.332295	0.379601	0.440414	-0.0886254	0.220734	0.880756	0.52267	0.592549	0.527331	0.401019	0.314142	0.183593	0.377011	0.265539	0.47865	0.650432	0.244496	0.55456	0.619279	0.459434	-1.28724	0.375472	0.465084	0.491374
	Iteration 27	0.332295	0.379601	0.440414	-0.0886284	0.220737	0.880755	0.52267	0.592549	0.527326	0.401021	0.314147	0.183588	0.377015	0.265544	0.478646	0.650542	0.244319	0.554567	0.619152	0.459357	-1.28728	0.375467	0.465096	0.491366
	Iteration 28	0.332294	0.379601	0.440415	-0.0886307	0.22074	0.880754	0.52267	0.592549	0.527323	0.401022	0.31415	0.183585	0.377018	0.265547	0.478643	0.650627	0.244182	0.554572	0.619054	0.459298	-1.28732	0.375464	0.465105	0.491359
	Iteration 29	0.332294	0.379601	0.440415	-0.0886325	0.220741	0.880753	0.52267	0.592549	0.52732	0.401023	0.314153	0.183582	0.37702	0.265549	0.47864	0.650693	0.244076	0.554577	0.618979	0.459252	-1.28735	0.375461	0.465111	0.491354
	Iteration 30	0.332294	0.379601	0.440415	-0.0886339	0.220743	0.880753	0.52267	0.592549	0.527317	0.401023	0.314155	0.18358	0.377022	0.265551	0.478639	0.650744	0.243994	0.55458	0.61892	0.459217	-1.28737	0.375459	0.465117	0.49135
	Iteration 31	0.332294	0.379601	0.440415	-0.088635	0.220744	0.880752	0.52267	0.592549	0.527316	0.401024	0.314156	0.183578	0.377024	0.265553	0.478637	0.650783	0.243931	0.554582	0.618875	0.459189	-1.28739	0.375458	0.465121	0.491347
	Iteration 32	0.332294	0.379602	0.440415	-0.0886358	0.220745	0.880752	0.52267	0.592549	0.527314	0.401024	0.314158	0.183577	0.377025	0.265554	0.478636	0.650813	0.243882	0.554584	0.61884	0.459168	-1.2874	0.375456	0.465124	0.491345
	Iteration 33	0.332294	0.379602	0.440415	-0.0886365	0.220746	0.880752	0.52267	0.592549	0.527313	0.401025	0.314159	0.183576	0.377026	0.265555	0.478635	0.650837	0.243844	0.554586	0.618813	0.459151	-1.28741	0.375455	0.465127	0.491343
	Iteration 34	0.332294	0.379602	0.440415	-0.088637	0.220746	0.880751	0.52267	0.592549	0.527313	0.401025	0.314159	0.183575	0.377026	0.265555	0.478635	0.650855	0.243815	0.554587	0.618792	0.459139	-1.28742	0.375455	0.465128	0.491342
	Iteration 35	0.332294	0.379602	0.440415	-0.0886374	0.220747	0.880751	0.52267	0.592548	0.527312	0.401025	0.31416	0.183575	0.377027	0.265556	0.478634	0.650869	0.243793	0.554588	0.618776	0.459129	-1.28743	0.375454	0.46513	0.491341
	Iteration 36	0.332294	0.379602	0.440415	-0.0886377	0.220747	0.880751	0.52267	0.592548	0.527312	0.401025	0.31416	0.183574	0.377027	0.265556	0.478634	0.65088	0.243775	0.554589	0.618763	0.459121	-1.28743	0.375454	0.465131	0.49134
	Iteration 37	0.332294	0.379602	0.440415	-0.0886379	0.220747	0.880751	0.52267	0.592548	0.527311	0.401025	0.314161	0.183574	0.377027	0.265557	0.478634	0.650888	0.243762	0.554589	0.618754	0.459115	-1.28744	0.375453	0.465132	0.491339
	Iteration 38	0.332294	0.379602	0.440415	-0.0886381	0.220747	0.880751	0.52267	0.592548	0.527311	0.401026	0.314161	0.183574	0.377028	0.265557	0.478633	0.650895	0.243751	0.55459	0.618746	0.459111	-1.28744	0.375453	0.465133	0.491339
	Iteration 39	0.332294	0.379602	0.440415	-0.0886382	0.220748	0.880751	0.52267	0.592548	0.527311	0.401026	0.314161	0.183573	0.377028	0.265557	0.478633	0.6509	0.243743	0.55459	0.61874	0.459107	-1.28744	0.375453	0.465133	0.491339
	Iteration 40	0.332294	0.379602	0.440415	-0.0886383	0.220748	0.880751	0.52267	0.592548	0.527311	0.401026	0.314161	0.183573	0.377028	0.265557	0.478633	0.650904	0.243737	0.55459	0.618736	0.459105	-1.28744	0.375453	0.465134	0.491338
	Iteration 41	0.332294	0.379602	0.440415	-0.0886384	0.220748	0.880751	0.52267	0.592548	0.52731	0.401026	0.314162	0.183573	0.377028	0.265557	0.478633	0.650907	0.243732	0.55459	0.618732	0.459103	-1.28744	0.375453	0.465134	0.491338
	Iteration 42	0.332294	0.379602	0.440415	-0.0886385	0.220748	0.880751	0.52267	0.592548	0.52731	0.401026	0.314162	0.183573	0.377028	0.265557	0.478633	0.650909	0.243728	0.554591	0.61873	0.459101	-1.28744	0.375452	0.465134	0.491338
	Iteration 43	0.332294	0.379602	0.440415	-0.0886385	0.220748	0.880751	0.52267	0.592548	0.52731	0.401026	0.314162	0.183573	0.377028	0.265558	0.478633	0.650911	0.243725	0.554591	0.618728	0.4591	-1.28745	0.375452	0.465134	0.491338
	Iteration 44	0.332294	0.379602	0.440415	-0.0886386	0.220748	0.880751	0.52267	0.592548	0.52731	0.401026	0.314162	0.183573	0.377028	0.265558	0.478633	0.650912	0.243723	0.554591	0.618726	0.459099	-1.28745	0.375452	0.465134	0.491338
	Iteration 45	0.332294	0.379602	0.440415	-0.0886386	0.220748	0.880751	0.52267	0.592548	0.52731	0.401026	0.314162	0.183573	0.377028	0.265558	0.478633	0.650913	0.243721	0.554591	0.618725	0.459098	-1.28745	0.375452	0.465135	0.491338
	Iteration 46	0.332294	0.379602	0.440415	-0.0886386	0.220748	0.880751	0.52267	0.592548	0.52731	0.401026	0.314162	0.183573	0.377028	0.265558	0.478633	0.650914	0.24372	0.554591	0.618724	0.459097	-1.28745	0.375452	0.465135	0.491338
	Iteration 47	0.332294	0.379602	0.440415	-0.0886386	0.220748	0.880751	0.52267	0.592548	0.52731	0.401026	0.314162	0.183573	0.377028	0.265558	0.478633	0.650915	0.243719	0.554591	0.618723	0.459097	-1.28745	0.375452	0.465135	0.491337
	Iteration 48	0.332294	0.379602	0.440415	-0.0886386	0.220748	0.880751	0.52267	0.592548	0.52731	0.401026	0.314162	0.183573	0.377028	0.265558	0.478633	0.650915	0.243718	0.554591	0.618722	0.459097	-1.28745	0.375452	0.465135	0.491337
	Iteration 49	0.332294	0.379602	0.440415	-0.0886386	0.220748	0.880751	0.52267	0.592548	0.52731	0.401026	0.314162	0.183573	0.377028	0.265558	0.478633	0.650916	0.243718	0.554591	0.618722	0.459096	-1.28745	0.375452	0.465135	0.491337
	Iteration 50	0.332294	0.379602	0.440415	-0.0886387	0.220748	0.880751	0.52267	0.592548	0.52731	0.401026	0.314162	0.183573	0.377028	0.265558	0.478633	0.650916	0.243717	0.554591	0.618722	0.459096	-1.28745	0.375452	0.465135	0.491337
	Iteration 51	0.332294	0.379602	0.440415	-0.0886387	0.220748	0.880751	0.52267	0.592548	0.52731	0.401026	0.314162	0.183573	0.377028	0.265558	0.478633	0.650916	0.243717	0.554591	0.618721	0.459096	-1.28745	0.375452	0.465135	0.491337
	Iteration 52	0.332294	0.379602	0.440415	-0.0886387	0.220748	0.880751	0.52267	0.592548	0.52731	0.401026	0.314162	0.183573	0.377028	0.265558	0.478633	0.650916	0.243717	0.554591	0.618721	0.459096	-1.28745	0.375452	0.465135	0.491337
	Iteration 53	0.332294	0.379602	0.440415	-0.0886387	0.220748	0.880751	0.52267	0.592548	0.52731	0.401026	0.314162	0.183573	0.377028	0.265558	0.478633	0.650916	0.243716	0.554591	0.618721	0.459096	-1.28745	0.375452	0.465135	0.491337
	Iteration 54	0.332294	0.379602	0.440415	-0.0886387	0.220748	0.880751	0.52267	0.592548	0.52731	0.401026	0.314162	0.183573	0.377028	0.265558	0.478633	0.650917	0.243716	0.554591	0.618721	0.459096	-1.28745	0.375452	0.465135	0.491337
	Iteration 55	0.332294	0.379602	0.440415	-0.0886387	0.220748	0.880751	0.52267	0.592548	0.52731	0.401026	0.314162	0.183573	0.377028	0.265558	0.478633	0.650917	0.243716	0.554591	0.618721	0.459096	-1.28745	0.375452	0.465135	0.491337
	Iteration 56	0.332294	0.379602	0.440415	-0.0886387	0.220748	0.880751	0.52267	0.592548	0.52731	0.401026	0.314162	0.183573	0.377028	0.265558	0.478633	0.650917	0.243716	0.554591	0.618721	0.459096	-1.28745	0.375452	0.465135	0.491337
	Iteration 57	0.332294	0.379602	0.440415	-0.0886387	0.220748	0.880751	0.52267	0.592548	0.52731	0.401026	0.314162	0.183573	0.377028	0.265558	0.478633	0.650917	0.243716	0.554591	0.618721	0.459095	-1.28745	0.375452	0.465135	0.491337
	Posthoc minimum sample size
	List
		Path coefficients	Alpha 1%, power 80%	Alpha 5%, power 80%	Alpha 1%, power 90%	Alpha 5%, power 90%
	Attitude Toward Blended Learning (ABL) -> Education Sustainability (ES)	0.728926	19	12	25	17
	Computer Self-Efficency (CSE) -> Perceived Ease of Use (PEOU)	-0.0227579	19378	11938	25133	16535
	Computer Self-Efficency (CSE) -> Perecived Usefulness (PU)	-0.189419	280	173	363	239
	Computer Self-Efficency (CSE) -> Student Satisfaction (SS)	-0.0714988	1964	1210	2547	1676
	Perceived Ease of Use (PEOU) -> Attitude Toward Blended Learning (ABL)	0.265912	142	88	185	122
	Perceived Enjoyment (PEN) -> Perceived Ease of Use (PEOU)	0.346156	84	52	109	72
	Perceived Enjoyment (PEN) -> Perecived Usefulness (PU)	0.25048	160	99	208	137
	Perceived Enjoyment (PEN) -> Student Satisfaction (SS)	0.251155	160	99	207	136
	Perecived Usefulness (PU) -> Attitude Toward Blended Learning (ABL)	-0.1284	609	376	790	520
	Student Satisfaction (SS) -> Attitude Toward Blended Learning (ABL)	0.0557549	3229	1989	4188	2755
	Subjective Norm (SN) -> Perceived Ease of Use (PEOU)	-0.0277107	13070	8052	16952	11153
	Subjective Norm (SN) -> Perecived Usefulness (PU)	-0.0772377	1683	1037	2182	1436
	Subjective Norm (SN) -> Student Satisfaction (SS)	-0.282156	127	78	164	108
	Execution log
	Reading score matrix of complete data set
	Calculating full data set.
	Running PLS-SEM iterations, at most 3000.
	All calculations done.
	Model and data
	Inner model
		Attitude Toward Blended Learning (ABL)	Computer Self-Efficency (CSE)	Education Sustainability (ES)	Perceived Ease of Use (PEOU)	Perceived Enjoyment (PEN)	Perecived Usefulness (PU)	Student Satisfaction (SS)	Subjective Norm (SN)
	Attitude Toward Blended Learning (ABL)			1
	Computer Self-Efficency (CSE)				1		1	1
	Education Sustainability (ES)
	Perceived Ease of Use (PEOU)	1
	Perceived Enjoyment (PEN)				1		1	1
	Perecived Usefulness (PU)	1
	Student Satisfaction (SS)	1
	Subjective Norm (SN)				1		1	1
	Outer model
		Attitude Toward Blended Learning (ABL)	Computer Self-Efficency (CSE)	Education Sustainability (ES)	Perceived Ease of Use (PEOU)	Perceived Enjoyment (PEN)	Perecived Usefulness (PU)	Student Satisfaction (SS)	Subjective Norm (SN)
	ABL1	-1
	ABL2	-1
	ABL3	-1
	CSE1		-1
	CSE2		-1
	CSE3		-1
	ES1			-1
	ES2			-1
	PEOU1				-1
	PEOU2				-1
	PEOU3				-1
	PN1					-1
	PN2					-1
	PN3					-1
	PN4					-1
	PU1						-1
	PU2						-1
	PU3						-1
	SN1								-1
	SN2								-1
	SN3								-1
	SS1							-1
	SS2							-1
	SS3							-1
	Indicator data (original)
	Matrix
	Case index	ABL1	ABL2	ABL3	CSE1	CSE2	CSE3	ES1	ES2	PEOU1	PEOU2	PEOU3	PN1	PN2	PN3	PN4	PU1	PU2	PU3	SN1	SN2	SN3	SS1	SS2	SS3
	0	5	5	5	5	5	5	5	5	4	4	4	5	5	5	5	5	3	5	5	5	5	4	4	4
	1	1	3	5	4	4	3	5	5	3	3	4	2	5	4	2	5	4	5	4	3	5	1	4	4
	2	5	4	3	3	4	3	5	4	4	4	4	3	3	3	5	5	3	5	3	4	3	4	3	4
	3	3	3	3	4	4	4	3	3	3	3	3	4	4	4	3	5	3	4	1	3	5	4	3	4
	4	4	4	3	3	3	3	4	4	2	3	2	3	3	3	3	5	4	4	4	4	4	2	3	4
	5	1	1	3	3	3	3	3	4	4	1	5	3	3	4	2	5	4	4	3	1	1	5	3	4
	6	3	3	3	3	4	3	3	3	3	3	3	5	4	4	3	4	4	5	3	4	3	3	3	4
	7	4	4	4	4	3	4	4	4	4	2	2	4	4	4	4	4	4	5	4	3	4	4	3	4
	8	3	4	2	1	2	4	2	1	3	3	3	4	3	4	4	4	4	5	4	4	4	3	2	4
	9	5	4	4	4	4	4	4	4	4	4	4	4	4	4	4	4	4	5	3	4	4	4	4	2
	10	3	4	1	4	4	3	3	3	1	1	1	3	3	4	1	4	4	5	4	3	4	1	1	2
	11	4	4	4	4	4	4	4	4	2	2	2	4	4	4	4	3	4	5	4	4	4	1	5	2
	12	2	2	3	3	2	2	3	2	3	5	4	3	3	3	4	3	4	4	1	2	2	4	4	4
	13	2	4	3	2	2	2	2	2	4	4	3	2	3	2	2	3	4	4	3	2	2	3	3	3
	14	1	4	2	5	4	1	3	3	1	1	3	4	1	5	5	3	4	4	2	3	1	3	3	3
	15	3	3	3	3	3	3	3	3	4	3	3	3	3	3	3	3	4	4	4	4	4	4	3	5
	16	4	2	4	1	1	5	5	4	3	4	4	4	2	2	4	3	4	4	2	3	1	3	4	4
	17	3	3	3	3	3	3	3	3	4	4	1	3	3	3	3	2	4	4	3	3	3	2	4	4
	18	4	4	3	3	4	4	3	4	4	4	4	4	4	4	4	4	2	3	3	3	4	4	4	4
	19	1	1	1	1	1	1	1	1	3	4	4	1	1	1	1	1	2	4	1	1	1	4	3	3
	20	1	1	1	1	1	1	1	1	4	4	4	2	2	2	1	5	2	3	1	1	1	4	4	4
	21	4	4	3	4	4	4	4	4	2	2	3	3	3	3	4	5	3	4	3	4	4	2	2	3
	22	4	4	4	4	4	4	3	3	2	2	2	4	4	4	4	5	3	5	4	4	4	2	2	2
	23	2	2	2	2	2	2	2	2	3	1	5	2	2	2	2	5	4	5	2	2	2	4	1	4
	24	5	5	5	5	5	5	5	5	4	4	3	5	5	5	5	5	4	5	4	3	3	3	3	3
	25	2	1	2	3	2	2	1	1	3	1	1	2	4	3	3	5	4	5	2	2	1	1	5	4
	26	4	4	4	4	4	4	4	4	5	3	5	4	4	4	4	2	4	5	4	4	4	4	4	4
	27	4	4	4	4	4	4	4	4	5	3	4	4	4	4	4	3	4	2	4	4	4	3	3	3
	28	4	4	4	4	4	3	4	4	5	4	4	4	4	4	4	3	4	2	4	4	4	2	3	2
	29	3	4	4	4	4	4	5	3	5	4	4	4	5	4	3	5	1	3	4	4	4	4	1	5
	30	4	4	3	4	4	4	3	3	4	4	5	4	4	4	3	5	1	4	4	3	4	3	3	3
	31	4	4	4	4	4	4	4	4	4	4	5	4	4	4	4	5	3	1	4	3	4	4	2	2
	32	3	3	3	3	3	3	3	3	4	4	5	3	3	3	3	5	3	4	3	3	3	3	3	3
	33	4	3	4	1	1	3	4	4	4	4	5	4	3	4	4	5	4	4	4	2	2	4	4	4
	34	4	4	4	4	4	4	4	4	4	4	5	4	4	4	4	5	4	4	4	4	4	1	1	1
	35	4	3	2	4	4	3	3	4	3	4	5	3	4	4	3	5	4	4	4	4	3	2	2	2
	36	3	3	3	3	3	3	3	3	3	4	4	3	3	3	3	5	4	4	3	3	3	3	5	4
	37	4	1	1	3	3	5	1	1	3	4	4	1	3	4	1	5	4	4	1	1	2	4	4	3
	38	4	4	4	4	4	4	4	4	3	4	4	4	4	4	4	3	4	5	4	4	4	1	1	3
	39	4	2	1	4	5	4	2	3	3	4	4	3	4	5	5	3	5	5	4	3	4	4	3	3
	40	4	4	4	4	2	3	4	4	3	4	4	4	4	4	4	2	5	5	4	5	1	3	4	4
	41	3	4	3	4	3	4	4	3	2	4	4	4	3	4	4	2	5	5	3	4	4	4	4	1
	42	4	4	5	5	3	3	4	4	4	3	3	4	5	2	4	1	5	5	5	4	2	4	4	3
	43	4	4	4	4	2	2	3	4	3	3	3	4	3	2	2	1	4	5	2	3	2	3	3	3
	44	5	5	5	5	5	5	5	5	3	5	1	4	3	4	5	1	4	5	5	5	5	3	4	1
	45	4	4	4	3	4	4	4	4	4	4	4	4	4	4	4	5	4	3	4	3	4	4	4	4
	46	4	4	4	4	4	4	4	4	5	4	3	4	4	4	4	5	4	3	4	4	4	4	5	5
	47	3	3	3	4	4	4	4	3	2	3	4	4	4	4	2	5	3	3	4	4	4	4	4	4
	48	4	4	4	4	4	4	4	4	3	4	4	4	4	4	4	5	2	3	4	4	4	3	4	4
	49	4	4	4	4	4	4	4	4	3	3	4	5	4	4	4	5	2	3	5	3	4	5	2	4
	50	5	5	5	5	5	5	5	5	2	2	4	5	5	5	5	5	2	3	5	4	3	3	2	2
	51	5	4	4	4	4	4	4	4	5	5	4	4	4	4	4	5	2	4	4	4	4	3	4	5
	52	5	4	4	4	4	4	4	4	4	4	4	4	4	4	4	4	1	4	4	4	4	4	4	4
	53	5	1	1	5	5	2	2	3	4	4	4	1	2	3	4	4	4	4	2	1	3	4	4	4
	54	2	2	2	1	1	1	2	2	4	4	4	2	3	2	1	4	4	4	1	1	1	4	4	2
	55	2	3	3	3	3	4	4	4	4	4	4	3	3	3	3	4	4	5	4	4	4	4	4	4
	56	5	5	5	5	5	5	5	5	4	4	5	5	5	5	5	4	4	5	5	5	5	4	4	4
	57	4	5	3	3	3	3	3	4	5	5	5	4	3	3	4	4	4	5	3	4	3	5	5	5
	58	3	1	2	3	1	2	1	1	4	4	4	3	3	1	3	3	3	5	1	3	3	4	4	4
	59	4	4	4	5	5	5	4	4	4	4	4	5	5	5	4	3	4	5	1	1	1	4	4	4
	60	1	1	1	1	1	1	1	1	1	1	1	1	1	1	1	3	4	5	1	1	1	1	1	1
	61	4	4	4	4	4	4	4	4	4	4	4	4	4	4	4	3	4	5	3	4	4	4	4	4
	62	4	4	4	4	4	4	4	4	4	4	4	4	4	4	4	3	4	4	3	4	4	4	4	4
	63	4	4	4	4	4	4	4	4	4	4	4	4	4	4	4	3	4	4	4	4	4	4	4	4
	64	4	4	4	4	4	4	4	4	4	4	4	4	3	3	4	3	4	4	4	4	4	4	3	3
	65	3	3	3	3	3	3	3	3	3	3	3	3	3	3	3	3	4	3	3	3	3	3	3	3
	66	2	2	2	2	2	2	2	2	2	2	2	2	2	2	2	4	4	3	2	2	2	2	2	2
	67	4	4	4	4	3	4	4	4	4	3	4	4	4	4	4	4	4	2	4	3	4	4	4	4
	68	4	4	4	4	4	4	4	4	4	4	4	4	4	4	4	4	3	1	4	4	4	4	4	4
	69	5	5	5	5	5	4	5	5	5	5	4	5	5	5	5	4	2	4	5	5	5	5	5	5
	70	4	5	4	5	4	4	5	5	5	4	4	5	4	4	5	4	1	4	4	5	5	5	4	4
	71	4	1	4	4	4	1	1	3	4	4	1	4	4	4	4	4	2	4	1	1	4	4	4	4
	72	5	5	5	5	5	5	2	2	4	1	4	5	3	2	5	4	2	4	5	5	5	4	4	4
	73	4	4	4	5	5	5	5	3	4	4	4	5	5	5	4	4	3	5	4	4	5	4	4	4
	74	4	3	4	5	4	4	5	3	4	4	4	5	5	5	4	4	4	5	2	2	5	4	4	4
	75	5	5	5	2	3	3	5	5	4	4	5	2	4	4	5	4	4	5	3	4	5	4	4	4
	76	5	4	3	2	4	3	5	4	4	4	5	3	3	3	5	5	4	5	3	4	5	4	4	5
	77	3	2	3	2	5	4	3	3	4	4	5	4	5	4	3	5	4	5	3	4	5	5	5	5
	78	4	4	4	4	4	4	4	4	1	1	4	4	4	4	4	1	1	1	4	4	4	4	4	4
	79	4	4	4	4	4	4	3	5	4	4	4	4	4	4	4	4	4	4	4	4	4	4	4	3
	80	5	5	4	3	3	4	2	5	4	4	5	4	4	4	4	4	4	4	4	4	4	5	4	2
	81	4	5	4	3	3	3	1	4	4	4	4	3	3	3	3	4	4	4	3	3	3	5	4	1
	82	4	4	4	4	5	4	2	4	4	4	4	4	5	4	1	4	4	4	5	5	4	4	4	2
	83	2	5	4	1	4	4	2	3	3	3	2	4	4	4	2	3	3	3	4	4	4	5	4	2
	84	5	4	4	5	5	3	3	4	2	2	5	2	5	4	2	2	2	2	5	5	5	4	4	3
	85	5	4	4	5	5	5	4	3	3	4	5	5	4	4	3	3	4	4	5	5	5	4	4	4
	86	1	4	4	4	5	5	4	5	4	4	1	5	4	4	4	4	4	4	5	5	4	1	1	1
	87	4	5	5	3	2	4	5	2	5	4	4	4	5	4	4	5	5	5	5	2	3	4	4	4
	88	4	5	5	3	3	3	5	4	4	4	4	3	5	5	4	5	5	5	5	2	4	4	4	4
	89	5	5	5	4	4	5	5	5	4	1	4	4	3	5	4	1	4	4	5	2	5	4	4	5
	90	4	4	4	1	1	1	4	4	5	5	5	4	4	4	4	5	4	4	4	4	1	5	1	1
	91	4	4	4	4	4	4	3	4	4	4	4	4	4	4	1	1	1	1	4	4	4	4	4	4
	92	5	5	4	4	4	4	2	5	4	4	4	3	4	4	4	4	4	4	4	4	4	3	4	4
	93	4	5	4	4	4	4	1	4	5	5	4	1	4	4	4	4	4	4	3	3	4	2	4	4
	94	4	4	4	4	4	4	2	4	4	5	4	2	3	3	4	4	4	4	4	4	4	1	4	4
	95	2	5	4	3	3	3	2	2	4	4	4	4	4	4	4	4	4	4	4	3	3	2	3	3
	96	5	4	4	2	2	2	3	5	2	5	4	4	4	3	3	3	3	3	4	5	2	2	2	2
	97	5	4	4	4	3	5	4	5	5	4	4	4	4	5	2	2	2	2	3	5	5	3	3	4
	98	1	1	1	4	4	4	1	1	4	5	4	3	3	5	5	4	3	5	5	4	4	3	5	4
	99	4	4	4	5	2	3	4	3	4	4	4	4	5	4	4	4	4	4	3	3	3	4	4	4
	100	3	3	3	5	3	3	2	4	1	4	4	4	4	4	4	4	4	4	5	5	5	4	4	1
	101	2	2	2	5	2	2	5	5	2	2	5	2	5	1	2	5	5	4	1	4	4	5	4	2
	102	4	3	4	5	4	3	5	2	1	1	4	5	4	4	1	4	5	4	5	5	5	5	4	1
	103	4	4	5	5	3	1	5	4	1	1	1	1	3	3	1	5	2	5	4	5	5	1	4	4
	104	4	4	5	5	3	3	5	4	4	4	4	1	2	3	5	4	3	4	2	5	5	4	4	4
	105	5	5	5	3	1	1	5	4	4	4	4	1	1	2	4	4	2	3	1	1	3	4	5	4
	106	1	4	4	3	1	1	4	5	4	4	4	1	1	2	2	3	3	1	3	1	2	4	4	1
	107	4	4	4	2	4	4	4	3	4	4	4	4	5	4	3	3	2	3	1	1	1	4	4	4
	108	4	5	5	2	2	4	4	5	5	5	5	4	5	4	3	3	3	1	1	1	1	5	5	4
	MV descriptives
		Mean	Median	Observed min	Observed max	Standard deviation	Excess kurtosis	Skewness	Number of observations used	Cramér-von Mises test statistic	Cramér-von Mises p value
	ABL1	3.63303	4	1	5	1.14668	0.160157	-0.942961	109	1.49162	7.37e-10
	ABL2	3.63303	4	1	5	1.14668	0.329044	-1.017	109	1.62923	7.37e-10
	ABL3	3.56881	4	1	5	1.07828	0.314927	-0.892806	109	1.38366	7.37e-10
	CSE1	3.56881	4	1	5	1.14433	-0.0434244	-0.767479	109	1.00737	1.38157e-09
	CSE2	3.42202	4	1	5	1.15173	-0.341123	-0.665232	109	1.07615	8.29518e-10
	CSE3	3.42202	4	1	5	1.11119	-0.0721775	-0.736255	109	1.13392	7.37e-10
	ES1	3.45872	4	1	5	1.22311	-0.648524	-0.543602	109	0.79819	1.38434e-08
	ES2	3.56881	4	1	5	1.09517	0.166575	-0.8155	109	1.16375	7.37e-10
	PEOU1	3.53211	4	1	5	1.04547	0.275226	-0.86788	109	1.49236	7.37e-10
	PEOU2	3.51376	4	1	5	1.09724	0.491718	-1.1341	109	2.30439	7.37e-10
	PEOU3	3.74312	4	1	5	1.05277	1.31292	-1.28406	109	2.20095	7.37e-10
	PN1	3.50459	4	1	5	1.10565	0.0662351	-0.858345	109	1.4667	7.37e-10
	PN2	3.66055	4	1	5	0.988189	0.611906	-0.774541	109	1.10507	7.37e-10
	PN3	3.63303	4	1	5	0.954569	0.660865	-0.933366	109	1.80648	7.37e-10
	PN4	3.45872	4	1	5	1.13761	-0.160295	-0.787604	109	1.35714	7.37e-10
	PU1	3.79817	4	1	5	1.13961	0.18902	-0.876139	109	0.917953	3.22098e-09
	PU2	3.47706	4	1	5	1.00088	0.22719	-0.965959	109	2.14535	7.37e-10
	PU3	3.94495	4	1	5	1.07375	1.11252	-1.19655	109	1.31565	7.37e-10
	SN1	3.40367	4	1	5	1.22751	-0.437874	-0.694421	109	1.0517	9.80612e-10
	SN2	3.3945	4	1	5	1.20411	-0.412056	-0.67528	109	1.02709	1.17878e-09
	SN3	3.49541	4	1	5	1.2387	-0.367385	-0.782267	109	1.2421	7.37e-10
	SS1	3.47706	4	1	5	1.10542	0.127765	-0.912254	109	1.61384	7.37e-10
	SS2	3.51376	4	1	5	1.01922	0.658155	-1.0658	109	1.95285	7.37e-10
	SS3	3.36697	4	1	5	1.10595	-0.260559	-0.812616	109	1.70231	7.37e-10
	Indicator data (standardized)
	Matrix
	Case index	ABL1	ABL2	ABL3	CSE1	CSE2	CSE3	ES1	ES2	PEOU1	PEOU2	PEOU3	PN1	PN2	PN3	PN4	PU1	PU2	PU3	SN1	SN2	SN3	SS1	SS2	SS3
	0	1.19211	1.19211	1.32729	1.25068	1.37009	1.42008	1.26013	1.30682	0.447541	0.443146	0.244005	1.35252	1.35546	1.43203	1.35484	1.0546	-0.476643	0.982583	1.30046	1.33336	1.21465	0.473066	0.477071	0.572383
	1	-2.29622	-0.552053	1.32729	0.376809	0.501837	-0.379789	1.26013	1.30682	-0.508968	-0.46823	0.244005	-1.36082	1.35546	0.384438	-1.28226	1.0546	0.522474	0.982583	0.485806	-0.327624	1.21465	-2.24084	0.477071	0.572383
	2	1.19211	0.320031	-0.527512	-0.497067	0.501837	-0.379789	1.26013	0.393723	0.447541	0.443146	0.244005	-0.456373	-0.668446	-0.663155	1.35484	1.0546	-0.476643	0.982583	-0.328853	0.502865	-0.399945	0.473066	-0.504075	0.572383
	3	-0.552053	-0.552053	-0.527512	0.376809	0.501837	0.520146	-0.37504	-0.519379	-0.508968	-0.46823	-0.705871	0.448075	0.343507	0.384438	-0.403226	1.0546	-0.476643	0.0512652	-1.95817	-0.327624	1.21465	0.473066	-0.504075	0.572383
	4	0.320031	0.320031	-0.527512	-0.497067	-0.36642	-0.379789	0.442547	0.393723	-1.46548	-0.46823	-1.65575	-0.456373	-0.668446	-0.663155	-0.403226	1.0546	0.522474	0.0512652	0.485806	0.502865	0.407352	-1.3362	-0.504075	0.572383
	5	-2.29622	-2.29622	-0.527512	-0.497067	-0.36642	-0.379789	-0.37504	0.393723	0.447541	-2.29098	1.19388	-0.456373	-0.668446	0.384438	-1.28226	1.0546	0.522474	0.0512652	-0.328853	-1.9886	-2.01454	1.3777	-0.504075	0.572383
	6	-0.552053	-0.552053	-0.527512	-0.497067	0.501837	-0.379789	-0.37504	-0.519379	-0.508968	-0.46823	-0.705871	1.35252	0.343507	0.384438	-0.403226	0.177109	0.522474	0.982583	-0.328853	0.502865	-0.399945	-0.431569	-0.504075	0.572383
	7	0.320031	0.320031	0.399888	0.376809	-0.36642	0.520146	0.442547	0.393723	0.447541	-1.37961	-1.65575	0.448075	0.343507	0.384438	0.475806	0.177109	0.522474	0.982583	0.485806	-0.327624	0.407352	0.473066	-0.504075	0.572383
	8	-0.552053	0.320031	-1.45491	-2.24482	-1.23468	0.520146	-1.19263	-2.34558	-0.508968	-0.46823	-0.705871	0.448075	-0.668446	0.384438	0.475806	0.177109	0.522474	0.982583	0.485806	0.502865	0.407352	-0.431569	-1.48522	0.572383
	9	1.19211	0.320031	0.399888	0.376809	0.501837	0.520146	0.442547	0.393723	0.447541	0.443146	0.244005	0.448075	0.343507	0.384438	0.475806	0.177109	0.522474	0.982583	-0.328853	0.502865	0.407352	0.473066	0.477071	-1.23601
	10	-0.552053	0.320031	-2.38231	0.376809	0.501837	-0.379789	-0.37504	-0.519379	-2.42198	-2.29098	-2.60562	-0.456373	-0.668446	0.384438	-2.16129	0.177109	0.522474	0.982583	0.485806	-0.327624	0.407352	-2.24084	-2.46637	-1.23601
	11	0.320031	0.320031	0.399888	0.376809	0.501837	0.520146	0.442547	0.393723	-1.46548	-1.37961	-1.65575	0.448075	0.343507	0.384438	0.475806	-0.700384	0.522474	0.982583	0.485806	0.502865	0.407352	-2.24084	1.45822	-1.23601
	12	-1.42414	-1.42414	-0.527512	-0.497067	-1.23468	-1.27972	-0.37504	-1.43248	-0.508968	1.35452	0.244005	-0.456373	-0.668446	-0.663155	0.475806	-0.700384	0.522474	0.0512652	-1.95817	-1.15811	-1.20724	0.473066	0.477071	0.572383
	13	-1.42414	0.320031	-0.527512	-1.37094	-1.23468	-1.27972	-1.19263	-1.43248	0.447541	0.443146	-0.705871	-1.36082	-0.668446	-1.71075	-1.28226	-0.700384	0.522474	0.0512652	-0.328853	-1.15811	-1.20724	-0.431569	-0.504075	-0.331816
	14	-2.29622	0.320031	-1.45491	1.25068	0.501837	-2.17966	-0.37504	-0.519379	-2.42198	-2.29098	-0.705871	0.448075	-2.69235	1.43203	1.35484	-0.700384	0.522474	0.0512652	-1.14351	-0.327624	-2.01454	-0.431569	-0.504075	-0.331816
	15	-0.552053	-0.552053	-0.527512	-0.497067	-0.36642	-0.379789	-0.37504	-0.519379	0.447541	-0.46823	-0.705871	-0.456373	-0.668446	-0.663155	-0.403226	-0.700384	0.522474	0.0512652	0.485806	0.502865	0.407352	0.473066	-0.504075	1.47658
	16	0.320031	-1.42414	0.399888	-2.24482	-2.10293	1.42008	1.26013	0.393723	-0.508968	0.443146	0.244005	0.448075	-1.6804	-1.71075	0.475806	-0.700384	0.522474	0.0512652	-1.14351	-0.327624	-2.01454	-0.431569	0.477071	0.572383
	17	-0.552053	-0.552053	-0.527512	-0.497067	-0.36642	-0.379789	-0.37504	-0.519379	0.447541	0.443146	-2.60562	-0.456373	-0.668446	-0.663155	-0.403226	-1.57788	0.522474	0.0512652	-0.328853	-0.327624	-0.399945	-1.3362	0.477071	0.572383
	18	0.320031	0.320031	-0.527512	-0.497067	0.501837	0.520146	-0.37504	0.393723	0.447541	0.443146	0.244005	0.448075	0.343507	0.384438	0.475806	0.177109	-1.47576	-0.880053	-0.328853	-0.327624	0.407352	0.473066	0.477071	0.572383
	19	-2.29622	-2.29622	-2.38231	-2.24482	-2.10293	-2.17966	-2.01021	-2.34558	-0.508968	0.443146	0.244005	-2.26527	-2.69235	-2.75834	-2.16129	-2.45537	-1.47576	0.0512652	-1.95817	-1.9886	-2.01454	0.473066	-0.504075	-0.331816
	20	-2.29622	-2.29622	-2.38231	-2.24482	-2.10293	-2.17966	-2.01021	-2.34558	0.447541	0.443146	0.244005	-1.36082	-1.6804	-1.71075	-2.16129	1.0546	-1.47576	-0.880053	-1.95817	-1.9886	-2.01454	0.473066	0.477071	0.572383
	21	0.320031	0.320031	-0.527512	0.376809	0.501837	0.520146	0.442547	0.393723	-1.46548	-1.37961	-0.705871	-0.456373	-0.668446	-0.663155	0.475806	1.0546	-0.476643	0.0512652	-0.328853	0.502865	0.407352	-1.3362	-1.48522	-0.331816
	22	0.320031	0.320031	0.399888	0.376809	0.501837	0.520146	-0.37504	-0.519379	-1.46548	-1.37961	-1.65575	0.448075	0.343507	0.384438	0.475806	1.0546	-0.476643	0.982583	0.485806	0.502865	0.407352	-1.3362	-1.48522	-1.23601
	23	-1.42414	-1.42414	-1.45491	-1.37094	-1.23468	-1.27972	-1.19263	-1.43248	-0.508968	-2.29098	1.19388	-1.36082	-1.6804	-1.71075	-1.28226	1.0546	0.522474	0.982583	-1.14351	-1.15811	-1.20724	0.473066	-2.46637	0.572383
	24	1.19211	1.19211	1.32729	1.25068	1.37009	1.42008	1.26013	1.30682	0.447541	0.443146	-0.705871	1.35252	1.35546	1.43203	1.35484	1.0546	0.522474	0.982583	0.485806	-0.327624	-0.399945	-0.431569	-0.504075	-0.331816
	25	-1.42414	-2.29622	-1.45491	-0.497067	-1.23468	-1.27972	-2.01021	-2.34558	-0.508968	-2.29098	-2.60562	-1.36082	0.343507	-0.663155	-0.403226	1.0546	0.522474	0.982583	-1.14351	-1.15811	-2.01454	-2.24084	1.45822	0.572383
	26	0.320031	0.320031	0.399888	0.376809	0.501837	0.520146	0.442547	0.393723	1.40405	-0.46823	1.19388	0.448075	0.343507	0.384438	0.475806	-1.57788	0.522474	0.982583	0.485806	0.502865	0.407352	0.473066	0.477071	0.572383
	27	0.320031	0.320031	0.399888	0.376809	0.501837	0.520146	0.442547	0.393723	1.40405	-0.46823	0.244005	0.448075	0.343507	0.384438	0.475806	-0.700384	0.522474	-1.81137	0.485806	0.502865	0.407352	-0.431569	-0.504075	-0.331816
	28	0.320031	0.320031	0.399888	0.376809	0.501837	-0.379789	0.442547	0.393723	1.40405	0.443146	0.244005	0.448075	0.343507	0.384438	0.475806	-0.700384	0.522474	-1.81137	0.485806	0.502865	0.407352	-1.3362	-0.504075	-1.23601
	29	-0.552053	0.320031	0.399888	0.376809	0.501837	0.520146	1.26013	-0.519379	1.40405	0.443146	0.244005	0.448075	1.35546	0.384438	-0.403226	1.0546	-2.47488	-0.880053	0.485806	0.502865	0.407352	0.473066	-2.46637	1.47658
	30	0.320031	0.320031	-0.527512	0.376809	0.501837	0.520146	-0.37504	-0.519379	0.447541	0.443146	1.19388	0.448075	0.343507	0.384438	-0.403226	1.0546	-2.47488	0.0512652	0.485806	-0.327624	0.407352	-0.431569	-0.504075	-0.331816
	31	0.320031	0.320031	0.399888	0.376809	0.501837	0.520146	0.442547	0.393723	0.447541	0.443146	1.19388	0.448075	0.343507	0.384438	0.475806	1.0546	-0.476643	-2.74269	0.485806	-0.327624	0.407352	0.473066	-1.48522	-1.23601
	32	-0.552053	-0.552053	-0.527512	-0.497067	-0.36642	-0.379789	-0.37504	-0.519379	0.447541	0.443146	1.19388	-0.456373	-0.668446	-0.663155	-0.403226	1.0546	-0.476643	0.0512652	-0.328853	-0.327624	-0.399945	-0.431569	-0.504075	-0.331816
	33	0.320031	-0.552053	0.399888	-2.24482	-2.10293	-0.379789	0.442547	0.393723	0.447541	0.443146	1.19388	0.448075	-0.668446	0.384438	0.475806	1.0546	0.522474	0.0512652	0.485806	-1.15811	-1.20724	0.473066	0.477071	0.572383
	34	0.320031	0.320031	0.399888	0.376809	0.501837	0.520146	0.442547	0.393723	0.447541	0.443146	1.19388	0.448075	0.343507	0.384438	0.475806	1.0546	0.522474	0.0512652	0.485806	0.502865	0.407352	-2.24084	-2.46637	-2.14021
	35	0.320031	-0.552053	-1.45491	0.376809	0.501837	-0.379789	-0.37504	0.393723	-0.508968	0.443146	1.19388	-0.456373	0.343507	0.384438	-0.403226	1.0546	0.522474	0.0512652	0.485806	0.502865	-0.399945	-1.3362	-1.48522	-1.23601
	36	-0.552053	-0.552053	-0.527512	-0.497067	-0.36642	-0.379789	-0.37504	-0.519379	-0.508968	0.443146	0.244005	-0.456373	-0.668446	-0.663155	-0.403226	1.0546	0.522474	0.0512652	-0.328853	-0.327624	-0.399945	-0.431569	1.45822	0.572383
	37	0.320031	-2.29622	-2.38231	-0.497067	-0.36642	1.42008	-2.01021	-2.34558	-0.508968	0.443146	0.244005	-2.26527	-0.668446	0.384438	-2.16129	1.0546	0.522474	0.0512652	-1.95817	-1.9886	-1.20724	0.473066	0.477071	-0.331816
	38	0.320031	0.320031	0.399888	0.376809	0.501837	0.520146	0.442547	0.393723	-0.508968	0.443146	0.244005	0.448075	0.343507	0.384438	0.475806	-0.700384	0.522474	0.982583	0.485806	0.502865	0.407352	-2.24084	-2.46637	-0.331816
	39	0.320031	-1.42414	-2.38231	0.376809	1.37009	0.520146	-1.19263	-0.519379	-0.508968	0.443146	0.244005	-0.456373	0.343507	1.43203	1.35484	-0.700384	1.52159	0.982583	0.485806	-0.327624	0.407352	0.473066	-0.504075	-0.331816
	40	0.320031	0.320031	0.399888	0.376809	-1.23468	-0.379789	0.442547	0.393723	-0.508968	0.443146	0.244005	0.448075	0.343507	0.384438	0.475806	-1.57788	1.52159	0.982583	0.485806	1.33336	-2.01454	-0.431569	0.477071	0.572383
	41	-0.552053	0.320031	-0.527512	0.376809	-0.36642	0.520146	0.442547	-0.519379	-1.46548	0.443146	0.244005	0.448075	-0.668446	0.384438	0.475806	-1.57788	1.52159	0.982583	-0.328853	0.502865	0.407352	0.473066	0.477071	-2.14021
	42	0.320031	0.320031	1.32729	1.25068	-0.36642	-0.379789	0.442547	0.393723	0.447541	-0.46823	-0.705871	0.448075	1.35546	-1.71075	0.475806	-2.45537	1.52159	0.982583	1.30046	0.502865	-1.20724	0.473066	0.477071	-0.331816
	43	0.320031	0.320031	0.399888	0.376809	-1.23468	-1.27972	-0.37504	0.393723	-0.508968	-0.46823	-0.705871	0.448075	-0.668446	-1.71075	-1.28226	-2.45537	0.522474	0.982583	-1.14351	-0.327624	-1.20724	-0.431569	-0.504075	-0.331816
	44	1.19211	1.19211	1.32729	1.25068	1.37009	1.42008	1.26013	1.30682	-0.508968	1.35452	-2.60562	0.448075	-0.668446	0.384438	1.35484	-2.45537	0.522474	0.982583	1.30046	1.33336	1.21465	-0.431569	0.477071	-2.14021
	45	0.320031	0.320031	0.399888	-0.497067	0.501837	0.520146	0.442547	0.393723	0.447541	0.443146	0.244005	0.448075	0.343507	0.384438	0.475806	1.0546	0.522474	-0.880053	0.485806	-0.327624	0.407352	0.473066	0.477071	0.572383
	46	0.320031	0.320031	0.399888	0.376809	0.501837	0.520146	0.442547	0.393723	1.40405	0.443146	-0.705871	0.448075	0.343507	0.384438	0.475806	1.0546	0.522474	-0.880053	0.485806	0.502865	0.407352	0.473066	1.45822	1.47658
	47	-0.552053	-0.552053	-0.527512	0.376809	0.501837	0.520146	0.442547	-0.519379	-1.46548	-0.46823	0.244005	0.448075	0.343507	0.384438	-1.28226	1.0546	-0.476643	-0.880053	0.485806	0.502865	0.407352	0.473066	0.477071	0.572383
	48	0.320031	0.320031	0.399888	0.376809	0.501837	0.520146	0.442547	0.393723	-0.508968	0.443146	0.244005	0.448075	0.343507	0.384438	0.475806	1.0546	-1.47576	-0.880053	0.485806	0.502865	0.407352	-0.431569	0.477071	0.572383
	49	0.320031	0.320031	0.399888	0.376809	0.501837	0.520146	0.442547	0.393723	-0.508968	-0.46823	0.244005	1.35252	0.343507	0.384438	0.475806	1.0546	-1.47576	-0.880053	1.30046	-0.327624	0.407352	1.3777	-1.48522	0.572383
	50	1.19211	1.19211	1.32729	1.25068	1.37009	1.42008	1.26013	1.30682	-1.46548	-1.37961	0.244005	1.35252	1.35546	1.43203	1.35484	1.0546	-1.47576	-0.880053	1.30046	0.502865	-0.399945	-0.431569	-1.48522	-1.23601
	51	1.19211	0.320031	0.399888	0.376809	0.501837	0.520146	0.442547	0.393723	1.40405	1.35452	0.244005	0.448075	0.343507	0.384438	0.475806	1.0546	-1.47576	0.0512652	0.485806	0.502865	0.407352	-0.431569	0.477071	1.47658
	52	1.19211	0.320031	0.399888	0.376809	0.501837	0.520146	0.442547	0.393723	0.447541	0.443146	0.244005	0.448075	0.343507	0.384438	0.475806	0.177109	-2.47488	0.0512652	0.485806	0.502865	0.407352	0.473066	0.477071	0.572383
	53	1.19211	-2.29622	-2.38231	1.25068	1.37009	-1.27972	-1.19263	-0.519379	0.447541	0.443146	0.244005	-2.26527	-1.6804	-0.663155	0.475806	0.177109	0.522474	0.0512652	-1.14351	-1.9886	-0.399945	0.473066	0.477071	0.572383
	54	-1.42414	-1.42414	-1.45491	-2.24482	-2.10293	-2.17966	-1.19263	-1.43248	0.447541	0.443146	0.244005	-1.36082	-0.668446	-1.71075	-2.16129	0.177109	0.522474	0.0512652	-1.95817	-1.9886	-2.01454	0.473066	0.477071	-1.23601
	55	-1.42414	-0.552053	-0.527512	-0.497067	-0.36642	0.520146	0.442547	0.393723	0.447541	0.443146	0.244005	-0.456373	-0.668446	-0.663155	-0.403226	0.177109	0.522474	0.982583	0.485806	0.502865	0.407352	0.473066	0.477071	0.572383
	56	1.19211	1.19211	1.32729	1.25068	1.37009	1.42008	1.26013	1.30682	0.447541	0.443146	1.19388	1.35252	1.35546	1.43203	1.35484	0.177109	0.522474	0.982583	1.30046	1.33336	1.21465	0.473066	0.477071	0.572383
	57	0.320031	1.19211	-0.527512	-0.497067	-0.36642	-0.379789	-0.37504	0.393723	1.40405	1.35452	1.19388	0.448075	-0.668446	-0.663155	0.475806	0.177109	0.522474	0.982583	-0.328853	0.502865	-0.399945	1.3777	1.45822	1.47658
	58	-0.552053	-2.29622	-1.45491	-0.497067	-2.10293	-1.27972	-2.01021	-2.34558	0.447541	0.443146	0.244005	-0.456373	-0.668446	-2.75834	-0.403226	-0.700384	-0.476643	0.982583	-1.95817	-0.327624	-0.399945	0.473066	0.477071	0.572383
	59	0.320031	0.320031	0.399888	1.25068	1.37009	1.42008	0.442547	0.393723	0.447541	0.443146	0.244005	1.35252	1.35546	1.43203	0.475806	-0.700384	0.522474	0.982583	-1.95817	-1.9886	-2.01454	0.473066	0.477071	0.572383
	60	-2.29622	-2.29622	-2.38231	-2.24482	-2.10293	-2.17966	-2.01021	-2.34558	-2.42198	-2.29098	-2.60562	-2.26527	-2.69235	-2.75834	-2.16129	-0.700384	0.522474	0.982583	-1.95817	-1.9886	-2.01454	-2.24084	-2.46637	-2.14021
	61	0.320031	0.320031	0.399888	0.376809	0.501837	0.520146	0.442547	0.393723	0.447541	0.443146	0.244005	0.448075	0.343507	0.384438	0.475806	-0.700384	0.522474	0.982583	-0.328853	0.502865	0.407352	0.473066	0.477071	0.572383
	62	0.320031	0.320031	0.399888	0.376809	0.501837	0.520146	0.442547	0.393723	0.447541	0.443146	0.244005	0.448075	0.343507	0.384438	0.475806	-0.700384	0.522474	0.0512652	-0.328853	0.502865	0.407352	0.473066	0.477071	0.572383
	63	0.320031	0.320031	0.399888	0.376809	0.501837	0.520146	0.442547	0.393723	0.447541	0.443146	0.244005	0.448075	0.343507	0.384438	0.475806	-0.700384	0.522474	0.0512652	0.485806	0.502865	0.407352	0.473066	0.477071	0.572383
	64	0.320031	0.320031	0.399888	0.376809	0.501837	0.520146	0.442547	0.393723	0.447541	0.443146	0.244005	0.448075	-0.668446	-0.663155	0.475806	-0.700384	0.522474	0.0512652	0.485806	0.502865	0.407352	0.473066	-0.504075	-0.331816
	65	-0.552053	-0.552053	-0.527512	-0.497067	-0.36642	-0.379789	-0.37504	-0.519379	-0.508968	-0.46823	-0.705871	-0.456373	-0.668446	-0.663155	-0.403226	-0.700384	0.522474	-0.880053	-0.328853	-0.327624	-0.399945	-0.431569	-0.504075	-0.331816
	66	-1.42414	-1.42414	-1.45491	-1.37094	-1.23468	-1.27972	-1.19263	-1.43248	-1.46548	-1.37961	-1.65575	-1.36082	-1.6804	-1.71075	-1.28226	0.177109	0.522474	-0.880053	-1.14351	-1.15811	-1.20724	-1.3362	-1.48522	-1.23601
	67	0.320031	0.320031	0.399888	0.376809	-0.36642	0.520146	0.442547	0.393723	0.447541	-0.46823	0.244005	0.448075	0.343507	0.384438	0.475806	0.177109	0.522474	-1.81137	0.485806	-0.327624	0.407352	0.473066	0.477071	0.572383
	68	0.320031	0.320031	0.399888	0.376809	0.501837	0.520146	0.442547	0.393723	0.447541	0.443146	0.244005	0.448075	0.343507	0.384438	0.475806	0.177109	-0.476643	-2.74269	0.485806	0.502865	0.407352	0.473066	0.477071	0.572383
	69	1.19211	1.19211	1.32729	1.25068	1.37009	0.520146	1.26013	1.30682	1.40405	1.35452	0.244005	1.35252	1.35546	1.43203	1.35484	0.177109	-1.47576	0.0512652	1.30046	1.33336	1.21465	1.3777	1.45822	1.47658
	70	0.320031	1.19211	0.399888	1.25068	0.501837	0.520146	1.26013	1.30682	1.40405	0.443146	0.244005	1.35252	0.343507	0.384438	1.35484	0.177109	-2.47488	0.0512652	0.485806	1.33336	1.21465	1.3777	0.477071	0.572383
	71	0.320031	-2.29622	0.399888	0.376809	0.501837	-2.17966	-2.01021	-0.519379	0.447541	0.443146	-2.60562	0.448075	0.343507	0.384438	0.475806	0.177109	-1.47576	0.0512652	-1.95817	-1.9886	0.407352	0.473066	0.477071	0.572383
	72	1.19211	1.19211	1.32729	1.25068	1.37009	1.42008	-1.19263	-1.43248	0.447541	-2.29098	0.244005	1.35252	-0.668446	-1.71075	1.35484	0.177109	-1.47576	0.0512652	1.30046	1.33336	1.21465	0.473066	0.477071	0.572383
	73	0.320031	0.320031	0.399888	1.25068	1.37009	1.42008	1.26013	-0.519379	0.447541	0.443146	0.244005	1.35252	1.35546	1.43203	0.475806	0.177109	-0.476643	0.982583	0.485806	0.502865	1.21465	0.473066	0.477071	0.572383
	74	0.320031	-0.552053	0.399888	1.25068	0.501837	0.520146	1.26013	-0.519379	0.447541	0.443146	0.244005	1.35252	1.35546	1.43203	0.475806	0.177109	0.522474	0.982583	-1.14351	-1.15811	1.21465	0.473066	0.477071	0.572383
	75	1.19211	1.19211	1.32729	-1.37094	-0.36642	-0.379789	1.26013	1.30682	0.447541	0.443146	1.19388	-1.36082	0.343507	0.384438	1.35484	0.177109	0.522474	0.982583	-0.328853	0.502865	1.21465	0.473066	0.477071	0.572383
	76	1.19211	0.320031	-0.527512	-1.37094	0.501837	-0.379789	1.26013	0.393723	0.447541	0.443146	1.19388	-0.456373	-0.668446	-0.663155	1.35484	1.0546	0.522474	0.982583	-0.328853	0.502865	1.21465	0.473066	0.477071	1.47658
	77	-0.552053	-1.42414	-0.527512	-1.37094	1.37009	0.520146	-0.37504	-0.519379	0.447541	0.443146	1.19388	0.448075	1.35546	0.384438	-0.403226	1.0546	0.522474	0.982583	-0.328853	0.502865	1.21465	1.3777	1.45822	1.47658
	78	0.320031	0.320031	0.399888	0.376809	0.501837	0.520146	0.442547	0.393723	-2.42198	-2.29098	0.244005	0.448075	0.343507	0.384438	0.475806	-2.45537	-2.47488	-2.74269	0.485806	0.502865	0.407352	0.473066	0.477071	0.572383
	79	0.320031	0.320031	0.399888	0.376809	0.501837	0.520146	-0.37504	1.30682	0.447541	0.443146	0.244005	0.448075	0.343507	0.384438	0.475806	0.177109	0.522474	0.0512652	0.485806	0.502865	0.407352	0.473066	0.477071	-0.331816
	80	1.19211	1.19211	0.399888	-0.497067	-0.36642	0.520146	-1.19263	1.30682	0.447541	0.443146	1.19388	0.448075	0.343507	0.384438	0.475806	0.177109	0.522474	0.0512652	0.485806	0.502865	0.407352	1.3777	0.477071	-1.23601
	81	0.320031	1.19211	0.399888	-0.497067	-0.36642	-0.379789	-2.01021	0.393723	0.447541	0.443146	0.244005	-0.456373	-0.668446	-0.663155	-0.403226	0.177109	0.522474	0.0512652	-0.328853	-0.327624	-0.399945	1.3777	0.477071	-2.14021
	82	0.320031	0.320031	0.399888	0.376809	1.37009	0.520146	-1.19263	0.393723	0.447541	0.443146	0.244005	0.448075	1.35546	0.384438	-2.16129	0.177109	0.522474	0.0512652	1.30046	1.33336	0.407352	0.473066	0.477071	-1.23601
	83	-1.42414	1.19211	0.399888	-2.24482	0.501837	0.520146	-1.19263	-0.519379	-0.508968	-0.46823	-1.65575	0.448075	0.343507	0.384438	-1.28226	-0.700384	-0.476643	-0.880053	0.485806	0.502865	0.407352	1.3777	0.477071	-1.23601
	84	1.19211	0.320031	0.399888	1.25068	1.37009	-0.379789	-0.37504	0.393723	-1.46548	-1.37961	1.19388	-1.36082	1.35546	0.384438	-1.28226	-1.57788	-1.47576	-1.81137	1.30046	1.33336	1.21465	0.473066	0.477071	-0.331816
	85	1.19211	0.320031	0.399888	1.25068	1.37009	1.42008	0.442547	-0.519379	-0.508968	0.443146	1.19388	1.35252	0.343507	0.384438	-0.403226	-0.700384	0.522474	0.0512652	1.30046	1.33336	1.21465	0.473066	0.477071	0.572383
	86	-2.29622	0.320031	0.399888	0.376809	1.37009	1.42008	0.442547	1.30682	0.447541	0.443146	-2.60562	1.35252	0.343507	0.384438	0.475806	0.177109	0.522474	0.0512652	1.30046	1.33336	0.407352	-2.24084	-2.46637	-2.14021
	87	0.320031	1.19211	1.32729	-0.497067	-1.23468	0.520146	1.26013	-1.43248	1.40405	0.443146	0.244005	0.448075	1.35546	0.384438	0.475806	1.0546	1.52159	0.982583	1.30046	-1.15811	-0.399945	0.473066	0.477071	0.572383
	88	0.320031	1.19211	1.32729	-0.497067	-0.36642	-0.379789	1.26013	0.393723	0.447541	0.443146	0.244005	-0.456373	1.35546	1.43203	0.475806	1.0546	1.52159	0.982583	1.30046	-1.15811	0.407352	0.473066	0.477071	0.572383
	89	1.19211	1.19211	1.32729	0.376809	0.501837	1.42008	1.26013	1.30682	0.447541	-2.29098	0.244005	0.448075	-0.668446	1.43203	0.475806	-2.45537	0.522474	0.0512652	1.30046	-1.15811	1.21465	0.473066	0.477071	1.47658
	90	0.320031	0.320031	0.399888	-2.24482	-2.10293	-2.17966	0.442547	0.393723	1.40405	1.35452	1.19388	0.448075	0.343507	0.384438	0.475806	1.0546	0.522474	0.0512652	0.485806	0.502865	-2.01454	1.3777	-2.46637	-2.14021
	91	0.320031	0.320031	0.399888	0.376809	0.501837	0.520146	-0.37504	0.393723	0.447541	0.443146	0.244005	0.448075	0.343507	0.384438	-2.16129	-2.45537	-2.47488	-2.74269	0.485806	0.502865	0.407352	0.473066	0.477071	0.572383
	92	1.19211	1.19211	0.399888	0.376809	0.501837	0.520146	-1.19263	1.30682	0.447541	0.443146	0.244005	-0.456373	0.343507	0.384438	0.475806	0.177109	0.522474	0.0512652	0.485806	0.502865	0.407352	-0.431569	0.477071	0.572383
	93	0.320031	1.19211	0.399888	0.376809	0.501837	0.520146	-2.01021	0.393723	1.40405	1.35452	0.244005	-2.26527	0.343507	0.384438	0.475806	0.177109	0.522474	0.0512652	-0.328853	-0.327624	0.407352	-1.3362	0.477071	0.572383
	94	0.320031	0.320031	0.399888	0.376809	0.501837	0.520146	-1.19263	0.393723	0.447541	1.35452	0.244005	-1.36082	-0.668446	-0.663155	0.475806	0.177109	0.522474	0.0512652	0.485806	0.502865	0.407352	-2.24084	0.477071	0.572383
	95	-1.42414	1.19211	0.399888	-0.497067	-0.36642	-0.379789	-1.19263	-1.43248	0.447541	0.443146	0.244005	0.448075	0.343507	0.384438	0.475806	0.177109	0.522474	0.0512652	0.485806	-0.327624	-0.399945	-1.3362	-0.504075	-0.331816
	96	1.19211	0.320031	0.399888	-1.37094	-1.23468	-1.27972	-0.37504	1.30682	-1.46548	1.35452	0.244005	0.448075	0.343507	-0.663155	-0.403226	-0.700384	-0.476643	-0.880053	0.485806	1.33336	-1.20724	-1.3362	-1.48522	-1.23601
	97	1.19211	0.320031	0.399888	0.376809	-0.36642	1.42008	0.442547	1.30682	1.40405	0.443146	0.244005	0.448075	0.343507	1.43203	-1.28226	-1.57788	-1.47576	-1.81137	-0.328853	1.33336	1.21465	-0.431569	-0.504075	0.572383
	98	-2.29622	-2.29622	-2.38231	0.376809	0.501837	0.520146	-2.01021	-2.34558	0.447541	1.35452	0.244005	-0.456373	-0.668446	1.43203	1.35484	0.177109	-0.476643	0.982583	1.30046	0.502865	0.407352	-0.431569	1.45822	0.572383
	99	0.320031	0.320031	0.399888	1.25068	-1.23468	-0.379789	0.442547	-0.519379	0.447541	0.443146	0.244005	0.448075	1.35546	0.384438	0.475806	0.177109	0.522474	0.0512652	-0.328853	-0.327624	-0.399945	0.473066	0.477071	0.572383
	100	-0.552053	-0.552053	-0.527512	1.25068	-0.36642	-0.379789	-1.19263	0.393723	-2.42198	0.443146	0.244005	0.448075	0.343507	0.384438	0.475806	0.177109	0.522474	0.0512652	1.30046	1.33336	1.21465	0.473066	0.477071	-2.14021
	101	-1.42414	-1.42414	-1.45491	1.25068	-1.23468	-1.27972	1.26013	1.30682	-1.46548	-1.37961	1.19388	-1.36082	1.35546	-2.75834	-1.28226	1.0546	1.52159	0.0512652	-1.95817	0.502865	0.407352	1.3777	0.477071	-1.23601
	102	0.320031	-0.552053	0.399888	1.25068	0.501837	-0.379789	1.26013	-1.43248	-2.42198	-2.29098	0.244005	1.35252	0.343507	0.384438	-2.16129	0.177109	1.52159	0.0512652	1.30046	1.33336	1.21465	1.3777	0.477071	-2.14021
	103	0.320031	0.320031	1.32729	1.25068	-0.36642	-2.17966	1.26013	0.393723	-2.42198	-2.29098	-2.60562	-2.26527	-0.668446	-0.663155	-2.16129	1.0546	-1.47576	0.982583	0.485806	1.33336	1.21465	-2.24084	0.477071	0.572383
	104	0.320031	0.320031	1.32729	1.25068	-0.36642	-0.379789	1.26013	0.393723	0.447541	0.443146	0.244005	-2.26527	-1.6804	-0.663155	1.35484	0.177109	-0.476643	0.0512652	-1.14351	1.33336	1.21465	0.473066	0.477071	0.572383
	105	1.19211	1.19211	1.32729	-0.497067	-2.10293	-2.17966	1.26013	0.393723	0.447541	0.443146	0.244005	-2.26527	-2.69235	-1.71075	0.475806	0.177109	-1.47576	-0.880053	-1.95817	-1.9886	-0.399945	0.473066	1.45822	0.572383
	106	-2.29622	0.320031	0.399888	-0.497067	-2.10293	-2.17966	0.442547	1.30682	0.447541	0.443146	0.244005	-2.26527	-2.69235	-1.71075	-1.28226	-0.700384	-0.476643	-2.74269	-0.328853	-1.9886	-1.20724	0.473066	0.477071	-2.14021
	107	0.320031	0.320031	0.399888	-1.37094	0.501837	0.520146	0.442547	-0.519379	0.447541	0.443146	0.244005	0.448075	1.35546	0.384438	-0.403226	-0.700384	-1.47576	-0.880053	-1.95817	-1.9886	-2.01454	0.473066	0.477071	0.572383
	108	0.320031	1.19211	1.32729	-1.37094	-1.23468	0.520146	0.442547	1.30682	1.40405	1.35452	1.19388	0.448075	1.35546	0.384438	-0.403226	-0.700384	-0.476643	-2.74269	-1.95817	-1.9886	-2.01454	1.3777	1.45822	0.572383
	Indicator data (correlations)
	Empirical correlation matrix
		ABL1	ABL2	ABL3	CSE1	CSE2	CSE3	ES1	ES2	PEOU1	PEOU2	PEOU3	PN1	PN2	PN3	PN4	PU1	PU2	PU3	SN1	SN2	SN3	SS1	SS2	SS3
	ABL1	1	0.560428	0.547235	0.38281	0.415975	0.467153	0.414384	0.502271	0.231761	0.222765	0.2335	0.363142	0.392044	0.371479	0.466625	-0.0285977	-0.135233	-0.0238577	0.339887	0.383921	0.418649	0.174304	0.177019	0.185768
	ABL2	0.560428	1	0.747573	0.305902	0.346508	0.438352	0.505962	0.619159	0.239413	0.15714	0.111904	0.428268	0.367755	0.413387	0.438494	-0.0777421	-0.0872707	-0.113273	0.528906	0.450367	0.386354	0.0584998	0.0435707	-0.00232293
	ABL3	0.547235	0.747573	1	0.354909	0.279499	0.396893	0.63691	0.658289	0.309327	0.148468	0.112552	0.436442	0.482552	0.363233	0.400574	-0.0782895	-0.115423	-0.131435	0.450345	0.357125	0.365994	0.111004	0.209921	0.10961
	CSE1	0.38281	0.305902	0.354909	1	0.660145	0.395632	0.36418	0.37872	-0.0612779	-0.101221	-0.0157896	0.338741	0.397911	0.434656	0.342218	-0.052666	-0.0687108	0.0478819	0.398229	0.456362	0.545511	-0.0259498	0.134878	0.0235431
	CSE2	0.415975	0.346508	0.279499	0.660145	1	0.65655	0.246822	0.347925	0.0573189	0.00266412	0.0137444	0.481183	0.504729	0.649897	0.377405	0.0648962	-0.134859	0.0410403	0.502474	0.468722	0.631561	-0.00680935	0.0497609	0.108897
	CSE3	0.467153	0.438352	0.396893	0.395632	0.65655	1	0.343581	0.345541	0.233149	0.153253	0.15541	0.61075	0.531499	0.613064	0.412948	-0.00518438	-0.0407909	-0.00359771	0.493903	0.417256	0.494637	0.0751004	0.0920796	0.172593
	ES1	0.414384	0.505962	0.63691	0.36418	0.246822	0.343581	1	0.606544	0.103274	0.0294765	0.169885	0.385136	0.356542	0.340624	0.369656	0.0598409	-0.0213825	-0.0157016	0.328851	0.331869	0.3526	0.123135	0.0538112	0.160409
	ES2	0.502271	0.619159	0.658289	0.37872	0.347925	0.345541	0.606544	1	0.200392	0.191987	0.198345	0.293334	0.364909	0.357633	0.372307	-0.0476792	-0.0383163	-0.18402	0.381982	0.407276	0.346826	0.0789801	0.0833979	-0.0208474
	PEOU1	0.231761	0.239413	0.309327	-0.0612779	0.0573189	0.233149	0.103274	0.200392	1	0.601435	0.365918	0.156624	0.236995	0.158895	0.311594	0.0670418	-0.0760123	-0.0883241	0.032793	-0.0792966	0.0443905	0.336037	0.234204	0.394474
	PEOU2	0.222765	0.15714	0.148468	-0.101221	0.00266412	0.153253	0.0294765	0.191987	0.601435	1	0.344573	0.0963675	0.177763	0.144969	0.296285	0.0168951	-0.0226857	-0.0460789	-0.0177476	0.0549144	0.015234	0.191248	0.24799	0.109242
	PEOU3	0.2335	0.111904	0.112552	-0.0157896	0.0137444	0.15541	0.169885	0.198345	0.365918	0.344573	1	0.0955935	0.198378	0.125296	0.152011	0.14031	-0.0404185	-0.182943	0.0518445	0.0509928	0.0413073	0.507358	0.157197	0.17552
	PN1	0.363142	0.428268	0.436442	0.338741	0.481183	0.61075	0.385136	0.293334	0.156624	0.0963675	0.0955935	1	0.585007	0.583999	0.428669	-0.0429521	-0.06001	0.00794047	0.47182	0.429337	0.279686	0.223401	-0.0265151	0.0511426
	PN2	0.392044	0.367755	0.482552	0.397911	0.504729	0.531499	0.356542	0.364909	0.236995	0.177763	0.198378	0.585007	1	0.607105	0.22012	0.150974	-0.00323376	0.00832903	0.415494	0.351559	0.369726	0.148247	0.127609	0.122376
	PN3	0.371479	0.413387	0.363233	0.434656	0.649897	0.613064	0.340624	0.357633	0.158895	0.144969	0.125296	0.583999	0.607105	1	0.43381	0.109017	-0.0280145	-0.00180659	0.494417	0.285587	0.417556	0.0789674	0.0711989	0.136253
	PN4	0.466625	0.438494	0.400574	0.342218	0.377405	0.412948	0.369656	0.372307	0.311594	0.296285	0.152011	0.428669	0.22012	0.43381	1	0.0714148	0.0495271	0.178395	0.314146	0.303231	0.294464	0.0959116	0.129068	0.216216
	PU1	-0.0285977	-0.0777421	-0.0782895	-0.052666	0.0648962	-0.00518438	0.0598409	-0.0476792	0.0670418	0.0168951	0.14031	-0.0429521	0.150974	0.109017	0.0714148	1	-0.0281884	0.133372	0.0320094	-0.0422614	0.103329	-0.0255227	-0.123986	0.0951632
	PU2	-0.135233	-0.0872707	-0.115423	-0.0687108	-0.134859	-0.0407909	-0.0213825	-0.0383163	-0.0760123	-0.0226857	-0.0404185	-0.06001	-0.00323376	-0.0280145	0.0495271	-0.0281884	1	0.451268	0.0224705	-0.0495857	-0.138832	-0.106199	0.00255776	-0.241039
	PU3	-0.0238577	-0.113273	-0.131435	0.0478819	0.0410403	-0.00359771	-0.0157016	-0.18402	-0.0883241	-0.0460789	-0.182943	0.00794047	0.00832903	-0.00180659	0.178395	0.133372	0.451268	1	0.0029375	0.0806586	0.0480941	-0.163381	-0.00769093	0.0556389
	SN1	0.339887	0.528906	0.450345	0.398229	0.502474	0.493903	0.328851	0.381982	0.032793	-0.0177476	0.0518445	0.47182	0.415494	0.494417	0.314146	0.0320094	0.0224705	0.0029375	1	0.668138	0.550283	-0.0675497	-0.0704374	-0.0685712
	SN2	0.383921	0.450367	0.357125	0.456362	0.468722	0.417256	0.331869	0.407276	-0.0792966	0.0549144	0.0509928	0.429337	0.351559	0.285587	0.303231	-0.0422614	-0.0495857	0.0806586	0.668138	1	0.637835	-0.0655742	-0.0156369	-0.0604863
	SN3	0.418649	0.386354	0.365994	0.545511	0.631561	0.494637	0.3526	0.346826	0.0443905	0.015234	0.0413073	0.279686	0.369726	0.417556	0.294464	0.103329	-0.138832	0.0480941	0.550283	0.637835	1	0.0484987	0.139935	0.141863
	SS1	0.174304	0.0584998	0.111004	-0.0259498	-0.00680935	0.0751004	0.123135	0.0789801	0.336037	0.191248	0.507358	0.223401	0.148247	0.0789674	0.0959116	-0.0255227	-0.106199	-0.163381	-0.0675497	-0.0655742	0.0484987	1	0.385033	0.224509
	SS2	0.177019	0.0435707	0.209921	0.134878	0.0497609	0.0920796	0.0538112	0.0833979	0.234204	0.24799	0.157197	-0.0265151	0.127609	0.0711989	0.129068	-0.123986	0.00255776	-0.00769093	-0.0704374	-0.0156369	0.139935	0.385033	1	0.40247
	SS3	0.185768	-0.00232293	0.10961	0.0235431	0.108897	0.172593	0.160409	-0.0208474	0.394474	0.109242	0.17552	0.0511426	0.122376	0.136253	0.216216	0.0951632	-0.241039	0.0556389	-0.0685712	-0.0604863	0.141863	0.224509	0.40247	1
	Model implied saturated correlation matrix
		ABL1	ABL2	ABL3	CSE1	CSE2	CSE3	ES1	ES2	PEOU1	PEOU2	PEOU3	PN1	PN2	PN3	PN4	PU1	PU2	PU3	SN1	SN2	SN3	SS1	SS2	SS3
	ABL1	1	0.703564	0.712185	0.15573	0.284352	0.380401	0.505401	0.521154	0.203812	0.190653	0.148868	0.375181	0.368604	0.397218	0.370823	-0.0787885	-0.0521922	-0.0824505	-0.00841946	-0.0019907	0.0253806	0.0941267	0.114314	0.107998
	ABL2	0.703564	1	0.810967	0.17733	0.323793	0.433164	0.575502	0.59344	0.232081	0.217097	0.169517	0.42722	0.419731	0.452313	0.422257	-0.0897167	-0.0594314	-0.0938867	-0.00958726	-0.00226681	0.028901	0.107182	0.13017	0.122978
	ABL3	0.712185	0.810967	1	0.179503	0.32776	0.438472	0.582554	0.600712	0.234925	0.219757	0.171594	0.432455	0.424874	0.457855	0.427431	-0.090816	-0.0601596	-0.0950371	-0.00970474	-0.00229459	0.0292551	0.108496	0.131765	0.124484
	CSE1	0.15573	0.17733	0.179503	1	0.300299	0.401734	0.134403	0.138592	0.0788839	0.073791	0.0576185	0.213472	0.20973	0.22601	0.210992	-0.00122949	-0.000814454	-0.00128663	-0.0144793	-0.00342348	0.0436481	0.0398718	0.0484231	0.0457476
	CSE2	0.284352	0.323793	0.32776	0.300299	1	0.733541	0.245411	0.25306	0.144037	0.134738	0.105208	0.389786	0.382953	0.41268	0.385258	-0.00224497	-0.00148714	-0.00234931	-0.0264382	-0.00625105	0.0796986	0.0728034	0.0884174	0.0835323
	CSE3	0.380401	0.433164	0.438472	0.401734	0.733541	1	0.328306	0.338539	0.19269	0.180249	0.140745	0.521448	0.512307	0.552076	0.51539	-0.00300327	-0.00198947	-0.00314286	-0.0353686	-0.00836254	0.106619	0.097395	0.118283	0.111748
	ES1	0.505401	0.575502	0.582554	0.134403	0.245411	0.328306	1	0.802311	0.161853	0.151403	0.118221	0.352141	0.345968	0.372825	0.348051	-0.0451655	-0.0299192	-0.0472648	-0.0124486	-0.00294334	0.0375265	0.0662264	0.0804299	0.075986
	ES2	0.521154	0.59344	0.600712	0.138592	0.25306	0.338539	0.802311	1	0.166898	0.156122	0.121906	0.363117	0.356752	0.384446	0.358899	-0.0465733	-0.0308517	-0.048738	-0.0128366	-0.00303509	0.0386962	0.0682906	0.0829368	0.0783545
	PEOU1	0.203812	0.232081	0.234925	0.0788839	0.144037	0.19269	0.161853	0.166898	1	0.730108	0.570093	0.224051	0.220123	0.237211	0.221448	-0.0170758	-0.0113116	-0.0178695	-0.00768134	-0.00181617	0.0231556	0.254133	0.308636	0.291584
	PEOU2	0.190653	0.217097	0.219757	0.073791	0.134738	0.180249	0.151403	0.156122	0.730108	1	0.533286	0.209585	0.205911	0.221896	0.207151	-0.0159733	-0.0105813	-0.0167158	-0.00718541	-0.00169892	0.0216606	0.237725	0.28871	0.272758
	PEOU3	0.148868	0.169517	0.171594	0.0576185	0.105208	0.140745	0.118221	0.121906	0.570093	0.533286	1	0.163651	0.160783	0.173264	0.16175	-0.0124725	-0.00826223	-0.0130522	-0.00561061	-0.00132657	0.0169133	0.185624	0.225435	0.212979
	PN1	0.375181	0.42722	0.432455	0.213472	0.389786	0.521448	0.352141	0.363117	0.224051	0.209585	0.163651	1	0.574061	0.618623	0.577516	0.0678554	0.0449497	0.0710093	-0.00771549	-0.00182425	0.0232585	0.109288	0.132726	0.125393
	PN2	0.368604	0.419731	0.424874	0.20973	0.382953	0.512307	0.345968	0.356752	0.220123	0.205911	0.160783	0.574061	1	0.607779	0.567392	0.066666	0.0441618	0.0697645	-0.00758025	-0.00179227	0.0228508	0.107372	0.1304	0.123195
	PN3	0.397218	0.452313	0.457855	0.22601	0.41268	0.552076	0.372825	0.384446	0.237211	0.221896	0.173264	0.618623	0.607779	1	0.611437	0.071841	0.0475899	0.0751802	-0.00816868	-0.0019314	0.0246247	0.115707	0.140522	0.132758
	PN4	0.370823	0.422257	0.427431	0.210992	0.385258	0.51539	0.348051	0.358899	0.221448	0.207151	0.16175	0.577516	0.567392	0.611437	1	0.0670672	0.0444276	0.0701844	-0.00762587	-0.00180306	0.0229883	0.108018	0.131185	0.123937
	PU1	-0.0787885	-0.0897167	-0.090816	-0.00122949	-0.00224497	-0.00300327	-0.0451655	-0.0465733	-0.0170758	-0.0159733	-0.0124725	0.0678554	0.066666	0.071841	0.0670672	1	0.341514	0.539506	-0.00899372	-0.00212647	0.0271118	-0.0345976	-0.0420177	-0.0396961
	PU2	-0.0521922	-0.0594314	-0.0601596	-0.000814454	-0.00148714	-0.00198947	-0.0299192	-0.0308517	-0.0113116	-0.0105813	-0.00826223	0.0449497	0.0441618	0.0475899	0.0444276	0.341514	1	0.357387	-0.00595775	-0.00140865	0.0179598	-0.0229186	-0.0278339	-0.0262961
	PU3	-0.0824505	-0.0938867	-0.0950371	-0.00128663	-0.00234931	-0.00314286	-0.0472648	-0.048738	-0.0178695	-0.0167158	-0.0130522	0.0710093	0.0697645	0.0751802	0.0701844	0.539506	0.357387	1	-0.00941174	-0.00222531	0.0283719	-0.0362056	-0.0439706	-0.0415412
	SN1	-0.00841946	-0.00958726	-0.00970474	-0.0144793	-0.0264382	-0.0353686	-0.0124486	-0.0128366	-0.00768134	-0.00718541	-0.00561061	-0.00771549	-0.00758025	-0.00816868	-0.00762587	-0.00899372	-0.00595775	-0.00941174	1	0.0111337	-0.14195	-0.0406957	-0.0494236	-0.0466929
	SN2	-0.0019907	-0.00226681	-0.00229459	-0.00342348	-0.00625105	-0.00836254	-0.00294334	-0.00303509	-0.00181617	-0.00169892	-0.00132657	-0.00182425	-0.00179227	-0.0019314	-0.00180306	-0.00212647	-0.00140865	-0.00222531	0.0111337	1	-0.0335626	-0.00962208	-0.0116857	-0.0110401
	SN3	0.0253806	0.028901	0.0292551	0.0436481	0.0796986	0.106619	0.0375265	0.0386962	0.0231556	0.0216606	0.0169133	0.0232585	0.0228508	0.0246247	0.0229883	0.0271118	0.0179598	0.0283719	-0.14195	-0.0335626	1	0.122678	0.148989	0.140757
	SS1	0.0941267	0.107182	0.108496	0.0398718	0.0728034	0.097395	0.0662264	0.0682906	0.254133	0.237725	0.185624	0.109288	0.107372	0.115707	0.108018	-0.0345976	-0.0229186	-0.0362056	-0.0406957	-0.00962208	0.122678	1	0.536833	0.507173
	SS2	0.114314	0.13017	0.131765	0.0484231	0.0884174	0.118283	0.0804299	0.0829368	0.308636	0.28871	0.225435	0.132726	0.1304	0.140522	0.131185	-0.0420177	-0.0278339	-0.0439706	-0.0494236	-0.0116857	0.148989	0.536833	1	0.615945
	SS3	0.107998	0.122978	0.124484	0.0457476	0.0835323	0.111748	0.075986	0.0783545	0.291584	0.272758	0.212979	0.125393	0.123195	0.132758	0.123937	-0.0396961	-0.0262961	-0.0415412	-0.0466929	-0.0110401	0.140757	0.507173	0.615945	1
	Model implied estimated correlation matrix
		ABL1	ABL2	ABL3	CSE1	CSE2	CSE3	ES1	ES2	PEOU1	PEOU2	PEOU3	PN1	PN2	PN3	PN4	PU1	PU2	PU3	SN1	SN2	SN3	SS1	SS2	SS3
	ABL1	1	0.691543	0.700016	0.0214644	0.0391925	0.0524311	0.496766	0.51225	0.183747	0.171884	0.134213	0.0506743	0.049786	0.0536508	0.0500857	-0.0642915	-0.0425889	-0.0672798	-0.0032357	-0.000765048	0.00975408	0.036904	0.0448188	0.0423425
	ABL2	0.691543	1	0.797111	0.0244415	0.0446287	0.0597034	0.565669	0.583301	0.209233	0.195724	0.152828	0.057703	0.0566915	0.0610923	0.0570327	-0.073209	-0.0484961	-0.0766117	-0.0036845	-0.000871163	0.011107	0.0420228	0.0510353	0.0482156
	ABL3	0.700016	0.797111	1	0.024741	0.0451755	0.060435	0.5726	0.590448	0.211797	0.198123	0.154701	0.0584101	0.0573862	0.0618409	0.0577315	-0.074106	-0.0490904	-0.0775504	-0.00372965	-0.000881837	0.0112431	0.0425377	0.0516607	0.0488064
	CSE1	0.0214644	0.0244415	0.024741	1	0.300299	0.401734	0.0175574	0.0181047	0.0788839	0.073791	0.0576185	0.213472	0.20973	0.22601	0.210992	-0.00122949	-0.000814454	-0.00128663	-0.0144793	-0.00342348	0.0436481	0.0398718	0.0484231	0.0457476
	CSE2	0.0391925	0.0446287	0.0451755	0.300299	1	0.733541	0.0320588	0.033058	0.144037	0.134738	0.105208	0.389786	0.382953	0.41268	0.385258	-0.00224497	-0.00148714	-0.00234931	-0.0264382	-0.00625105	0.0796986	0.0728034	0.0884174	0.0835323
	CSE3	0.0524311	0.0597034	0.060435	0.401734	0.733541	1	0.0428876	0.0442244	0.19269	0.180249	0.140745	0.521448	0.512307	0.552076	0.51539	-0.00300327	-0.00198947	-0.00314286	-0.0353686	-0.00836254	0.106619	0.097395	0.118283	0.111748
	ES1	0.496766	0.565669	0.5726	0.0175574	0.0320588	0.0428876	1	0.795028	0.150301	0.140597	0.109783	0.0414506	0.040724	0.0438853	0.0409691	-0.0525893	-0.0348369	-0.0550336	-0.00264674	-0.000625795	0.00797865	0.0301868	0.0366609	0.0346354
	ES2	0.51225	0.583301	0.590448	0.0181047	0.033058	0.0442244	0.795028	1	0.154986	0.14498	0.113205	0.0427426	0.0419934	0.0452532	0.0422461	-0.0542285	-0.0359228	-0.056749	-0.00272924	-0.000645301	0.00822735	0.0311277	0.0378036	0.035715
	PEOU1	0.183747	0.209233	0.211797	0.0788839	0.144037	0.19269	0.150301	0.154986	1	0.730108	0.570093	0.224051	0.220123	0.237211	0.221448	0.0282227	0.0186957	0.0295345	-0.00768134	-0.00181617	0.0231556	0.0463374	0.0562753	0.0531661
	PEOU2	0.171884	0.195724	0.198123	0.073791	0.134738	0.180249	0.140597	0.14498	0.730108	1	0.533286	0.209585	0.205911	0.221896	0.207151	0.0264006	0.0174886	0.0276276	-0.00718541	-0.00169892	0.0216606	0.0433457	0.052642	0.0497335
	PEOU3	0.134213	0.152828	0.154701	0.0576185	0.105208	0.140745	0.109783	0.113205	0.570093	0.533286	1	0.163651	0.160783	0.173264	0.16175	0.0206145	0.0136557	0.0215726	-0.00561061	-0.00132657	0.0169133	0.0338458	0.0411047	0.0388336
	PN1	0.0506743	0.057703	0.0584101	0.213472	0.389786	0.521448	0.0414506	0.0427426	0.224051	0.209585	0.163651	1	0.574061	0.618623	0.577516	0.0678554	0.0449497	0.0710093	-0.00771549	-0.00182425	0.0232585	0.109288	0.132726	0.125393
	PN2	0.049786	0.0566915	0.0573862	0.20973	0.382953	0.512307	0.040724	0.0419934	0.220123	0.205911	0.160783	0.574061	1	0.607779	0.567392	0.066666	0.0441618	0.0697645	-0.00758025	-0.00179227	0.0228508	0.107372	0.1304	0.123195
	PN3	0.0536508	0.0610923	0.0618409	0.22601	0.41268	0.552076	0.0438853	0.0452532	0.237211	0.221896	0.173264	0.618623	0.607779	1	0.611437	0.071841	0.0475899	0.0751802	-0.00816868	-0.0019314	0.0246247	0.115707	0.140522	0.132758
	PN4	0.0500857	0.0570327	0.0577315	0.210992	0.385258	0.51539	0.0409691	0.0422461	0.221448	0.207151	0.16175	0.577516	0.567392	0.611437	1	0.0670672	0.0444276	0.0701844	-0.00762587	-0.00180306	0.0229883	0.108018	0.131185	0.123937
	PU1	-0.0642915	-0.073209	-0.074106	-0.00122949	-0.00224497	-0.00300327	-0.0525893	-0.0542285	0.0282227	0.0264006	0.0206145	0.0678554	0.066666	0.071841	0.0670672	1	0.341514	0.539506	-0.00899372	-0.00212647	0.0271118	0.022742	0.0276194	0.0260934
	PU2	-0.0425889	-0.0484961	-0.0490904	-0.000814454	-0.00148714	-0.00198947	-0.0348369	-0.0359228	0.0186957	0.0174886	0.0136557	0.0449497	0.0441618	0.0475899	0.0444276	0.341514	1	0.357387	-0.00595775	-0.00140865	0.0179598	0.0150651	0.018296	0.0172852
	PU3	-0.0672798	-0.0766117	-0.0775504	-0.00128663	-0.00234931	-0.00314286	-0.0550336	-0.056749	0.0295345	0.0276276	0.0215726	0.0710093	0.0697645	0.0751802	0.0701844	0.539506	0.357387	1	-0.00941174	-0.00222531	0.0283719	0.023799	0.0289032	0.0273062
	SN1	-0.0032357	-0.0036845	-0.00372965	-0.0144793	-0.0264382	-0.0353686	-0.00264674	-0.00272924	-0.00768134	-0.00718541	-0.00561061	-0.00771549	-0.00758025	-0.00816868	-0.00762587	-0.00899372	-0.00595775	-0.00941174	1	0.0111337	-0.14195	-0.0406957	-0.0494236	-0.0466929
	SN2	-0.000765048	-0.000871163	-0.000881837	-0.00342348	-0.00625105	-0.00836254	-0.000625795	-0.000645301	-0.00181617	-0.00169892	-0.00132657	-0.00182425	-0.00179227	-0.0019314	-0.00180306	-0.00212647	-0.00140865	-0.00222531	0.0111337	1	-0.0335626	-0.00962208	-0.0116857	-0.0110401
	SN3	0.00975408	0.011107	0.0112431	0.0436481	0.0796986	0.106619	0.00797865	0.00822735	0.0231556	0.0216606	0.0169133	0.0232585	0.0228508	0.0246247	0.0229883	0.0271118	0.0179598	0.0283719	-0.14195	-0.0335626	1	0.122678	0.148989	0.140757
	SS1	0.036904	0.0420228	0.0425377	0.0398718	0.0728034	0.097395	0.0301868	0.0311277	0.0463374	0.0433457	0.0338458	0.109288	0.107372	0.115707	0.108018	0.022742	0.0150651	0.023799	-0.0406957	-0.00962208	0.122678	1	0.536833	0.507173
	SS2	0.0448188	0.0510353	0.0516607	0.0484231	0.0884174	0.118283	0.0366609	0.0378036	0.0562753	0.052642	0.0411047	0.132726	0.1304	0.140522	0.131185	0.0276194	0.018296	0.0289032	-0.0494236	-0.0116857	0.148989	0.536833	1	0.615945
	SS3	0.0423425	0.0482156	0.0488064	0.0457476	0.0835323	0.111748	0.0346354	0.035715	0.0531661	0.0497335	0.0388336	0.125393	0.123195	0.132758	0.123937	0.0260934	0.0172852	0.0273062	-0.0466929	-0.0110401	0.140757	0.507173	0.615945	1
	Empirical covariance matrix
		ABL1	ABL2	ABL3	CSE1	CSE2	CSE3	ES1	ES2	PEOU1	PEOU2	PEOU3	PN1	PN2	PN3	PN4	PU1	PU2	PU3	SN1	SN2	SN3	SS1	SS2	SS3
	ABL1	1	0.560428	0.547235	0.38281	0.415975	0.467153	0.414384	0.502271	0.231761	0.222765	0.2335	0.363142	0.392044	0.371479	0.466625	-0.0285977	-0.135233	-0.0238577	0.339887	0.383921	0.418649	0.174304	0.177019	0.185768
	ABL2	0.560428	1	0.747573	0.305902	0.346508	0.438352	0.505962	0.619159	0.239413	0.15714	0.111904	0.428268	0.367755	0.413387	0.438494	-0.0777421	-0.0872707	-0.113273	0.528906	0.450367	0.386354	0.0584998	0.0435707	-0.00232293
	ABL3	0.547235	0.747573	1	0.354909	0.279499	0.396893	0.63691	0.658289	0.309327	0.148468	0.112552	0.436442	0.482552	0.363233	0.400574	-0.0782895	-0.115423	-0.131435	0.450345	0.357125	0.365994	0.111004	0.209921	0.10961
	CSE1	0.38281	0.305902	0.354909	1	0.660145	0.395632	0.36418	0.37872	-0.0612779	-0.101221	-0.0157896	0.338741	0.397911	0.434656	0.342218	-0.052666	-0.0687108	0.0478819	0.398229	0.456362	0.545511	-0.0259498	0.134878	0.0235431
	CSE2	0.415975	0.346508	0.279499	0.660145	1	0.65655	0.246822	0.347925	0.0573189	0.00266412	0.0137444	0.481183	0.504729	0.649897	0.377405	0.0648962	-0.134859	0.0410403	0.502474	0.468722	0.631561	-0.00680935	0.0497609	0.108897
	CSE3	0.467153	0.438352	0.396893	0.395632	0.65655	1	0.343581	0.345541	0.233149	0.153253	0.15541	0.61075	0.531499	0.613064	0.412948	-0.00518438	-0.0407909	-0.00359771	0.493903	0.417256	0.494637	0.0751004	0.0920796	0.172593
	ES1	0.414384	0.505962	0.63691	0.36418	0.246822	0.343581	1	0.606544	0.103274	0.0294765	0.169885	0.385136	0.356542	0.340624	0.369656	0.0598409	-0.0213825	-0.0157016	0.328851	0.331869	0.3526	0.123135	0.0538112	0.160409
	ES2	0.502271	0.619159	0.658289	0.37872	0.347925	0.345541	0.606544	1	0.200392	0.191987	0.198345	0.293334	0.364909	0.357633	0.372307	-0.0476792	-0.0383163	-0.18402	0.381982	0.407276	0.346826	0.0789801	0.0833979	-0.0208474
	PEOU1	0.231761	0.239413	0.309327	-0.0612779	0.0573189	0.233149	0.103274	0.200392	1	0.601435	0.365918	0.156624	0.236995	0.158895	0.311594	0.0670418	-0.0760123	-0.0883241	0.032793	-0.0792966	0.0443905	0.336037	0.234204	0.394474
	PEOU2	0.222765	0.15714	0.148468	-0.101221	0.00266412	0.153253	0.0294765	0.191987	0.601435	1	0.344573	0.0963675	0.177763	0.144969	0.296285	0.0168951	-0.0226857	-0.0460789	-0.0177476	0.0549144	0.015234	0.191248	0.24799	0.109242
	PEOU3	0.2335	0.111904	0.112552	-0.0157896	0.0137444	0.15541	0.169885	0.198345	0.365918	0.344573	1	0.0955935	0.198378	0.125296	0.152011	0.14031	-0.0404185	-0.182943	0.0518445	0.0509928	0.0413073	0.507358	0.157197	0.17552
	PN1	0.363142	0.428268	0.436442	0.338741	0.481183	0.61075	0.385136	0.293334	0.156624	0.0963675	0.0955935	1	0.585007	0.583999	0.428669	-0.0429521	-0.06001	0.00794047	0.47182	0.429337	0.279686	0.223401	-0.0265151	0.0511426
	PN2	0.392044	0.367755	0.482552	0.397911	0.504729	0.531499	0.356542	0.364909	0.236995	0.177763	0.198378	0.585007	1	0.607105	0.22012	0.150974	-0.00323376	0.00832903	0.415494	0.351559	0.369726	0.148247	0.127609	0.122376
	PN3	0.371479	0.413387	0.363233	0.434656	0.649897	0.613064	0.340624	0.357633	0.158895	0.144969	0.125296	0.583999	0.607105	1	0.43381	0.109017	-0.0280145	-0.00180659	0.494417	0.285587	0.417556	0.0789674	0.0711989	0.136253
	PN4	0.466625	0.438494	0.400574	0.342218	0.377405	0.412948	0.369656	0.372307	0.311594	0.296285	0.152011	0.428669	0.22012	0.43381	1	0.0714148	0.0495271	0.178395	0.314146	0.303231	0.294464	0.0959116	0.129068	0.216216
	PU1	-0.0285977	-0.0777421	-0.0782895	-0.052666	0.0648962	-0.00518438	0.0598409	-0.0476792	0.0670418	0.0168951	0.14031	-0.0429521	0.150974	0.109017	0.0714148	1	-0.0281884	0.133372	0.0320094	-0.0422614	0.103329	-0.0255227	-0.123986	0.0951632
	PU2	-0.135233	-0.0872707	-0.115423	-0.0687108	-0.134859	-0.0407909	-0.0213825	-0.0383163	-0.0760123	-0.0226857	-0.0404185	-0.06001	-0.00323376	-0.0280145	0.0495271	-0.0281884	1	0.451268	0.0224705	-0.0495857	-0.138832	-0.106199	0.00255776	-0.241039
	PU3	-0.0238577	-0.113273	-0.131435	0.0478819	0.0410403	-0.00359771	-0.0157016	-0.18402	-0.0883241	-0.0460789	-0.182943	0.00794047	0.00832903	-0.00180659	0.178395	0.133372	0.451268	1	0.0029375	0.0806586	0.0480941	-0.163381	-0.00769093	0.0556389
	SN1	0.339887	0.528906	0.450345	0.398229	0.502474	0.493903	0.328851	0.381982	0.032793	-0.0177476	0.0518445	0.47182	0.415494	0.494417	0.314146	0.0320094	0.0224705	0.0029375	1	0.668138	0.550283	-0.0675497	-0.0704374	-0.0685712
	SN2	0.383921	0.450367	0.357125	0.456362	0.468722	0.417256	0.331869	0.407276	-0.0792966	0.0549144	0.0509928	0.429337	0.351559	0.285587	0.303231	-0.0422614	-0.0495857	0.0806586	0.668138	1	0.637835	-0.0655742	-0.0156369	-0.0604863
	SN3	0.418649	0.386354	0.365994	0.545511	0.631561	0.494637	0.3526	0.346826	0.0443905	0.015234	0.0413073	0.279686	0.369726	0.417556	0.294464	0.103329	-0.138832	0.0480941	0.550283	0.637835	1	0.0484987	0.139935	0.141863
	SS1	0.174304	0.0584998	0.111004	-0.0259498	-0.00680935	0.0751004	0.123135	0.0789801	0.336037	0.191248	0.507358	0.223401	0.148247	0.0789674	0.0959116	-0.0255227	-0.106199	-0.163381	-0.0675497	-0.0655742	0.0484987	1	0.385033	0.224509
	SS2	0.177019	0.0435707	0.209921	0.134878	0.0497609	0.0920796	0.0538112	0.0833979	0.234204	0.24799	0.157197	-0.0265151	0.127609	0.0711989	0.129068	-0.123986	0.00255776	-0.00769093	-0.0704374	-0.0156369	0.139935	0.385033	1	0.40247
	SS3	0.185768	-0.00232293	0.10961	0.0235431	0.108897	0.172593	0.160409	-0.0208474	0.394474	0.109242	0.17552	0.0511426	0.122376	0.136253	0.216216	0.0951632	-0.241039	0.0556389	-0.0685712	-0.0604863	0.141863	0.224509	0.40247	1
